# Supplementary material for: Comparison of doublet and triplet therapies for metastatic hormone-sensitive prostate cancer: A systematic review and network meta-analysis
Source: PubMed Central journal article supplement (PMC10028133; doi:10.3389/fonc.2023.1104242), 2023-03-07
Supplement: DataSheet_1.pdf [file DataSheet_1.pdf]

Supplementary appendix for

**Comparison of Doublet and Triplet Therapies for Metastatic Hormone-Sensitive Prostate Cancer: A Systematic Review and Network Meta-analysis**

Pages 1-4: Search strategy

Pages 5-6: Risk of study bias

Pages 7-8: Patients' supplementary information of included trials

Page 9-10: Hazard Ratio for OS and PFS in included trials or subgroups

Page 11: Consistency test of closed-loop studies

Pages 12-18: Heterogeneity test

Pages 19-20: Supplementary forest plots

Pages 21-24: Relative effect estimates for all possible treatment comparisons

Pages 25-32: OS/PFS ranking and ranking probability of competing interventions based on overall population

Pages 33-44: Trace and density plots

Page 45: Summary of grade 3-5 adverse events in reported trials

Pages 46-64: Assessment of the certainty of evidence using the confidence in network meta-analysis (CINeMA)

## Supplementary Material 1: Search strategy

### MEDLINE (PubMed interface)

#### Related to mHSPC

- #1 Prostatic Neoplasms[Mesh] OR (prostat\*[tw] AND cancer[tw])
- #2 prostat\*[tiab] AND (canc\*[tiab] OR tumor[tiab] OR carcinom\*[tiab] OR adeno\*[tiab] OR malignan\*[tiab] OR tumour\*[tiab] OR neoplas\*[tiab] )
- #3 #1 OR #2
- #4 metastasis[Mesh] OR metasta\*[tw] OR advanced[tw]
- #5 Hormones[Mesh] OR hormon\*[tw] OR castrat\*[tw] OR androgen\*[tw] OR testosterone[tw]
- #6 sensitive[tw] OR naive[tw] OR primary[tw] OR de novo[tw] OR newly diagnosed[tw]
- #7 #3 AND #4 AND #5 AND #6

#### Related to intervention

- #8 Docetaxel[tw] OR Docetaxol[tw] OR RP 56976[tw] OR RP56976[tw] OR Taxotere[tw] OR NSC 628503[tw] OR Daxotel[tw]
- #9 abiraterone[tw] OR CB-7598[tw] OR CB7598[tw]
- #10 MDV3100[tw] OR Enzalutamide[tw] OR MDV-3100[tw] OR x tandi[tw]
- #11 apalutamide[tw] OR ARN-509[tw] OR arn509[tw] OR erleada[tw]
- #12 darolutamide[tw] OR odm201[tw] OR ODM-201[tw]
- #13 Radiotherapy[Mesh] OR radiotherap\*[tw] OR radiation [tw] OR irradiation [tw]
- #14: #8 OR #9 OR #10 OR #11 OR #12 OR #13

#### Related to RCT

- #15 randomized controlled trial [pt]
- #16 controlled clinical trial [pt]
- #17 randomized [tiab]
- #18 placebo [tiab]
- #19 Drug therapy [sh]
- #20 Randomly [tiab]
- #21 Trial [tiab]
- #22 Groups [tiab]
- #23: #15 OR #16 OR #17 OR #18 OR #19 OR #20 OR #21 OR #22
- #24 Animals [mh] NOT humans [mh]
- #25: #23 NOT #24

#### Combined items

- #26: #7 AND #14 AND #25

### EMBASE

#### Related to prostate cancer

1. 'prostate carcinoma'/exp
2. 'prostate cancer'/exp

3. 'prostate tumor'/exp
4. (prostat\* NEAR/3 adeno\*):ti,ab,kw
5. (prostat\* NEAR/3 malignan\*):ti,ab,kw
6. (prostat\* NEAR/3 canc\*):ti,ab,kw
7. (prostat\* NEAR/3 carcinoma\*):ti,ab,kw
8. (prostat\* NEAR/3 tumo?r\*):ti,ab,kw
9. (prostat\* NEAR/3 neoplas\*):ti,ab,kw
10. 1 OR 2 OR 3 OR 4 OR 5 OR 6 OR 7 OR 8 OR 9

Related to metastasis

11. metasta\*/exp 1035036
12. (metast\* NEAR/3 prostat\*):ti,ab,kw
13. (advanc\* NEAR/3 prostat\*):ti,ab,kw
14. 11 OR 12 OR 13

Related to hormone-sensitive

15. (hormon\* NEAR/3 prostat\*):ti,ab,kw
16. (castrat\* NEAR/3 prostat\*):ti,ab,kw
17. (androgen NEAR/3 prostat\*):ti,ab,kw
18. 15 OR 16 OR 17
19. sensitive/exp
20. naive/exp
21. 19 OR 20
22. 18 AND 21
23. (primary NEAR/6 prostat\*):ti,ab,kw
24. ('de novo\*' NEAR/6 prostat\*):ti,ab,kw
25. (new\* diagnos\*):ti,ab,kw
26. 22 OR 23 OR 24 OR 25

Related to intervention

27. 'docetaxel'/exp OR (Docetaxel OR Docetaxol OR "RP 56976" OR RP56976 OR Taxotere OR "NSC 628503" OR nsc628503 OR Daxotel OR dexotel):ti,ab,kw
28. 'abiraterone'/exp OR (abiraterone OR 'CB-7598' OR CB7598):ti,ab,kw
29. 'enzalutamide'/exp OR (Enzalutamide OR 'MDV-3100' OR MDV3100 OR xtandi):ti,ab,kw
30. 'apalutamide'/exp OR (apalutamide OR 'ARN-509' OR arn509 OR erleada):ti,ab,kw
31. 'darolutamide'/exp OR (darolutamide OR 'ORM-16497' OR 'ORM-16555' OR 'ODM-201' OR odm201):ti,ab,kw
32. 'radiotherapy'/exp OR (radiotherapy OR 'radiotherap\*' OR 'radiation' OR 'irradiation'):ti,ab,kw
33. 27 OR 28 OR 29 OR 30 OR 31 OR 32

Related to randomised controlled trials

34. 'randomi\*ed controlled trial'/exp
35. 'controlled clinical trial'/exp
36. randomi\*ed:ti,ab,kw

37. placebo:ti,ab,kw
38. 'clinical trial':ti,ab,kw
39. randomly:ti,ab,kw
40. 'double blind':ti,ab,kw
41. trial:ti,ab
42. groups:ti,ab
43. 34 OR 35 OR 36 OR 37 OR 38 OR 39 OR 40 OR 41 OR 42
44. ('animal'/exp OR 'animal experiment'/exp) NOT 'human'/exp
45. 43 NOT 44

Combining all terms

46. 10 AND 14 AND 26 AND 33 AND 45

#### Cochrane CENTRAL

Terms specific to prostate cancer:

1. MeSH descriptor: [Prostatic Neoplasms] explode all trees
2. (prostat\* near/3 malignan\*):ti,ab,kw
3. (prostat\* near/3 canc\*):ti,ab,kw
4. (prostat\* near/3 carcinoma\*):ti,ab,kw
5. (prostat\* near/3 tumor\*):ti,ab,kw
6. (prostat\* near/3 neoplas\*):ti,ab,kw
7. #1 or #2 or #3 or #4 or #5 or #6

Terms specific to metastatic disease:

8. MeSH descriptor: [Neoplasm Metastasis] explode all trees
9. (metast\* near/3 prostat\*):ti,ab,kw
10. (advanced\* near/3 prostat\*):ti,ab,kw
11. #8 or #9 or #10

Terms specific to hormonal sensitive:

12. hormon\*:ti,ab,kw
13. castra\*:ti,ab,kw
14. #12 OR #13
15. sensitive:ti,ab,kw
16. naive:ti,ab,kw
17. #15 OR #16
18. #14 AND #17
19. de-novo:ti,ab,kw
20. (new\* near/3 diagnos\*):ti,ab,kw
21. #19 OR #20
22. #18 OR #21

COMBINED



23. #7 and #11 and #22

ClinicalTrials.gov

Condition or disease: Prostate Cancer Metastatic

Study Type: Interventional Studies (Clinical Trials)

Study Results: Studies With Results

Last update posted: from 01/06/2017 to 01/06/2022

**Supplementary Material 2: Risk of study bias for OS (A) or PFS (B).**

|                                                           | TITAN | STAMPEDE armH | STAMPEDE armG | STAMPEDE armC | PEACE-1 | LATTITUDE | HORRAD | GETUG-AFU15 | ENZAMET | CHAARTED | ARCHES | ARASENS |
|-----------------------------------------------------------|-------|---------------|---------------|---------------|---------|-----------|--------|-------------|---------|----------|--------|---------|
| Random sequence generation (selection bias)               | +     | +             | +             | +             | +       | +         | +      | +           | +       | +        | +      | +       |
| Allocation concealment (selection bias)                   | +     | ?             | +             | +             | +       | +         | +      | +           | +       | +        | +      | +       |
| Blinding of participants and personnel (performance bias) | +     | +             | +             | +             | +       | +         | +      | +           | +       | +        | +      | +       |
| Blinding of outcome assessment (detection bias)           | +     | +             | +             | +             | +       | +         | +      | +           | +       | +        | +      | +       |
| Incomplete outcome data (attrition bias)                  | +     | +             | ?             | +             | +       | ?         | +      | ?           | +       | +        | ?      | +       |
| Selective reporting (reporting bias)                      | +     | +             | +             | +             | +       | +         | +      | ?           | +       | +        | +      | +       |
| Other bias                                                | +     | +             | +             | +             | ?       | +         | +      | ?           | +       | +        | +      | +       |

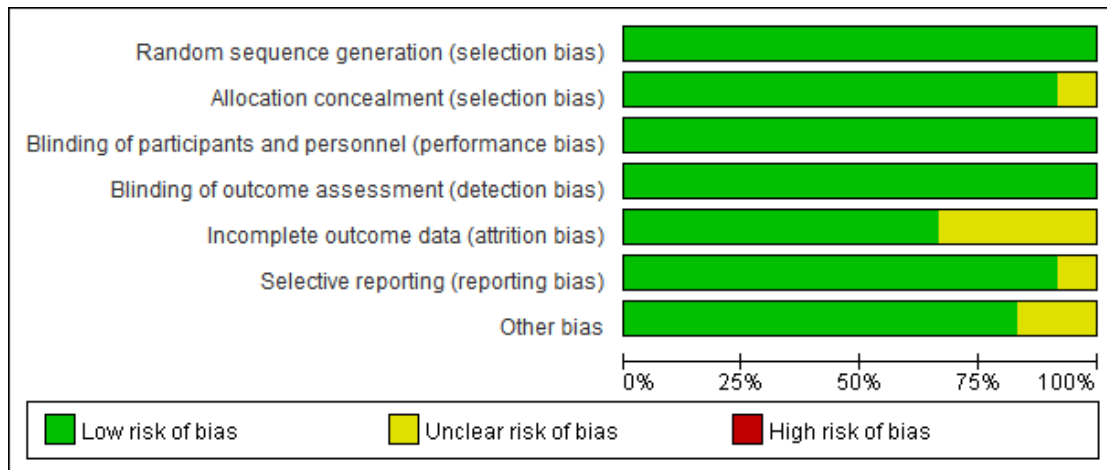

A



**Supplementary Material 3: Patients' supplementary information of included trials.**

| Trial                              | Performance status (ECOG/WHO grade, %) | Age (Exp. vs. Ctrl, yrs)                                | PSA (Exp. vs. Ctrl, ng/ml)                                    | Gleason score (Exp. vs. Ctrl, no. %)                                        | Visceral metastases (Exp. vs. Ctrl, no. %).                              | Metastatic burden (CHAARTED definition, Exp. vs. Ctrl, no. %)                                           | Metastases at initial diagnosis (Exp. vs. Ctrl, no. %) | Patients with planned/previous docetaxel use (Exp. vs. Ctrl, no. %) |
|------------------------------------|----------------------------------------|---------------------------------------------------------|---------------------------------------------------------------|-----------------------------------------------------------------------------|--------------------------------------------------------------------------|---------------------------------------------------------------------------------------------------------|--------------------------------------------------------|---------------------------------------------------------------------|
| GETUG -AFU15 <sup>[9, 35]</sup>    | Grade 0, 97.5%<br>Grade 1-2, 2.5%      | Median(IQR): 63 (57-68)<br>vs. 64 (58-70)<br>Range: NR  | Median(IQR): 26.7 (5-106)<br>vs. 25.8 (5-126)<br>Range: NR    | ≤7: 84(45) vs. 78(41)<br>8-10: 103(55) vs. 113(59)<br>Unknown: 2 vs. 5      | 28 (15)<br>vs. 23 (12)                                                   | LVD: 100(52) vs. 102(53)<br>HVD:92(48) vs. 91(47)<br>Unknown: 0                                         | 128(67)<br>vs. 144(76)                                 | none                                                                |
| CHAARTED <sup>[10, 36]</sup>       | Grade 0, 69.5%<br>Grade 1-2, 30.5%     | Median(IQR): 64(NR) vs.<br>63(NR)<br>Range: 36-91       | Median(IQR): 50.9(NR) vs.<br>52.1(NR)<br>Range: 0.1-8540      | ≤7: 117(33) vs.104(30)<br>8-10: 241(67)<br>vs.243(70)<br>Unknown: 46 vs. 39 | 57 (14)<br>vs. 66 (17)                                                   | LVD:134(34)<br>vs. 143(36)<br>HVD:263(66)<br>vs. 250(64)<br>Unknown: 0                                  | 289(73)<br>vs. 286(73)                                 | none                                                                |
| STAMPEDE-arm C <sup>[11][29]</sup> | Grade 0, 72.8%<br>Grade 1-2, 27.2%     | Median(IQR): 65(60-70)<br>vs. 65(60-71)<br>Range: NR    | Median(IQR): 97(40.5-340) vs.<br>102.5(32.8-354)<br>Range: NR | ≤7: 65(20) vs.158(25)<br>8-10: 253(80)<br>vs. 480(75)<br>Unknown: 44 vs. 86 | Lung:13(4) vs.33(5)<br>Liver: 6(2) vs. 15(2)<br>Other: 25(7) vs. 46(6)   | LVD:124(46) vs. 238(43)<br>HVD:148(54)<br>vs. 320(57)<br>Unknown: 90 vs. 166                            | Total: 1037(95)                                        | none                                                                |
| STAMPEDE-arm G <sup>[12, 28]</sup> | Grade 0, 74.6%<br>Grade 1-2, 25.4%     | Median(IQR): 67(NR) vs.<br>67(NR)<br>Range: NR          | Median(IQR): 51(19-158)vs.<br>56(19-165)<br>Range: NR         | ≤7: 104(23) vs.110(24)<br>8-10: 345(77)<br>vs.342(76)<br>Unknown: 101       | 22 (5)<br>vs. 19 (4)                                                     | LVD:206(46) vs. 196(43)<br>HVD:243(54)<br>vs. 256(57)<br>Unknown: 101                                   | Total: 859(95)                                         | none                                                                |
| STAMPEDE-arm H <sup>[17]</sup>     | Grade 0, 71.1%<br>Grade 1-2, 28.9%     | Median(IQR): 68(63-73) vs.<br>68(63-73)<br>Range: 37-87 | Median(IQR): 97(30-313)<br>vs. 98(30-316)<br>Range: 1-20590   | ≤7: 172(18) vs.173(17)<br>8-10: 810(82)<br>vs.820(83)<br>Unknown: 36 vs. 50 | Lung:48(5) vs. 42(4)<br>Liver: 19(2) vs. 23(2)<br>Other: 33(3) vs. 35(3) | LVD:410(43) vs.409(42)<br>HVD:553(57)vs. 567(58)<br>Unknown: 69 vs. 53<br>52% high in HORRAD definition | Total: 2061(100)                                       | 183(18)<br>vs. 184(18)                                              |
| LATITUDE <sup>[13, 34]</sup>       | Grade 0-1, 96.7%<br>Grade 2, 3.3%      | Median(IQR): 68(NR)<br>vs. 67(NR)<br>Range: 33-92       | Median(IQR): NR(NR) vs.<br>NR(NR)<br>Range: NR                | ≤7: 13(2) vs.16(3)<br>8-10: 584(98)<br>vs.586(97)<br>Unknown: 0             | 114 (19)<br>vs. 114 (19)                                                 | LVD:110(18) vs. 133(22)<br>HVD:487(82)<br>vs. 468(78)<br>Unknown: 0 vs 1                                | Total: 1199(100)                                       | none                                                                |
| ENZAMET <sup>[14]</sup>            | Grade 0, 72.0%<br>Grade 1-2, 28.0%     | Median(IQR): 69(63-74)<br>vs. 69(64-74)<br>Range: NR    | Median(IQR): NR(NR) vs.<br>NR(NR)<br>Range: NR                | ≤7: 152(31) vs.163(34)<br>8-10: 335(69)<br>vs.321(66)<br>Unknown: 76 vs 78  | 62 (11)<br>vs. 67 (12)                                                   | LVD:272(48) vs. 265(47)<br>HVD:291(52)<br>vs. 297(53)<br>Unknown: 0                                     | 325(58)<br>vs. 327(58)                                 | 254(45)<br>vs. 249(44)                                              |

|                                                      |                                          |                                                            |                                                                  |                                                                             |                        |                                                                     |                                                  |                        |
|------------------------------------------------------|------------------------------------------|------------------------------------------------------------|------------------------------------------------------------------|-----------------------------------------------------------------------------|------------------------|---------------------------------------------------------------------|--------------------------------------------------|------------------------|
| ARCHES<br>[15, 31, 33]                               | Grade 0,<br>77.5%<br>Grade 1,<br>22.5%   | Median(IQR):<br>70(NR) vs.<br>70(NR)<br>Range: 42-92       | Median(IQR):<br>5.4(NR) vs.<br>5.1(NR)<br>Range: 0-19000         | ≤7: 171(31) vs.187(33)<br>8-10: 386(69)<br>vs.373(67)<br>Unknown: 16 vs. 17 | NR                     | LVD:220(38) vs. 203(35)<br>HVD:354(62)<br>vs. 373(65)<br>Unknown: 0 | 402(83)<br>vs. 365(81)<br>unknown: 89 vs.<br>125 | 103(18)<br>vs. 102(18) |
| TITAN <sup>[16, 32]</sup>                            | Grade 0,<br>64.3%<br>Grade 1,<br>35.7%   | Median(IQR):<br>69(NR) vs.<br>68(NR)<br>Range: 43-94       | Median(IQR):<br>5.97(NR)<br>vs. 4.02(NR)<br>Range: 0-2682        | ≤7: 174(33) vs.169(32)<br>8-10: 351(67)<br>vs.358(68)<br>Unknown: 0         | 56 (11)<br>vs. 72 (14) | LVD:200(38) vs. 192(36)<br>HVD:325(62)<br>vs. 335(64)<br>Unknown: 0 | 411(83)<br>vs. 441(88)<br>unknown: 29 vs.<br>27  | 58(11)<br>vs. 55(10)   |
| HORRAD <sup>[41]</sup>                               | Grade 0,<br>84.0%<br>Grade 1-3,<br>16.0% | Median(IQR):<br>67(61-71) vs.<br>67(61-71)<br>Range: 47-85 | Median(IQR):<br>125(48-433)<br>vs. 149(50-483)<br>Range: 4-14000 | ≤7: 73(34) vs.71(33)<br>8-10: 142(66)<br>vs.144(67)<br>Unknown: 1 vs 1      | NR                     | LVD: NR; HVD: NR<br>82% high in HORRAD<br>definition                | Total: 432(100)                                  | none                   |
| PEACE-1 <sup>[23]</sup><br>(Docetaxel<br>population) | Grade 0,<br>69.9%<br>Grade 1-2,<br>30.1% | Median(IQR):<br>66(60-70) vs.<br>66(59-70)                 | Median(IQR):<br>13.7 (2.4-58.9) vs.<br>12.0 (3.0-59.9)           | ≤7: 79(23) vs.71(20)<br>8-10:270(77)<br>vs.276(80)                          | 41(12) vs. 47(13)      | LVD:131(37) vs. 123(35)<br>HVD: 224(63) vs. 232(65)                 | Total: 710(100)                                  | none                   |
| ARASENS <sup>[24]</sup>                              | Grade 0,<br>71.1%<br>Grade 1,<br>28.9%   | Median(Range):<br>67(41-89) vs.<br>67(42-86)               | Median(Range):<br>30.3 (0-9219)<br>vs. 24.2 (0-11947)            | ≤7: 122(18.7) vs.118(18)<br>8-10: 505(77.6)<br>vs.516(78.9)                 | 111(17) vs. 118(18)    | NR                                                                  | 558(85.7)<br>vs. 566(86.5)<br>unknown: 6 vs 7    | none                   |

Ctrl: control group; ECOG: Eastern Cooperative Oncology Group; Exp.: experimental group; HVD: high volume disease; IQR: interquartile range; LVD: low volume disease; NR: not reported; PSA: prostatic specific antigen.

**Supplementary Material 4A: Hazard Ratio for OS and PFS in included trials or subgroups**

| STUDY No.[Ref.]            | Trial                         | Comparison               | Patients number   | HR (OS -total)  | HVD-pts number | HR (OS-HVD)      | LVD-pts number | HR (OS-LVD)      | Visceral meta-pts | HR (OS-visc.)   | PFS type     | HR(PFS -total)                     |
|----------------------------|-------------------------------|--------------------------|-------------------|-----------------|----------------|------------------|----------------|------------------|-------------------|-----------------|--------------|------------------------------------|
| 1 <sup>[10, 37]</sup>      | GETUG -AFU15                  | DOC+ADT vs ADT           | 385               | 0.88, 0.68-1.14 | 183            | 0.78, 0.56-1.09  | 202            | 1.02, 0.67-1.55  | NR                | NR              | rPFS<br>cPFS | 0.69, 0.55-0.87<br>0.75, 0.59-0.94 |
| 2 <sup>[11, 38]</sup>      | CHAARTED                      | DOC+ADT vs ADT           | 790               | 0.72, 0.59-0.89 | 513            | 0.63, 0.50-0.79  | 277            | 1.04, 0.70-1.55  | 123 (15.6%)       | 0.53, 0.30-0.92 | cPFS         | 0.62, 0.51-0.75                    |
| 3 <sup>[12] [31]</sup>     | STAMPEDE -arm C               | DOC+ADT vs ADT           | 1086a             | 0.81, 0.69-0.95 | 468            | 0.81, 0.64-1.02  | 362            | 0.76, 0.54-1.07  | NR                | NR              | PFS          | 0.69, 0.59-0.81                    |
| 4 <sup>[14, 36]</sup>      | LATITUDE                      | AAP+ADT vs ADT           | 1199              | 0.66, 0.56-0.78 | 955            | 0.62, 0.52-0.74  | 243            | 0.72, 0.47-1.10  | 228 (19.0%)       | 0.58, 0.41-0.83 | rPFS         | 0.47, 0.39-0.55                    |
| 5 <sup>[13, 30]</sup>      | STAMPEDE -arm G               | AAP+ADT vs ADT           | 1002 <sup>a</sup> | 0.61, 0.49-0.75 | 499            | 0.60, 0.46-0.78  | 402            | 0.64, 0.42-0.97  | NR                | NR              | PFS          | 0.45, 0.37-0.54                    |
| 6 <sup>[32]</sup>          | STAMPEDE, AAP vs. DOC         | AAP+ADT vs DOC+ADT       | 342 <sup>b</sup>  | 1.13, 0.77-1.66 | NR             | NR               | NR             | NR               | NR                | NR              | PFS          | 0.69, 0.50-0.95                    |
| 7 <sup>[15]</sup>          | ENZAMET <sup>c</sup>          | ENZA+ADT vs ADT          | 622               | 0.53, 0.37-0.75 | 232            | 0.65, 0.42-0.99  | 390            | 0.38, 0.21-0.69  | 129 (11.5%)       | 1.05, 0.54-2.02 | cPFS         | 0.34, 0.26-0.44                    |
| 8 <sup>[15]</sup>          | ENZAMET, DOC-sub              | ENZA+DOC+ADT vs DOC+ ADT | 503               | 0.90, 0.62-1.31 | 356            | 0.97, 0.64- 1.46 | 147            | 0.65, 0.25- 1.71 |                   |                 |              | 0.48, 0.37-0.62                    |
| 9 <sup>[16, 33, 35]</sup>  | ARCHES <sup>c</sup>           | ENZA+ADT vs ADT          | 945               | 0.64, 0.51-0.81 | 727            | 0.66, 0.52-0.83  | 423            | 0.66, 0.43-1.03  | 128 (11.13%)      | 1.16, 0.67-2.00 | rPFS         | 0.37, 0.28-0.49                    |
| 10 <sup>[16, 33, 35]</sup> | ARCHES, DOC-sub               | ENZA+DOC+ADT vs DOC+ ADT | 205               | 0.74, 0.46-1.20 |                |                  |                |                  |                   |                 |              | 0.52, 0.30-0.89                    |
| 11 <sup>[17, 34]</sup>     | TITAN <sup>c</sup>            | APA+ADT vs ADT           | 939               | 0.61, 0.50-0.76 | 660            | 0.70, 0.56-0.88  | 392            | 0.52, 0.35-0.79  | 128 (12.2%)       | 0.76, 0.47-1.23 | rPFS         | 0.48, 0.39-0.60                    |
|                            | TITAN, DOC-sub                |                          | 113               | 1.12 0.59-2.12  |                |                  |                |                  |                   |                 |              |                                    |
| 12 <sup>[18]</sup>         | STAMPEDE - arm H <sup>c</sup> | RT+ADT vs ADT            | 1691              | 0.93, 0.80-1.08 | 1120           | 1.07, 0.90-1.28  | 819            | 0.68, 0.52-0.90  | NR                | NR              | PFS          | 0.96, 0.85-1.08                    |
|                            | STAMPEDE-arm H, DOC-sub       |                          | 367               | 0.81 0.49-1.34  |                |                  |                |                  |                   |                 |              |                                    |
| 13 <sup>[43]</sup>         | HORRAD                        | RT+ADT vs ADT            | 432               | 0.90, 0.70-1.14 | NR             | NR               | NR             | NR               | NR                | NR              | NR           | NR                                 |
| 14 <sup>[25]</sup>         | PEACE-1, DOC-sub              | AAP+DOC+ADT vs DOC+ ADT  | 710               | 0.75, 0.59-0.95 | 456            | 0.72, 0.55-0.95  | 254            | 0.83, 0.50-1.38  | 88 (12.4%)        | NR              | rPFS         | 0.50, 0.40-0.62                    |
| 15 <sup>[26]</sup>         | ARASENS                       | DARO+DOC+ADT vs DOC+ ADT | 1305              | 0.68, 0.57-0.80 | NR             | NR               | NR             | NR               | 229 (17.5%)       | 0.79, 0.55-1.14 | NR           | NR                                 |

<sup>a</sup> only metastatic patients were included; <sup>b</sup> direct comparison of abiraterone versus docetaxel from the multi-arm, multi-stage STAMPEDE trial; <sup>c</sup> patients with prior or concomitant docetaxel chemotherapy were excluded. AAP: abiraterone and prednisone; cPFS: clinical progression free survival; DOC: docetaxel; DOC-sub: subgroup with docetaxel population and available for triplet therapy analyses; HR: hazard ratio; HVD: high volume disease; LVD: low volume disease; NO.: number; NR: not reported; OS: overall survival; PFS: progression free survival; Ref.: reference; rPFS: radiographic progression free survival; visc.: visceral metastasis.

**Supplementary Material 4B: Hazard Ratio for OS in de novo and previous local treatment subgroups**

| STUDY No.          | 1                                       | 2                | 3                  | 4               | 5                  | 6                       | 7                 | 9                 | 11               | 12              | 13              | 14                | 15                 |
|--------------------|-----------------------------------------|------------------|--------------------|-----------------|--------------------|-------------------------|-------------------|-------------------|------------------|-----------------|-----------------|-------------------|--------------------|
| Trial              | GETUG-AFU15                             | CHAARTED         | STAMPEDE-arm C     | LATITUDE        | STAMPEDE-arm G     | STAMPEDE, abir vs. doce | ENZAMET           | ARCHES            | TITAN            | STAMPED E-RT    | HORRAD          | PEACE-1, doce-sub | ARASENS            |
| Patients number    | 385                                     | 790              | 1776*              | 1199            | 1917*              | 342 <sup>§</sup>        | 1125              | 1150              | 1052             | 2061            | 432             | 710               | 1305               |
| HR (OS-total)      | 0.88, 0.68-1.14                         | 0.72, 0.59-0.89  | 0.78, 0.66-0.93    | 0.66, 0.56-0.78 | 0.63, 0.52-0.76    | 1.13, 0.77-1.66         | 0.67, 0.52-0.86   | 0.66, 0.53-0.81   | 0.65, 0.53-0.79  | 0.92, 0.80-1.06 | 0.90, 0.70-1.14 | 0.75, 0.59-0.95   | 0.68, 0.57-0.80    |
| De novo-pts number | 144/190(76%)<br>ADT:DOC<br>128/190(67%) | 575/789<br>(73%) | 1681/1776<br>(95%) | 100%            | 1819/1917<br>(95%) | NA                      | 652/1125<br>(58%) | 890/1136<br>(78%) | 852/996<br>(86%) | 100%            | 100%            | 100%              | 1124/1292<br>(87%) |
| HR (OS-de novo)    | 0.93, 0.69-1.25                         | 0.68, 0.54-0.85  | 0.78, 0.65-0.94    | 0.66, 0.56-0.78 | 0.61, 0.50-0.74    | NA                      | 0.65, 0.47-0.89   | 0.63, 0.50-0.79   | 0.68, 0.55-0.85  | 0.92, 0.80-1.06 | 0.90, 0.70-1.14 | 0.75, 0.59-0.95   | 0.71, 0.59-0.85    |
| PLT-pts number     | 46/190(24%)<br>ADT:DOC<br>62/190(33%)   | 214/789<br>(27%) | 95/1776<br>(5%)    | 0               | 98/1917<br>(5%)    | NA                      | 473/1125<br>(42%) | 246/1136<br>(22%) | 144/996<br>(14%) | NA              | NA              | NA                | 168/1292<br>(13%)  |
| HR (OS-PLT)        | 0.83, 0.47-1.47                         | 0.97, 0.58-1.62  | 0.80, 0.26-2.48    | NA              | 0.94, 0.35-2.52    | NA                      | 0.72, 0.47-1.09   | 0.71, 0.41-1.21   | 0.39, 0.22-0.69  | NA              | NA              | NA                | 0.61, 0.35-1.05    |

\*Metastatic and localized patients were all included; <sup>§</sup> Direct comparison of abiraterone versus docetaxel from the multi-arm, multi-stage STAMPEDE trial; doce-sub: subgroup with docetaxel population and available for triple treatment analysis. PLT: previous local treatment.

**Supplementary Material 5: Consistency test of closed-loop studies**

|    | comparison        | p.value  | CrI                   |
|----|-------------------|----------|-----------------------|
| 1  | d.ADT.DOC+ADT     | 0.162625 |                       |
| 2  | -> direct         |          | -0.23 (-0.38, -0.073) |
| 3  | -> indirect       |          | -0.57 (-1.0, -0.11)   |
| 4  | -> network        |          | -0.26 (-0.41, -0.12)  |
| 5  | d.ADT.AAP+ADT     | 0.173875 |                       |
| 6  | -> direct         |          | -0.45 (-0.63, -0.26)  |
| 7  | -> indirect       |          | -0.11 (-0.56, 0.34)   |
| 8  | -> network        |          | -0.41 (-0.57, -0.23)  |
| 9  | d.DOC+ADT.AAP+ADT | 0.156700 |                       |
| 10 | -> direct         |          | 0.13 (-0.30, 0.55)    |
| 11 | -> indirect       |          | -0.22 (-0.46, 0.020)  |
| 12 | -> network        |          | -0.15 (-0.34, 0.076)  |



## Supplementary Material 6: Heterogeneity test

Heterogeneity test for OS for all population

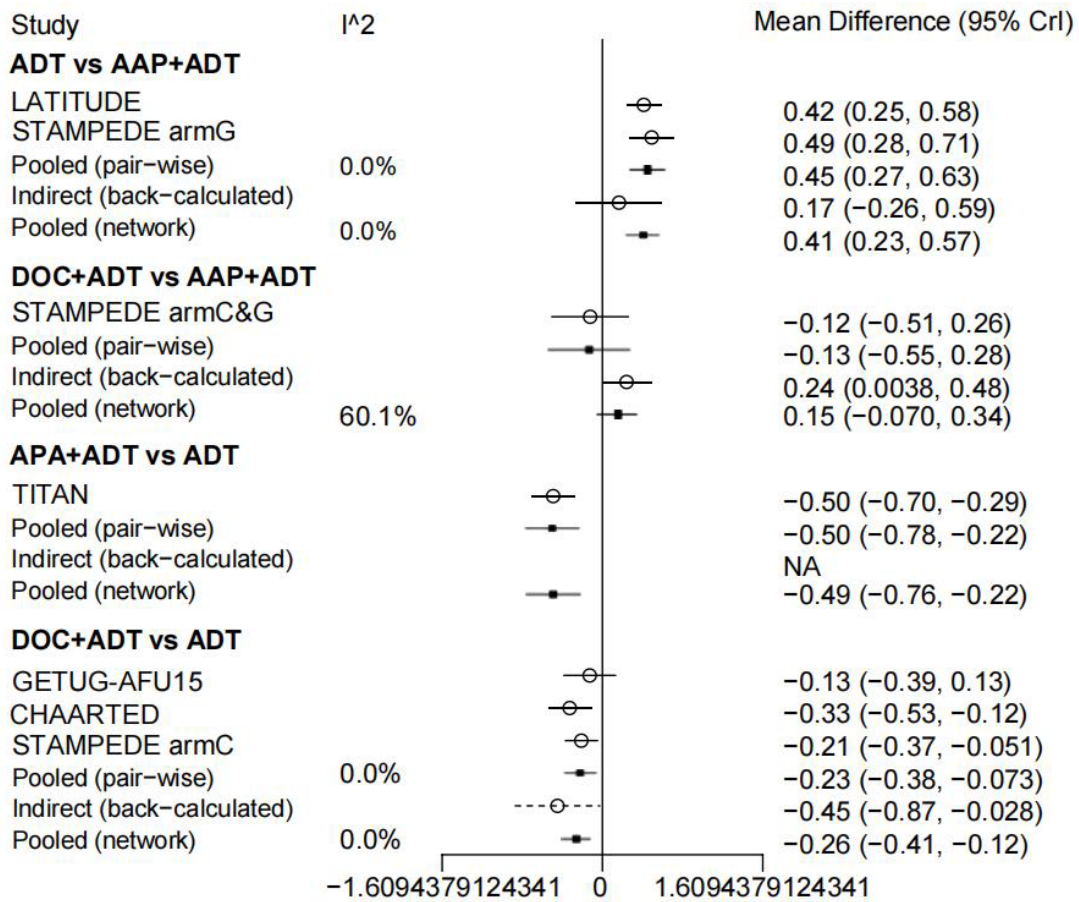

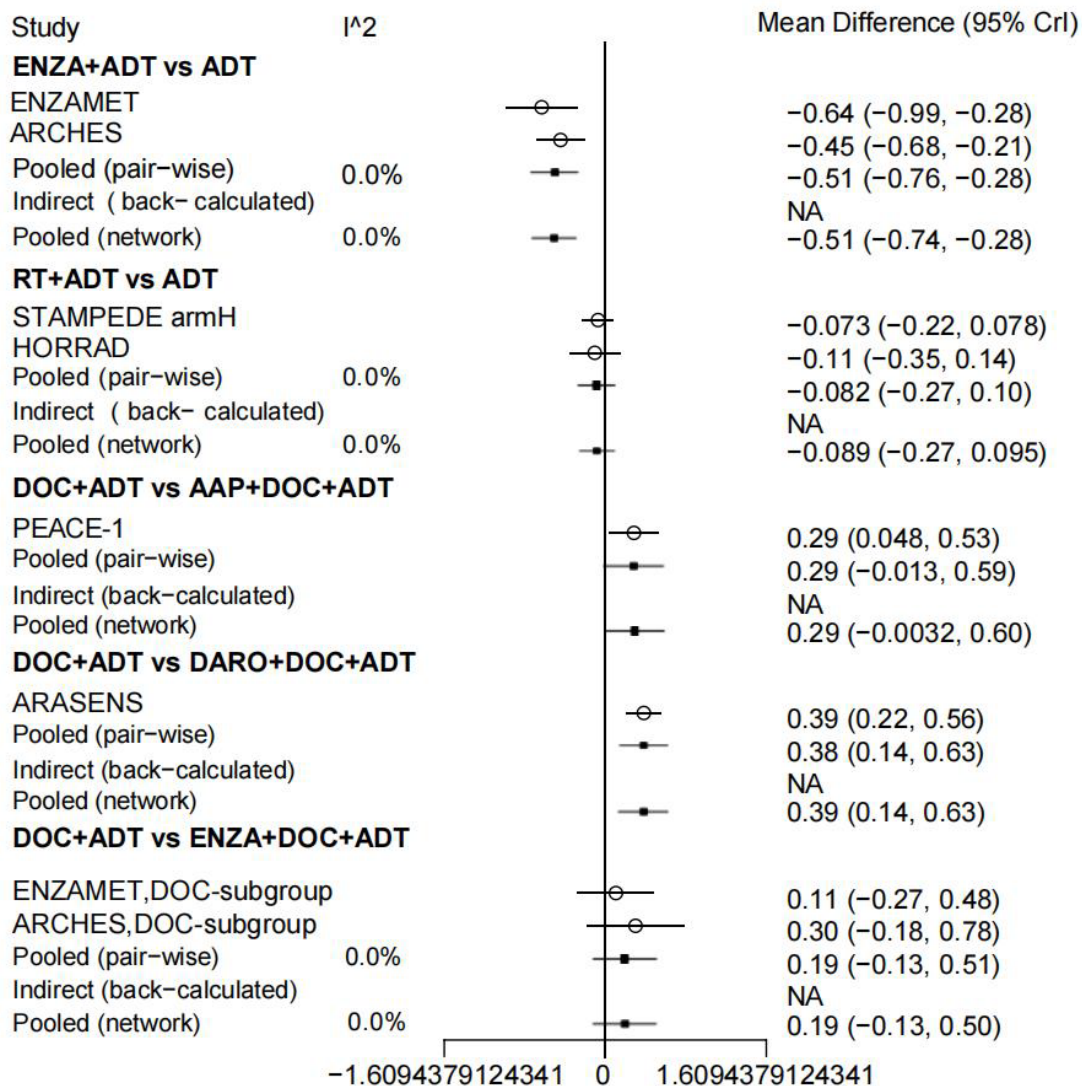

Heterogeneity test for PFS

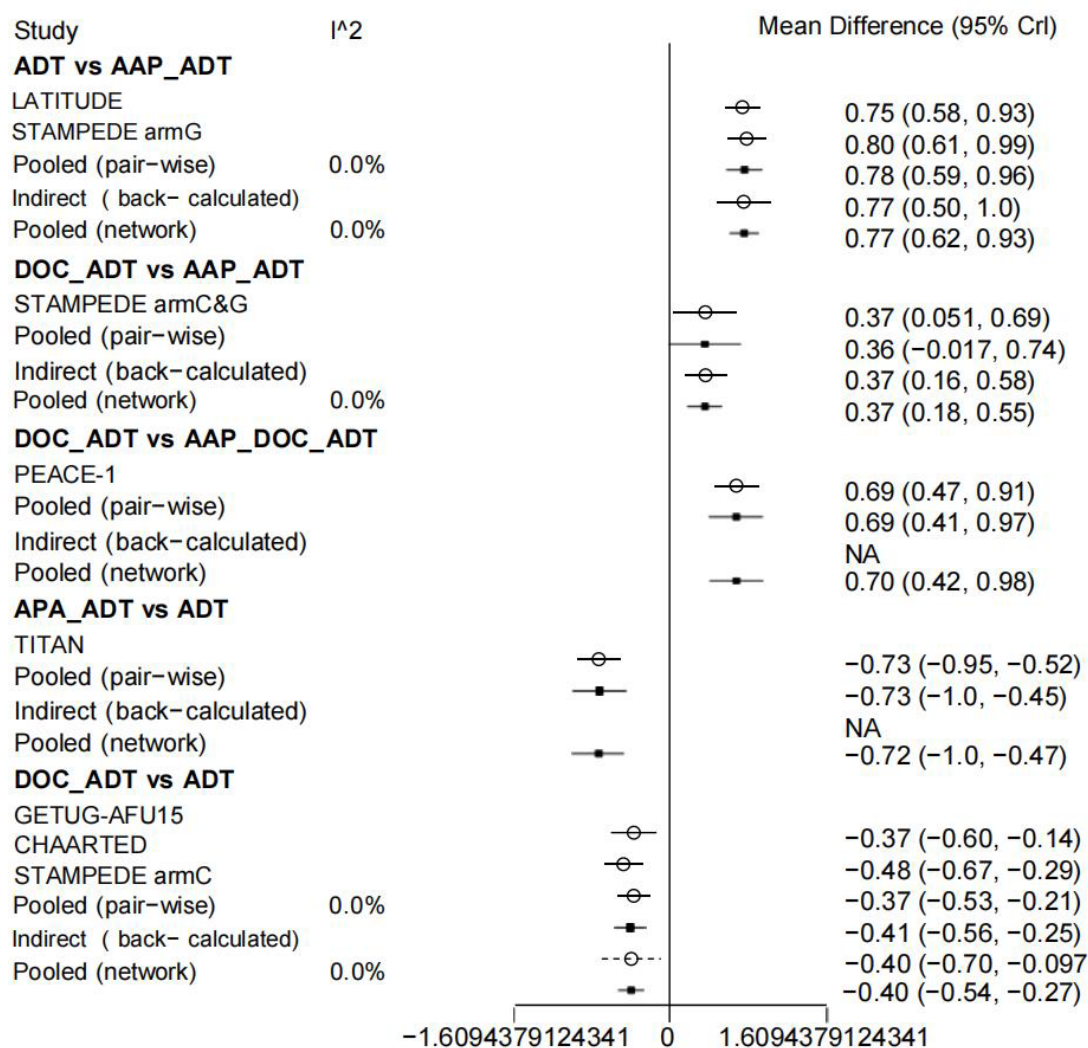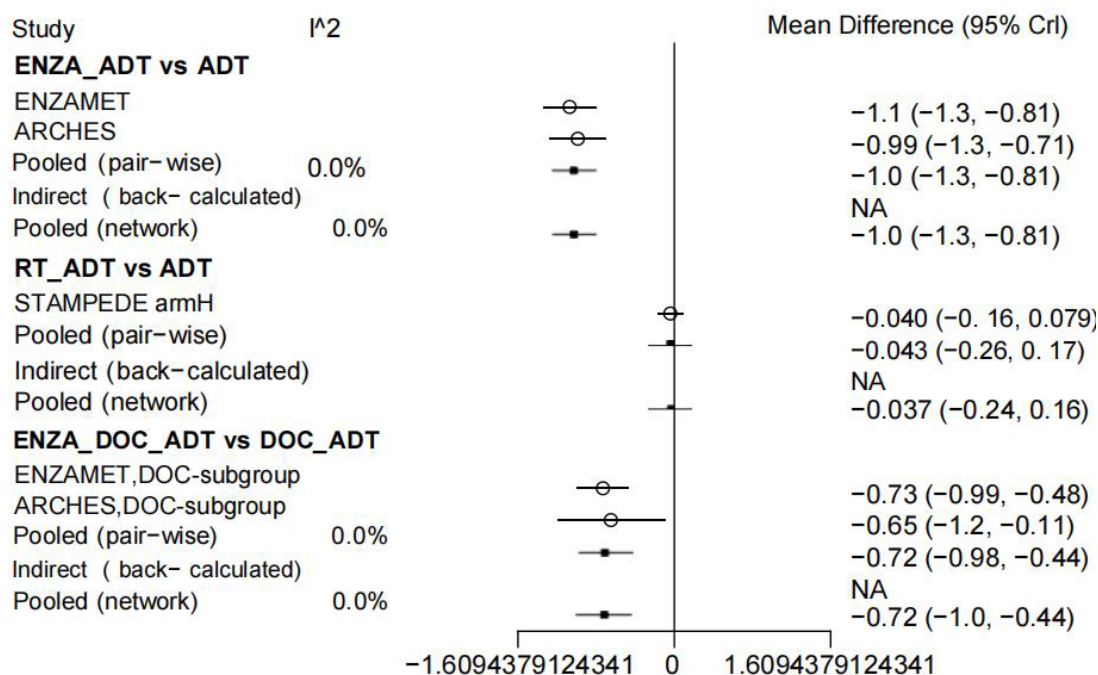

Heterogeneity test for OS-HVD

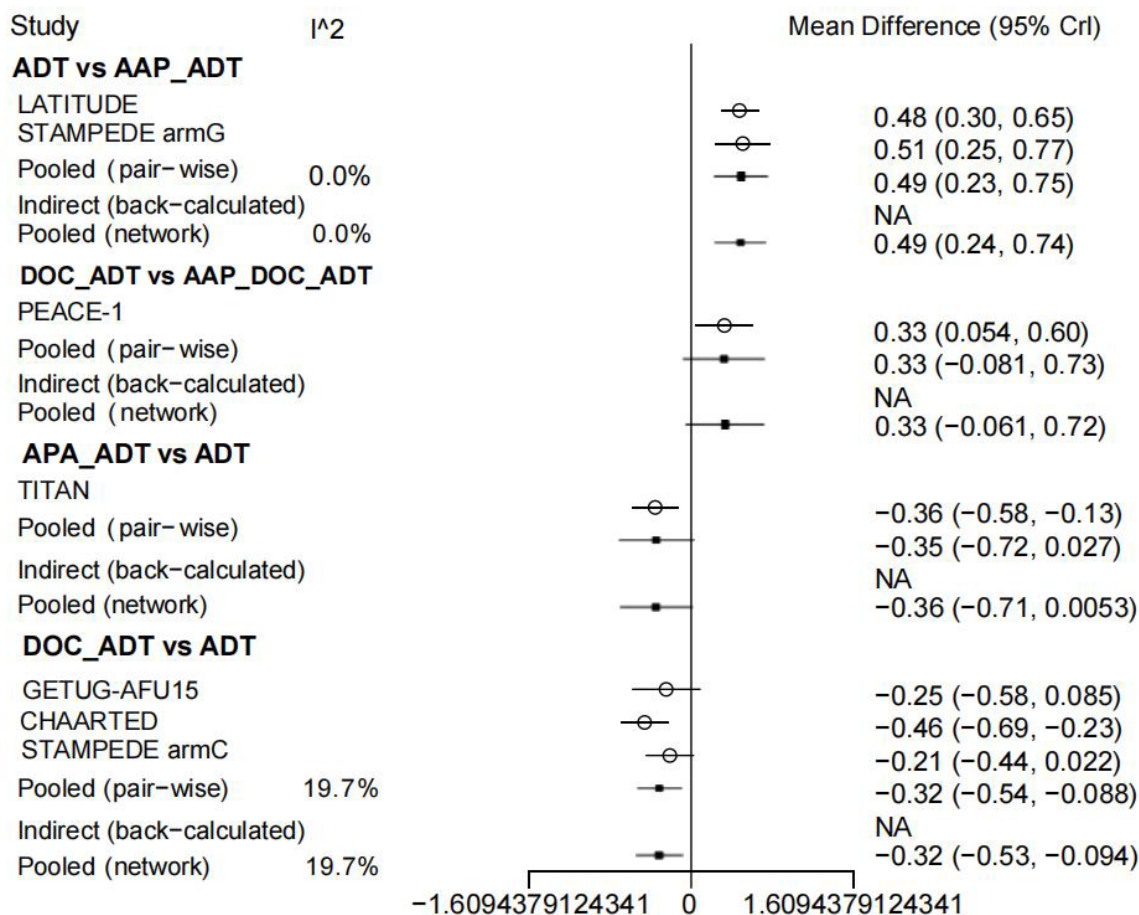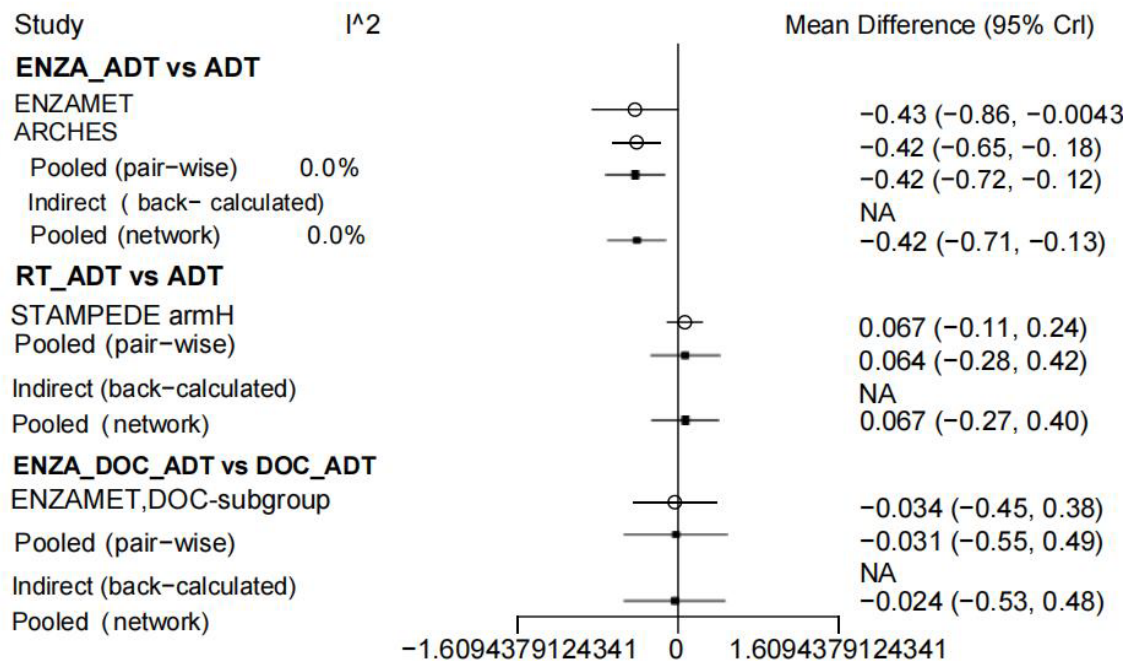



Heterogeneity test for OS-LVD

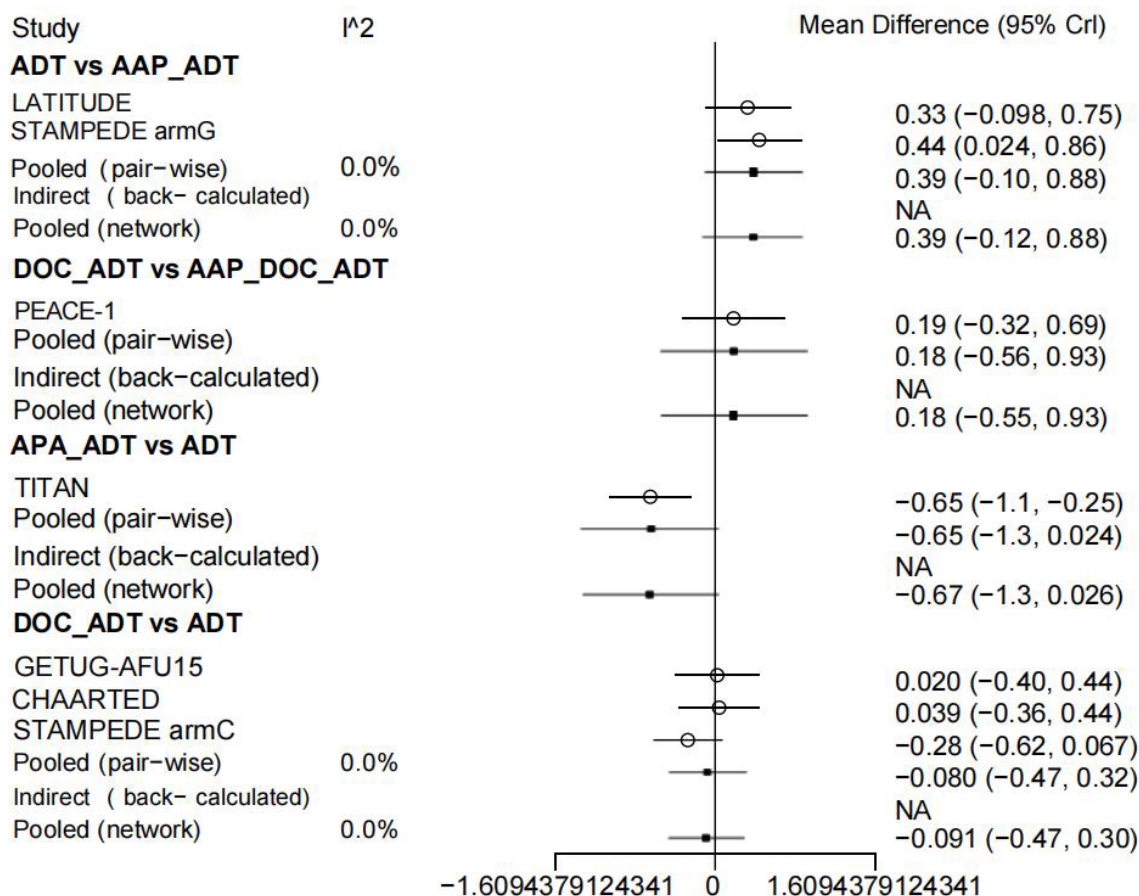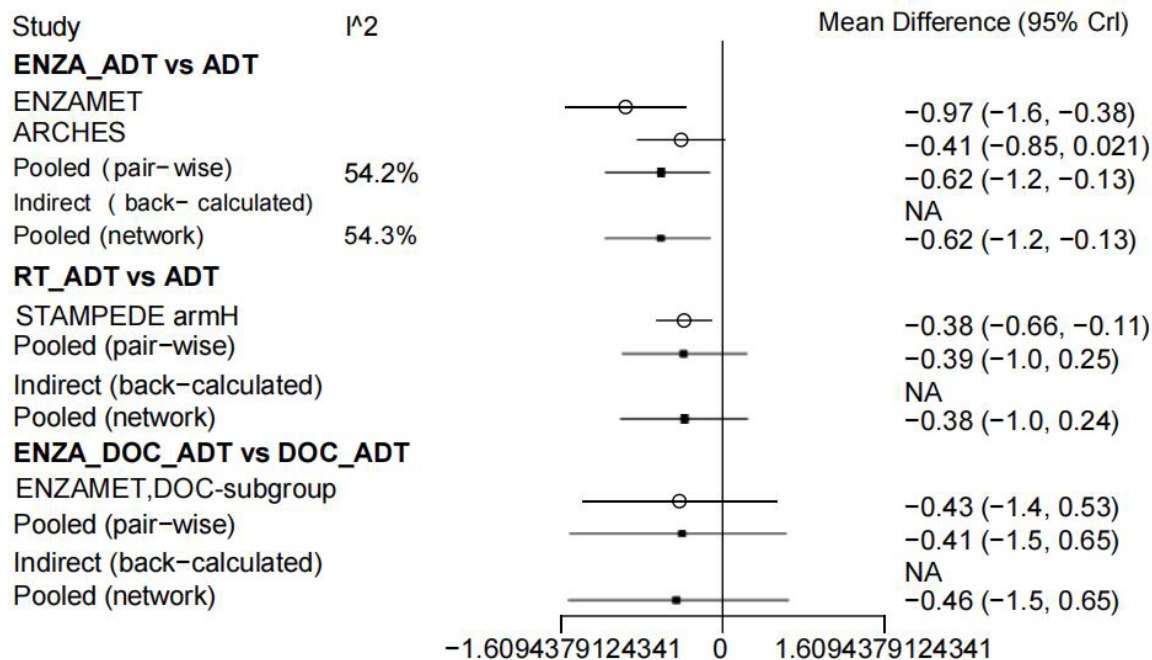

Heterogeneity test for OS-visceral metastasis

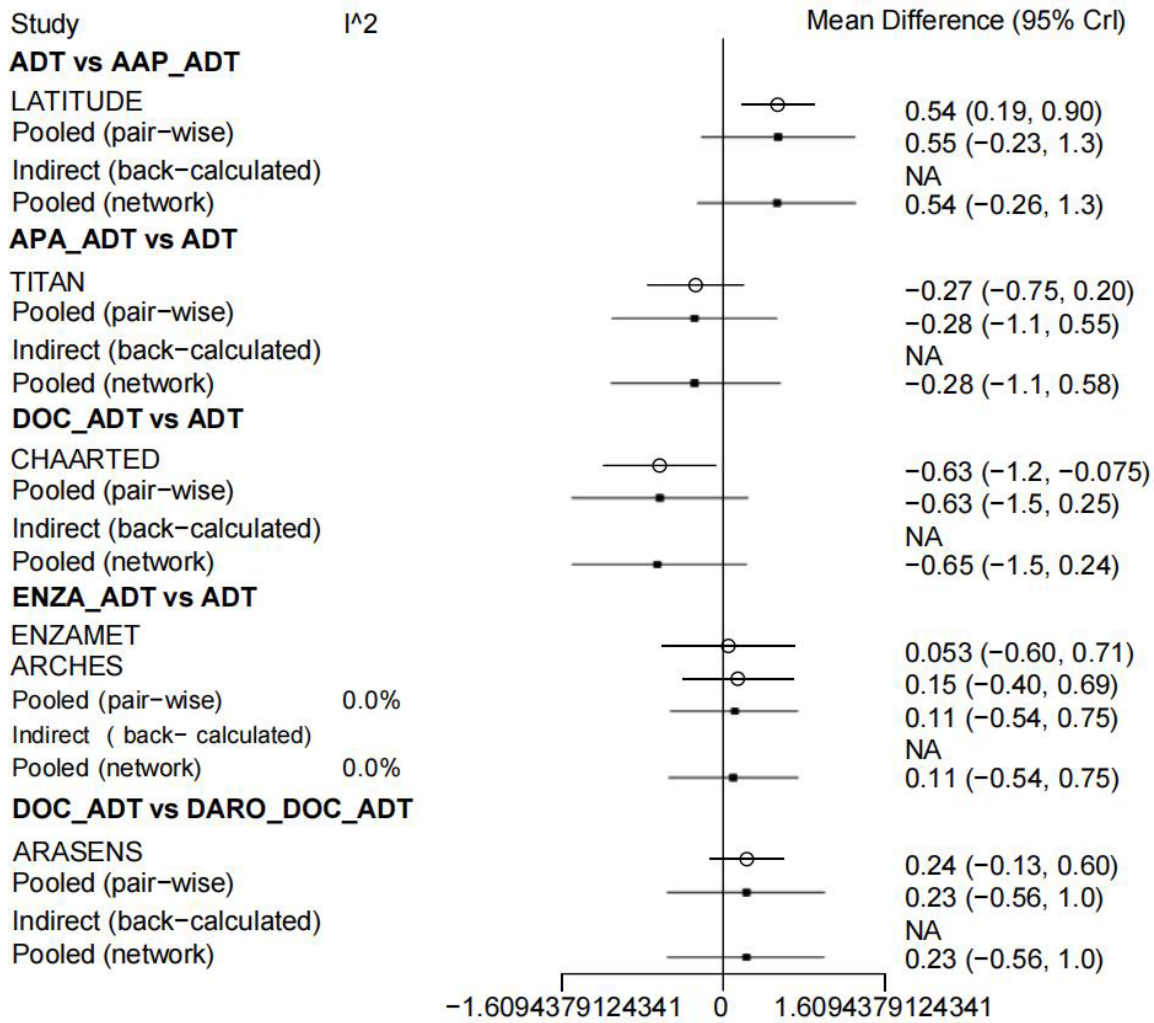

Heterogeneity test for high grade AE

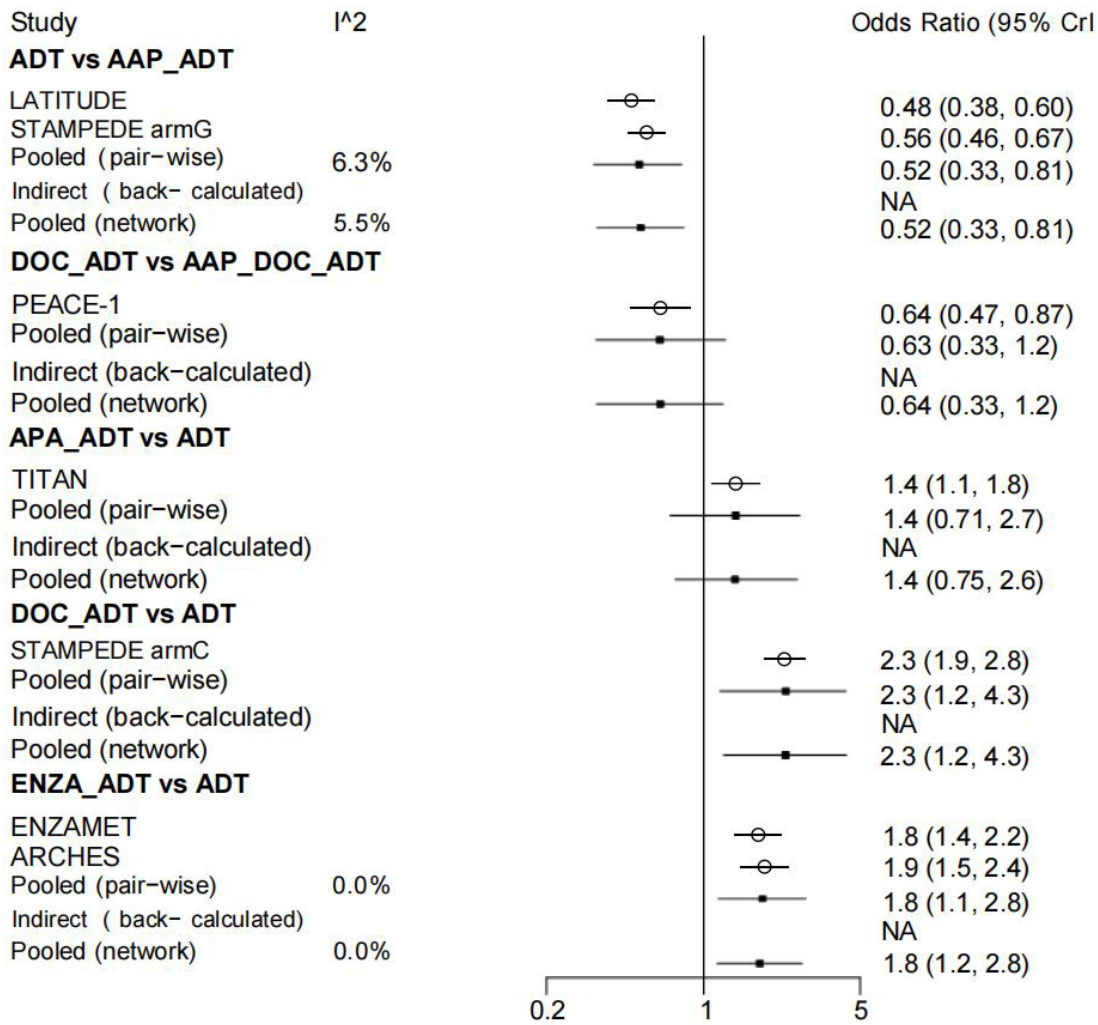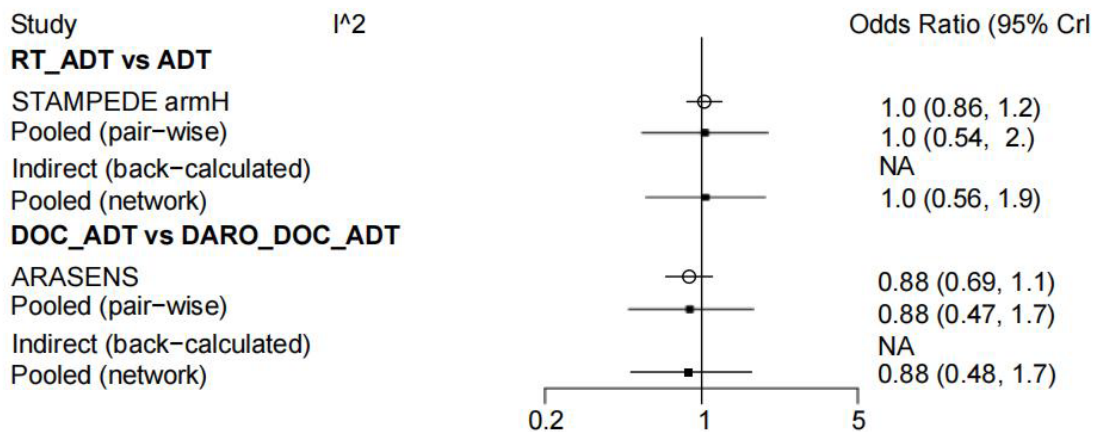

**Supplementary materials 7: Supplementary forest plots (for de novo and previous local treatment patients, as well as respective analyses for rPFS, PFS and cPFS)**

ADT: androgen deprivation treatment; DOC: docetaxel; AAP: abiraterone acetate and prednisone; ENZA: enzalutamide; APA: apalutamide; RT: radiotherapy; DARO: darolutamide. OS: overall survival; PFS: progression free survival; cPFS: clinical progression free survival; rPFS: radiographic progression free survival; The connector line “\_” represents combination of different treatment regimens.

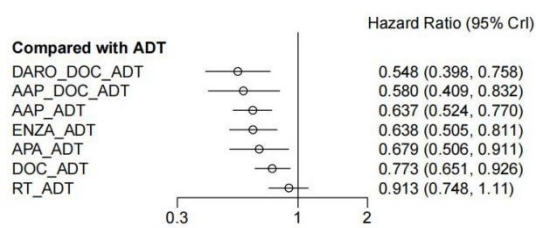

A: OS for de novo disease (vs. ADT)

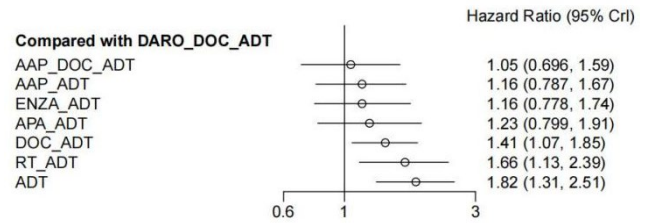

B: OS for de novo disease (vs. DARO\_DOC\_ADT)

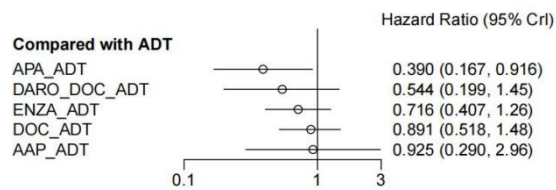

C: OS for patients with previous local treatment (vs. ADT)

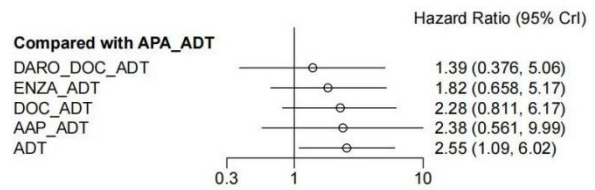

D: OS for patients with previous local treatment (vs. APA\_ADT)



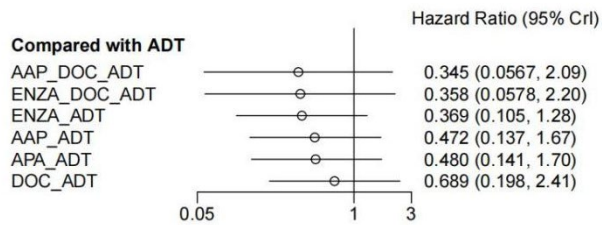

E: rPFS (vs.ADT)

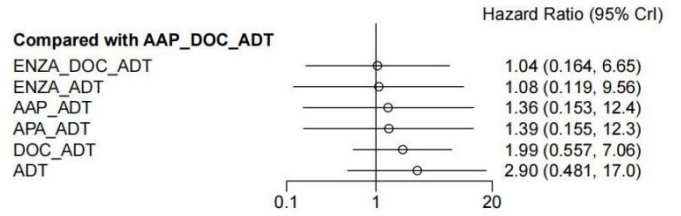

F: rPFS (vs.ENZA\_DOC\_ADT)

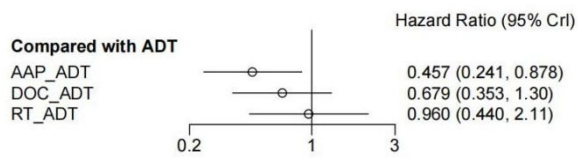

G: PFS (vs.ADT)

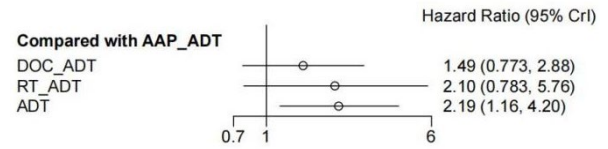

H: PFS (vs.AAP)

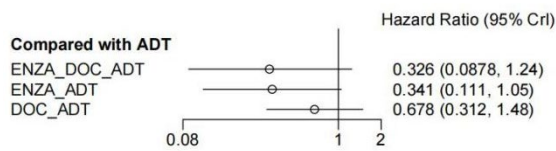

I: cPFS (vs.ADT)

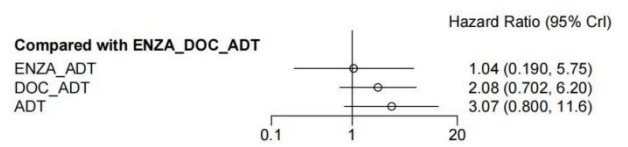

J: cPFS (vs.ENZA\_DOC\_ADT)

**Supplementary Material 8: Relative effect estimates for all possible treatment comparisons**

Overall survival, hazard ratio (95% CI)

|                          |                          |                          |                   |                          |                          |                          |                          |                                |
|--------------------------|--------------------------|--------------------------|-------------------|--------------------------|--------------------------|--------------------------|--------------------------|--------------------------------|
| DARO+DOC+ADT             |                          |                          |                   |                          |                          |                          |                          |                                |
| 0.91 (0.61, 1.34)        | AAP+DOC+ADT              |                          |                   |                          |                          |                          |                          |                                |
| 0.81 (0.54, 1.23)        | 0.90 (0.58, 1.40)        | ENZA+DOC+ADT             |                   |                          |                          |                          |                          |                                |
| <b>0.57 (0.40, 0.80)</b> | <b>0.63 (0.43, 0.92)</b> | 0.70 (0.46, 1.03)        | RT+ADT            |                          |                          |                          |                          |                                |
| 0.86 (0.57, 1.29)        | 0.95 (0.61, 1.47)        | 1.05 (0.67, 1.65)        | 1.51 (1.07, 2.12) | APA+ADT                  |                          |                          |                          |                                |
| 0.87 (0.60, 1.26)        | 0.96 (0.64, 1.45)        | 1.07 (0.70, 1.64)        | 1.53 (1.14, 2.06) | 1.01 (0.71, 1.47)        | ENZA+ADT                 |                          |                          |                                |
| 0.79 (0.56, 1.08)        | 0.87 (0.60, 1.24)        | 0.97 (0.65, 1.41)        | 1.38 (1.06, 1.76) | 0.92 (0.66, 1.26)        | 0.90 (0.67, 1.20)        | AAP+ADT                  |                          |                                |
| <b>0.68 (0.53, 0.88)</b> | 0.75 (0.55, 1.01)        | 0.83 (0.60, 1.14)        | 1.20 (0.95, 1.52) | 0.79 (0.58, 1.10)        | 0.78 (0.59, 1.04)        | 0.86 (0.71, 1.09)        | DOC+ADT                  |                                |
| <b>0.52 (0.39, 0.70)</b> | <b>0.58 (0.41, 0.81)</b> | <b>0.64 (0.45, 0.92)</b> | 0.92 (0.76, 1.11) | <b>0.61 (0.46, 0.81)</b> | <b>0.60 (0.47, 0.76)</b> | <b>0.67 (0.57, 0.80)</b> | <b>0.77 (0.66, 0.89)</b> | Placebo/No treatment /NSAA+ADT |

Generalized progression-free survival, hazard ratio (95% CI)

|                          |                          |                   |                          |                          |                          |                          |                                |
|--------------------------|--------------------------|-------------------|--------------------------|--------------------------|--------------------------|--------------------------|--------------------------------|
| AAP+DOC+ADT              |                          |                   |                          |                          |                          |                          |                                |
| 1.02 (0.70, 1.48)        | ENZA+DOC+ADT             |                   |                          |                          |                          |                          |                                |
| <b>0.35 (0.24, 0.49)</b> | <b>0.34 (0.24, 0.48)</b> | RT+ADT            |                          |                          |                          |                          |                                |
| 0.69 (0.47, 1.03)        | 0.68 (0.45, 1.01)        | 2.00 (1.45, 2.77) | APA+ADT                  |                          |                          |                          |                                |
| 0.94 (0.65, 1.36)        | 0.92 (0.64, 1.34)        | 2.72 (2.03, 3.63) | 1.36 (0.97, 1.91)        | ENZA+ADT                 |                          |                          |                                |
| <b>0.72 (0.52, 0.99)</b> | <b>0.71 (0.51, 0.97)</b> | 2.08 (1.64, 2.66) | 1.05 (0.77, 1.42)        | 0.77 (0.59, 1.00)        | AAP+ADT                  |                          |                                |
| <b>0.50 (0.38, 0.65)</b> | <b>0.49 (0.37, 0.64)</b> | 1.44 (1.14, 1.83) | <b>0.72 (0.54, 0.96)</b> | <b>0.53 (0.41, 0.68)</b> | <b>0.69 (0.58, 0.83)</b> | DOC+ADT                  |                                |
| <b>0.33 (0.25, 0.45)</b> | <b>0.32 (0.24, 0.44)</b> | 0.96 (0.80, 1.16) | <b>0.48 (0.37, 0.63)</b> | <b>0.35 (0.28, 0.44)</b> | <b>0.46 (0.40, 0.53)</b> | <b>0.67 (0.59, 0.76)</b> | Placebo/No treatment /NSAA+ADT |

Overall survival for patients with high volume disease, hazard ratio (95% CI)

|                          |                   |                          |                   |                          |                          |                          |                                   |
|--------------------------|-------------------|--------------------------|-------------------|--------------------------|--------------------------|--------------------------|-----------------------------------|
| AAP+DOC+ADT              |                   |                          |                   |                          |                          |                          |                                   |
| 0.75 (0.39, 1.40)        | ENZA+DOC+ADT      |                          |                   |                          |                          |                          |                                   |
| <b>0.49 (0.28, 0.87)</b> | 0.66 (0.35, 1.28) | RT+ADT                   |                   |                          |                          |                          |                                   |
| 0.75 (0.42, 1.34)        | 1.01 (0.52, 0.99) | 1.52 (0.93, 2.54)        | APA+ADT           |                          |                          |                          |                                   |
| 0.80 (0.47, 1.38)        | 1.08 (0.58, 2.01) | <b>1.63 (1.05, 2.55)</b> | 1.06 (0.67, 1.71) | ENZA+ADT                 |                          |                          |                                   |
| 0.85 (0.51, 1.46)        | 1.15 (0.63, 2.11) | <b>1.75 (1.14, 2.70)</b> | 1.14 (0.73, 1.78) | 1.07 (0.72, 1.60)        | AAP+ADT                  |                          |                                   |
| 0.72 (0.49, 1.08)        | 0.97 (0.59, 1.61) | 1.47 (0.96, 2.20)        | 0.96 (0.62, 1.48) | 0.90 (0.62, 1.31)        | 0.84 (0.59, 1.18)        | DOC+ADT                  |                                   |
| <b>0.52 (0.33, 0.83)</b> | 0.71 (0.41, 1.22) | 1.07 (0.76, 1.51)        | 0.70 (0.48, 1.02) | <b>0.66 (0.49, 0.89)</b> | <b>0.61 (0.47, 0.79)</b> | <b>0.73 (0.58, 0.91)</b> | Placebo/No treatment<br>/NSAA+ADT |

Overall survival for patients with low volume disease, hazard ratio (95% CI)

|                   |                   |                   |                   |                          |                   |                   |                                   |
|-------------------|-------------------|-------------------|-------------------|--------------------------|-------------------|-------------------|-----------------------------------|
| AAP+DOC+ADT       |                   |                   |                   |                          |                   |                   |                                   |
| 1.26 (0.33, 4.74) | ENZA+DOC+ADT      |                   |                   |                          |                   |                   |                                   |
| 1.13 (0.40, 3.21) | 0.88 (0.24, 3.38) | RT+ADT            |                   |                          |                   |                   |                                   |
| 1.47 (0.50, 4.34) | 1.15 (0.30, 4.40) | 1.30 (0.52, 3.38) | APA+ADT           |                          |                   |                   |                                   |
| 1.42 (0.54, 4.06) | 1.11 (0.32, 4.20) | 1.27 (1.57, 3.07) | 0.97 (0.42, 2.45) | ENZA+ADT                 |                   |                   |                                   |
| 1.12 (0.43, 2.95) | 0.87 (0.25, 3.13) | 1.00 (0.45, 2.24) | 0.77 (0.34, 1.78) | 0.79 (0.37, 1.58)        | AAP+ADT           |                   |                                   |
| 0.83 (0.40, 1.75) | 0.65 (0.22, 1.94) | 0.74 (0.35, 1.56) | 0.57 (0.25, 1.25) | 0.58 (0.30, 1.08)        | 0.74 (0.39, 1.37) | DOC+ADT           |                                   |
| 0.77 (0.33, 1.78) | 0.60 (0.19, 1.92) | 0.68 (0.36, 1.28) | 0.52 (0.26, 1.05) | <b>0.53 (0.31, 0.88)</b> | 0.68 (0.41, 1.13) | 0.92 (0.62, 1.37) | Placebo/No treatment<br>/NSAA+ADT |

Overall survival for patients with visceral metastasis, hazard ratio (95% CI)

|                   |                   |                   |                   |                   |                                   |
|-------------------|-------------------|-------------------|-------------------|-------------------|-----------------------------------|
| DARO+DOC+ADT      |                   |                   |                   |                   |                                   |
| 0.55 (0.13, 2.29) | APA+ADT           |                   |                   |                   |                                   |
| 0.38 (0.10, 1.44) | 0.69 (0.24, 1.96) | ENZA+ADT          |                   |                   |                                   |
| 0.73 (0.18, 3.02) | 1.31 (0.43, 4.15) | 1.91 (0.70, 5.18) | AAP+ADT           |                   |                                   |
| 0.79 (0.37, 1.74) | 1.43 (0.42, 4.77) | 2.11 (0.71, 6.07) | 1.10 (0.34, 3.50) | DOC+ADT           |                                   |
| 0.42 (0.13, 1.34) | 0.76 (0.33, 1.75) | 1.11 (0.58, 2.09) | 0.58 (0.27, 1.26) | 0.53 (0.22, 1.27) | Placebo/No treatment<br>/NSAA+ADT |

High grade AE, Odds ratio (95% CI)

|                         |                          |                   |                   |                          |                          |                          |                                   |
|-------------------------|--------------------------|-------------------|-------------------|--------------------------|--------------------------|--------------------------|-----------------------------------|
| DARO+DOC+ADT            |                          |                   |                   |                          |                          |                          |                                   |
| 0.73 (0.31, 1.73)       | AAP+DOC+ADT              |                   |                   |                          |                          |                          |                                   |
| 2.53 (0.84,6.90)        | <b>3.46 (1.19, 9.92)</b> | RT+ADT            |                   |                          |                          |                          |                                   |
| 1.85 (0.65, 5.17)       | 2.55 (0.90, 7.22)        | 0.73 (0.31, 1.64) | APA+ADT           |                          |                          |                          |                                   |
| 1.44 (0.56, 3.75)       | 1.98 (0.78, 5.27)        | 0.57 (0.28, 1.18) | 0.78 (0.38, 1.62) | ENZA+ADT                 |                          |                          |                                   |
| 1.36 (0.53, 3.34)       | 1.86 (0.71, 4.66)        | 0.54 (0.26, 1.08) | 0.73 (0.35, 1.49) | 0.94 (0.52, 1.69)        | AAP+ADT                  |                          |                                   |
| 1.13 (0.63, 2.03)       | 1.56 (0.86, 2.85)        | 0.45 (0.20, 1.03) | 0.61 (0.27, 1.37) | 0.79 (0.39, 1.61)        | 0.84 (0.43, 1.72)        | DOC+ADT                  |                                   |
| <b>2.59 (1.11,6.09)</b> | <b>3.56 (1.51, 8.43)</b> | 1.03 (0.57, 1.87) | 1.39 (0.76, 2.55) | <b>1.81 (1.18, 2.77)</b> | <b>1.92 (1.27, 2.95)</b> | <b>2.28 (1.26, 4.16)</b> | Placebo/No treatment<br>/NSAA+ADT |

Overall survival for patients with de novo disease, hazard ratio (95% CI)

|                          |                          |                          |                          |                          |                          |                   |                                   |
|--------------------------|--------------------------|--------------------------|--------------------------|--------------------------|--------------------------|-------------------|-----------------------------------|
| DARO+DOC+ADT             |                          |                          |                          |                          |                          |                   |                                   |
| 0.95(0.63, 1.44)         | AAP+DOC+ADT              |                          |                          |                          |                          |                   |                                   |
| 0.86 (0.59, 1.26)        | 0.91(0.61, 1.38)         | AAP+ADT                  |                          |                          |                          |                   |                                   |
| 0.86 (0.58, 1.30)        | 0.91 (0.60, 1.40)        | 0.997 (0.73, 1.35)       | ENZA+ADT                 |                          |                          |                   |                                   |
| 0.81 (0.53, 1.26)        | 0.86 (0.54, 1.36)        | 0.94 (0.66, 1.33)        | 0.94 (0.64, 1.38)        | APA+ADT                  |                          |                   |                                   |
| <b>0.71 (0.54, 0.94)</b> | 0.75 (0.55, 1.02)        | 0.83 (0.63, 1.06)        | 0.823 (0.61, 1.11)       | 0.88 (0.62, 1.24)        | DOC+ADT                  |                   |                                   |
| <b>0.60 (0.41, 0.89)</b> | <b>0.64 (0.43, 0.96)</b> | <b>0.70 (0.53, 0.92)</b> | <b>0.70 (0.52, 0.95)</b> | 0.74(0.52, 1.07)         | 0.85 (0.66, 1.11)        | RT+ADT            |                                   |
| <b>0.55 (0.40, 0.76)</b> | <b>0.58 (0.41, 0.83)</b> | <b>0.64 (0.52, 0.77)</b> | <b>0.64 (0.51, 0.81)</b> | <b>0.68 (0.51, 0.91)</b> | <b>0.77 (0.65, 0.93)</b> | 0.91 (0.75, 1.11) | Placebo/No treatment<br>/NSAA+ADT |

Overall survival for patients with previous local treatment, hazard ratio (95% CI)

|                          |                   |                   |                   |                   |                                   |
|--------------------------|-------------------|-------------------|-------------------|-------------------|-----------------------------------|
| APA+ADT                  |                   |                   |                   |                   |                                   |
| 0.72 (0.19, 2.71)        | DARO+DOC+ADT      |                   |                   |                   |                                   |
| 0.54 (0.20, 1.50)        | 0.76 (0.24, 2.33) | ENZA+ADT          |                   |                   |                                   |
| 0.44 (0.16, 1.20)        | 0.61 (0.26, 1.42) | 0.81 (0.38, 1.74) | DOC+ADT           |                   |                                   |
| 0.41 (0.10, 1.80)        | 0.58 (0.13, 2.65) | 0.76 (0.21, 2.78) | 0.95 (0.26, 3.30) | AAP+ADT           |                                   |
| <b>0.39 (0.17, 0.92)</b> | 0.54 (0.20, 1.45) | 0.72 (0.41, 1.26) | 0.89 (0.52, 1.48) | 0.93 (0.29, 2.96) | Placebo/No treatment<br>/NSAA+ADT |

AAP: abiraterone acetate and prednisone; ADT: androgen deprivation therapy; APA: apalutamide; CI: confidence interval; DARO: darolutamide; DOC: docetaxel; ENZA: enzalutamide; NSAA: non-steroidal anti-androgen, including nilutamide, flutamide or bicalutamide; RT: radiotherapy.

**Supplementary Material 9: OS/PFS ranking and ranking probability of competing interventions based on overall population**

A. OS for overall population

| Probability for place |              | 1st  | 2nd  | 3rd  | 4th  | 5th  | 6th  | 7th  | 8th  | 9th  |
|-----------------------|--------------|------|------|------|------|------|------|------|------|------|
| Rank                  | Treatment    |      |      |      |      |      |      |      |      |      |
| 1                     | DARO+DOC+ADT | 0.49 | 0.26 | 0.13 | 0.07 | 0.03 | 0.01 | 0    | 0    | 0    |
| 2                     | AAP+DOC+ADT  | 0.20 | 0.23 | 0.20 | 0.15 | 0.11 | 0.08 | 0.02 | 0    | 0    |
| 3                     | ENZA+ADT     | 0.11 | 0.19 | 0.24 | 0.21 | 0.15 | 0.08 | 0.02 | 0    | 0    |
| 4                     | APA+ADT      | 0.11 | 0.16 | 0.20 | 0.20 | 0.17 | 0.08 | 0.02 | 0    | 0    |
| 5                     | ENZA+DOC+ADT | 0.08 | 0.12 | 0.15 | 0.16 | 0.17 | 0.20 | 0.10 | 0.03 | 0.01 |
| 6                     | AAP+ADT      | 0.01 | 0.03 | 0.09 | 0.20 | 0.32 | 0.28 | 0.06 | 0.01 | 0    |
| 7                     | DOC+ADT      | 0    | 0    | 0    | 0.01 | 0.04 | 0.22 | 0.68 | 0.04 | 0    |
| 8                     | RT+ADT       | 0    | 0    | 0    | 0    | 0.01 | 0.02 | 0.07 | 0.74 | 0.16 |
| 9                     | ADT alone    | 0    | 0    | 0    | 0    | 0    | 0    | 0    | 0.17 | 0.83 |

B. Generalized PFS for overall population

| Probability for place |              | 1st  | 2nd  | 3rd  | 4th  | 5th  | 6th  | 7th  | 8th  |
|-----------------------|--------------|------|------|------|------|------|------|------|------|
| Rank                  | Treatment    |      |      |      |      |      |      |      |      |
| 1                     | ENZA+DOC+ADT | 0.45 | 0.33 | 0.20 | 0.02 | 0.01 | 0    | 0    | 0    |
| 2                     | AAP+DOC+ADT  | 0.36 | 0.35 | 0.25 | 0.03 | 0.01 | 0    | 0    | 0    |
| 3                     | ENZA+ADT     | 0.19 | 0.30 | 0.46 | 0.04 | 0.01 | 0    | 0    | 0    |
| 4                     | AAP+ADT      | 0    | 0.01 | 0.04 | 0.59 | 0.37 | 0    | 0    | 0    |
| 5                     | APA+ADT      | 0    | 0.01 | 0.01 | 0.32 | 0.59 | 0.02 | 0    | 0    |
| 6                     | DOC+ADT      | 0    | 0    | 0    | 0    | 0.02 | 0.98 | 0    | 0    |
| 7                     | RT+ADT       | 0    | 0    | 0    | 0    | 0    | 0    | 0.69 | 0.31 |
| 8                     | ADT alone    | 0    | 0    | 0    | 0    | 0    | 0    | 0.31 | 0.69 |

C. OS for patients with high volume disease

| Probability for place |              | 1st  | 2nd  | 3rd  | 4th  | 5th  | 6th  | 7th  | 8th  |
|-----------------------|--------------|------|------|------|------|------|------|------|------|
| Rank                  | Treatment    |      |      |      |      |      |      |      |      |
| 1                     | AAP+DOC+ADT  | 0.61 | 0.18 | 0.10 | 0.06 | 0.03 | 0.02 | 0    | 0    |
| 2                     | AAP+ADT      | 0.15 | 0.33 | 0.26 | 0.15 | 0.07 | 0.03 | 0    | 0    |
| 3                     | ENZA+ADT     | 0.08 | 0.19 | 0.24 | 0.21 | 0.16 | 0.11 | 0.01 | 0    |
| 4                     | APA+ADT      | 0.06 | 0.11 | 0.16 | 0.20 | 0.19 | 0.23 | 0.03 | 0.01 |
| 5                     | ENZA+DOC+ADT | 0.10 | 0.16 | 0.12 | 0.13 | 0.14 | 0.23 | 0.06 | 0.06 |
| 6                     | DOC+ADT      | 0    | 0.02 | 0.10 | 0.24 | 0.38 | 0.24 | 0.01 | 0    |
| 7                     | ADT alone    | 0    | 0    | 0    | 0    | 0.01 | 0.08 | 0.65 | 0.25 |
| 8                     | RT+ADT       | 0    | 0    | 0.01 | 0.01 | 0.02 | 0.06 | 0.24 | 0.66 |



D. OS for patients with low volume disease

| Probability for place |              | 1st  | 2nd  | 3rd  | 4th  | 5th  | 6th  | 7th  | 8th  |
|-----------------------|--------------|------|------|------|------|------|------|------|------|
| Rank                  | Treatment    |      |      |      |      |      |      |      |      |
| 1                     | APA+ADT      | 0.31 | 0.26 | 0.17 | 0.23 | 0.07 | 0.04 | 0.02 | 0.02 |
| 2                     | ENZA+ADT     | 0.24 | 0.30 | 0.22 | 0.13 | 0.07 | 0.03 | 0.01 | 0    |
| 3                     | ENZA+DOC+ADT | 0.29 | 0.13 | 0.11 | 0.10 | 0.09 | 0.08 | 0.06 | 0.14 |
| 4                     | AAP+ADT      | 0.04 | 0.10 | 0.19 | 0.24 | 0.22 | 0.12 | 0.06 | 0.02 |
| 5                     | RT+ADT       | 0.05 | 0.11 | 0.18 | 0.23 | 0.20 | 0.12 | 0.06 | 0.04 |
| 6                     | AAP+DOC+ADT  | 0.06 | 0.09 | 0.11 | 0.14 | 0.16 | 0.16 | 0.11 | 0.16 |
| 7                     | DOC+ADT      | 0    | 0    | 0.01 | 0.04 | 0.13 | 0.29 | 0.38 | 0.15 |
| 8                     | ADT alone    | 0    | 0    | 0    | 0.01 | 0.06 | 0.16 | 0.30 | 0.47 |

E. OS for patients with vesical metastasis

| Probability for place |              | 1st  | 2nd  | 3rd  | 4th  | 5th  | 6th  |
|-----------------------|--------------|------|------|------|------|------|------|
| Rank                  | Treatment    |      |      |      |      |      |      |
| 1                     | DARO+DOC+ADT | 0.59 | 0.20 | 0.11 | 0.05 | 0.03 | 0.03 |
| 2                     | DOC+ADT      | 0.11 | 0.46 | 0.26 | 0.11 | 0.04 | 0.02 |
| 3                     | AAP+ADT      | 0.21 | 0.20 | 0.35 | 0.16 | 0.04 | 0.03 |
| 4                     | APA+ADT      | 0.08 | 0.11 | 0.19 | 0.35 | 0.13 | 0.13 |
| 5                     | ADT alone    | 0    | 0    | 0.04 | 0.18 | 0.53 | 0.24 |
| 6                     | ENZA+ADT     | 0.01 | 0.02 | 0.05 | 0.14 | 0.23 | 0.55 |

F. Grade 3-5 AEs for overall population

| Probability for place |              | 1st  | 2nd  | 3rd  | 4th  | 5th  | 6th  | 7th  | 8th  |
|-----------------------|--------------|------|------|------|------|------|------|------|------|
| Rank                  | Treatment    |      |      |      |      |      |      |      |      |
| 1                     | ADT alone    | 0.51 | 0.42 | 0.05 | 0.01 | 0    | 0    | 0    | 0    |
| 2                     | RT+ADT       | 0.41 | 0.44 | 0.10 | 0.03 | 0.01 | 0.01 | 0.01 | 0    |
| 3                     | APA+ADT      | 0.05 | 0.09 | 0.64 | 0.11 | 0.05 | 0.02 | 0.02 | 0.01 |
| 4                     | ENZA+ADT     | 0.01 | 0.02 | 0.10 | 0.46 | 0.27 | 0.08 | 0.05 | 0.02 |
| 5                     | AAP+ADT      | 0    | 0.01 | 0.06 | 0.27 | 0.44 | 0.12 | 0.08 | 0.03 |
| 6                     | DOC+ADT      | 0    | 0.01 | 0.02 | 0.06 | 0.14 | 0.58 | 0.18 | 0.01 |
| 7                     | DARO+DOC+ADT | 0.01 | 0.01 | 0.02 | 0.05 | 0.07 | 0.16 | 0.55 | 0.13 |
| 8                     | AAP+DOC+ADT  | 0    | 0    | 0.01 | 0.01 | 0.02 | 0.03 | 0.12 | 0.80 |

G. OS for de novo patients

| Probability for place |              | 1st  | 2nd  | 3rd  | 4th  | 5th  | 6th  | 7th  | 8th  |
|-----------------------|--------------|------|------|------|------|------|------|------|------|
| Rank                  | Treatment    |      |      |      |      |      |      |      |      |
| 1                     | DARO+DOC+ADT | 0.48 | 0.28 | 0.12 | 0.07 | 0.04 | 0.01 | 0    | 0    |
| 2                     | AAP+DOC+ADT  | 0.30 | 0.29 | 0.16 | 0.12 | 0.09 | 0.02 | 0.01 | 0    |
| 3                     | AAP+ADT      | 0.07 | 0.16 | 0.30 | 0.29 | 0.16 | 0.03 | 0    | 0    |
| 4                     | ENZA+ADT     | 0.10 | 0.17 | 0.25 | 0.25 | 0.18 | 0.05 | 0.01 | 0    |
| 5                     | APA+ADT      | 0.06 | 0.10 | 0.16 | 0.21 | 0.29 | 0.15 | 0.03 | 0.01 |
| 6                     | DOC+ADT      | 0    | 0    | 0.01 | 0.06 | 0.21 | 0.65 | 0.07 | 0    |
| 7                     | RT+ADT       | 0    | 0    | 0    | 0.01 | 0.02 | 0.09 | 0.74 | 0.14 |
| 8                     | ADT alone    | 0    | 0    | 0    | 0    | 0    | 0.01 | 0.15 | 0.84 |

H. OS for patients with previous local treatment

| Probability for place |              | 1st  | 2nd  | 3rd  | 4th  | 5th  | 6th  |
|-----------------------|--------------|------|------|------|------|------|------|
| Rank                  | Treatment    |      |      |      |      |      |      |
| 1                     | APA+ADT      | 0.65 | 0.23 | 0.07 | 0.03 | 0.01 | 0.01 |
| 2                     | DARO+DOC+ADT | 0.25 | 0.39 | 0.19 | 0.09 | 0.05 | 0.04 |
| 3                     | ENZA+ADT     | 0.04 | 0.21 | 0.37 | 0.24 | 0.10 | 0.04 |
| 4                     | DOC+ADT      | 0    | 0.04 | 0.17 | 0.32 | 0.29 | 0.17 |
| 5                     | ADT alone    | 0    | 0.01 | 0.04 | 0.18 | 0.44 | 0.33 |
| 6                     | AAP+ADT      | 0.06 | 0.13 | 0.15 | 0.14 | 0.11 | 0.41 |

AAP: abiraterone acetate and prednisone; ADT: androgen deprivation therapy; APA: apalutamide; DARO: darolutamide; DOC: docetaxel; ENZA: enzalutamide; OS: overall survival; PFS: progression free survival; RT: radiotherapy.

## Supplementary Material 10: Trace and density plots

A: Trace and density plots for OS for all population

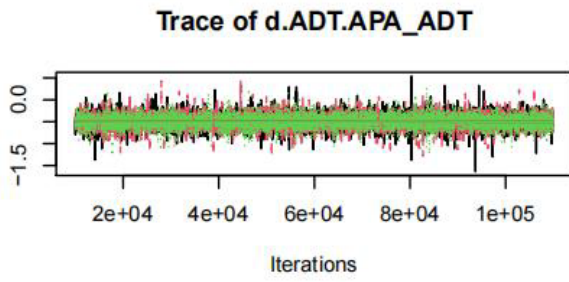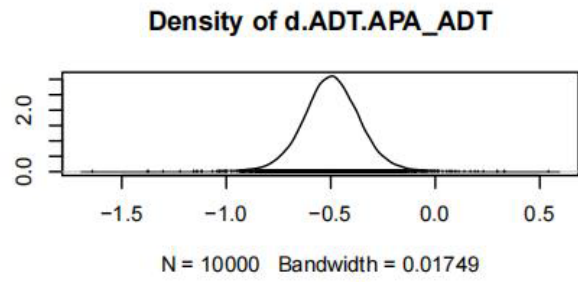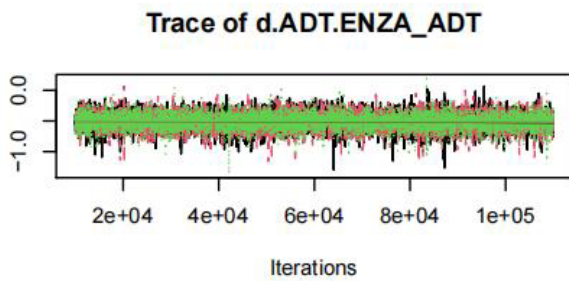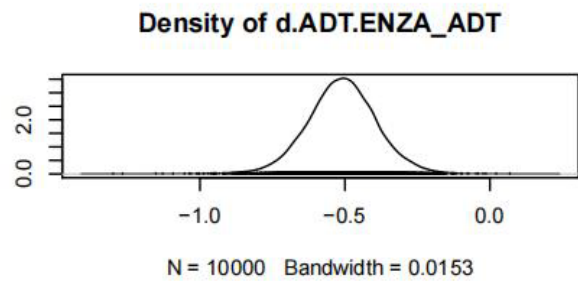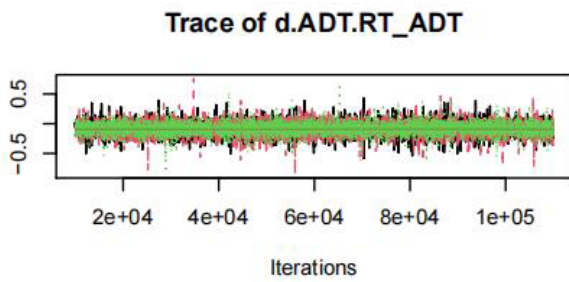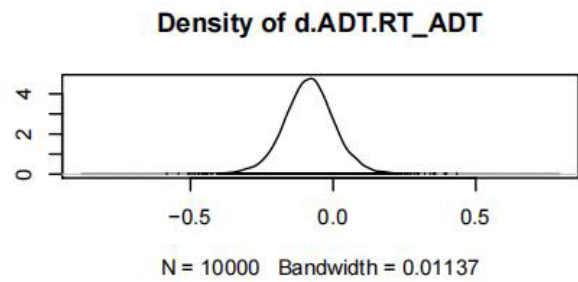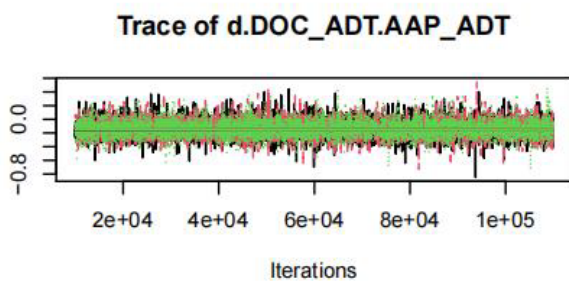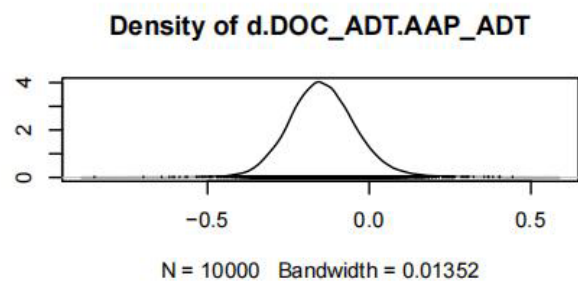

**Trace of d.DOC\_ADT.AAP\_DOC\_ADT**

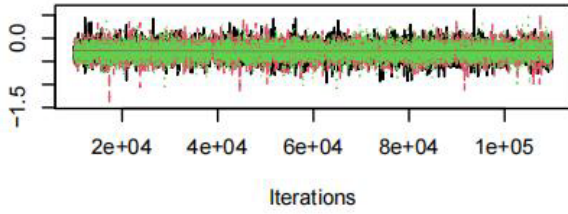

**Density of d.DOC\_ADT.AAP\_DOC\_ADT**

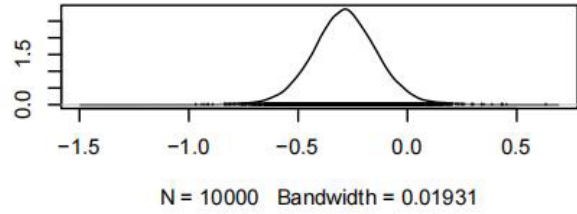

**Trace of d.DOC\_ADT.ADT**

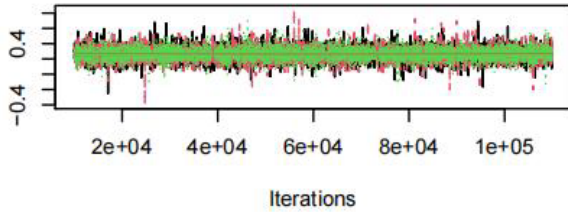

**Density of d.DOC\_ADT.ADT**

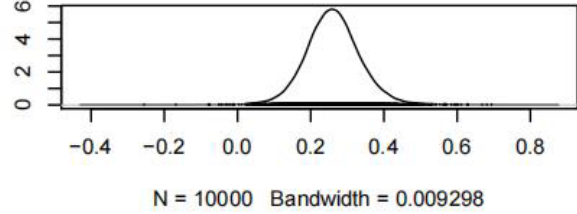

**Trace of d.DOC\_ADT.DARO\_DOC\_ADT**

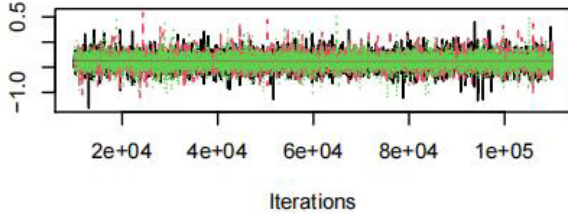

**Density of d.DOC\_ADT.DARO\_DOC\_ADT**

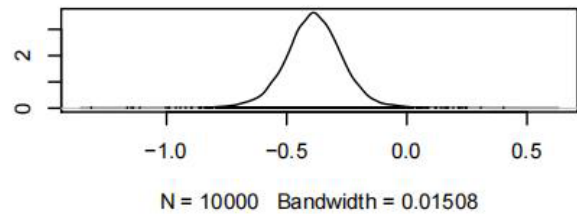

**Trace of d.DOC\_ADT.ENZA\_DOC\_ADT**

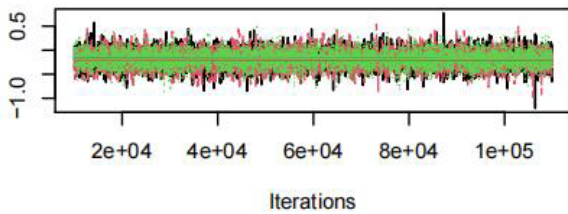

**Density of d.DOC\_ADT.ENZA\_DOC\_ADT**

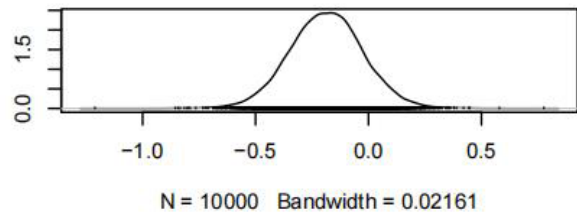

**Trace of sd.d**

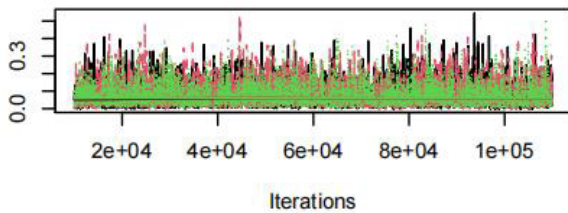

**Density of sd.d**

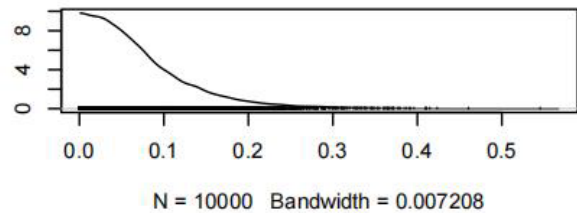

B: Trace and density plots for generalized PFS for all population

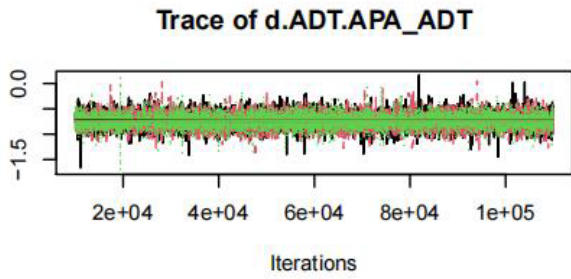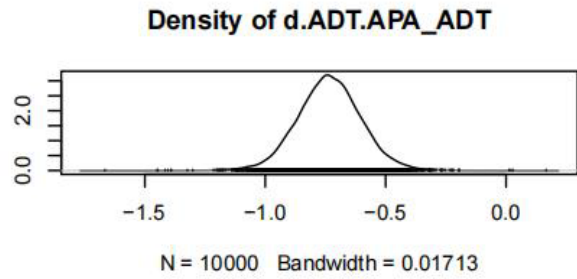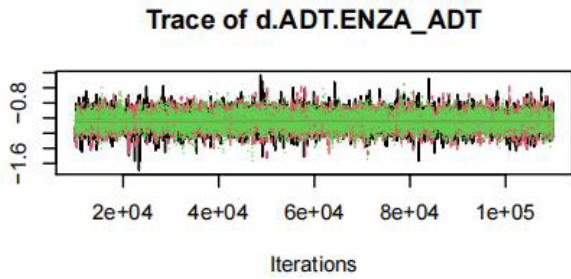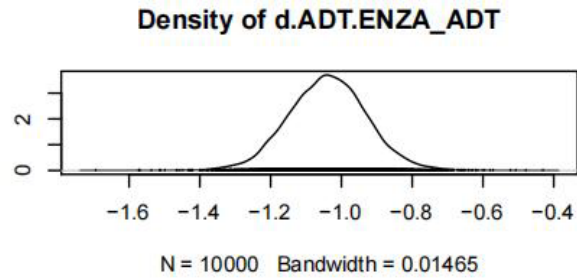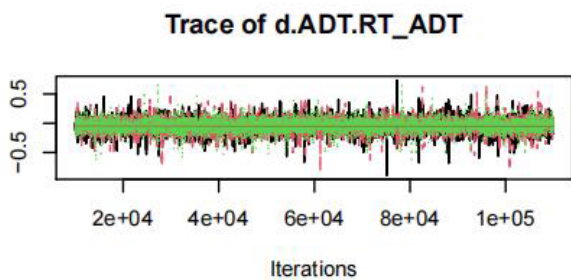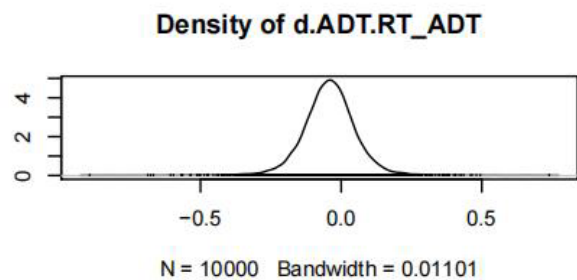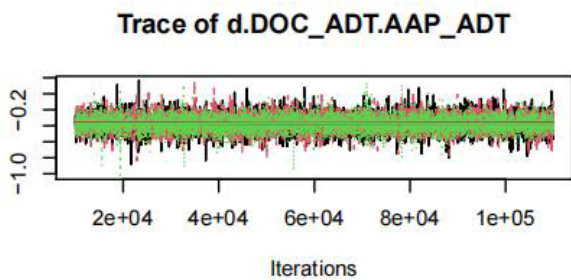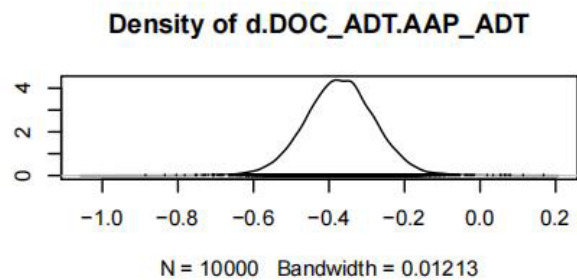



**Trace of d.DOC\_ADT.AAP\_DOC\_ADT**

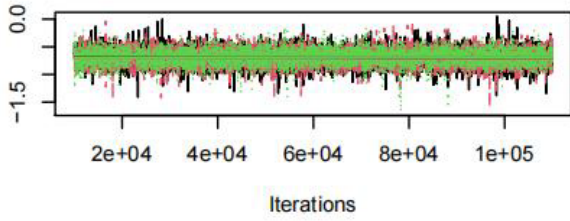

**Density of d.DOC\_ADT.AAP\_DOC\_ADT**

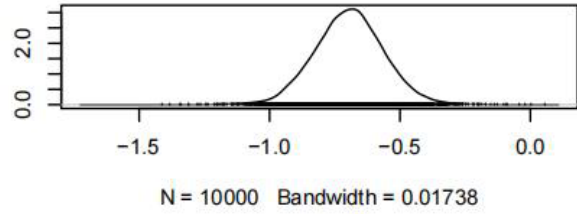

**Trace of d.DOC\_ADT.ADT**

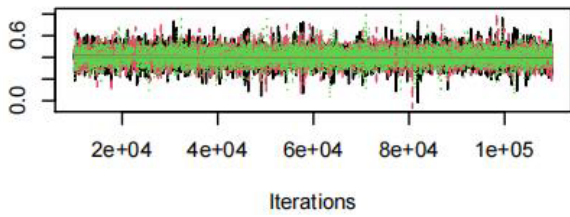

**Density of d.DOC\_ADT.ADT**

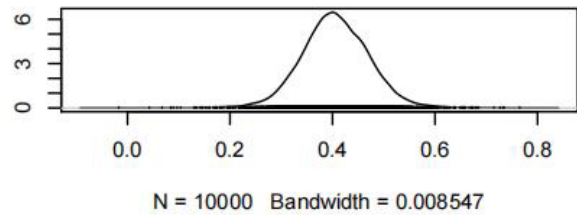

**Trace of d.DOC\_ADT.ENZA\_DOC\_ADT**

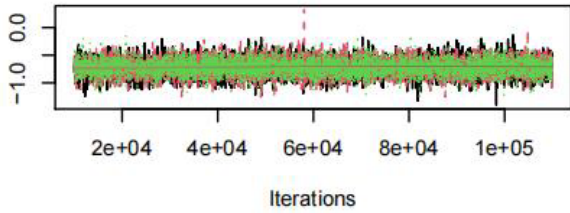

**Density of d.DOC\_ADT.ENZA\_DOC\_ADT**

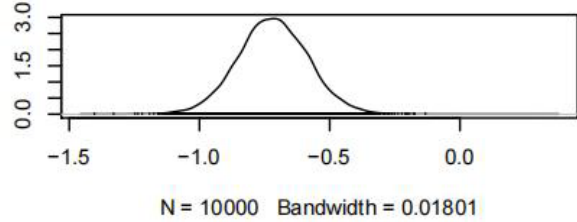

**Trace of sd.d**

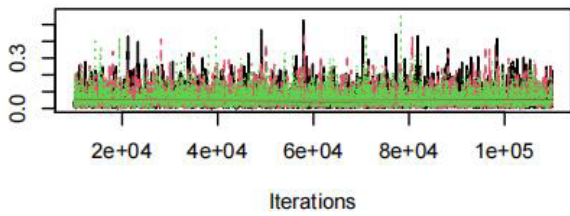

**Density of sd.d**

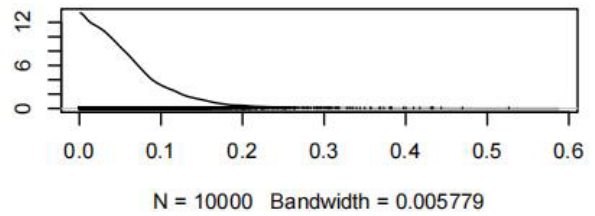

C: Trace and density plots for OS for high volume disease

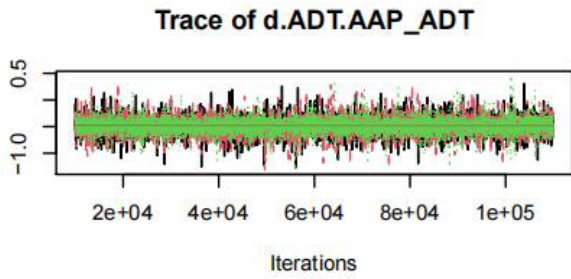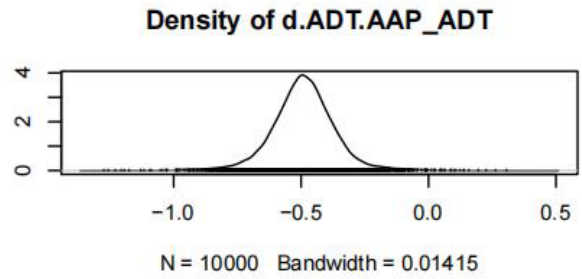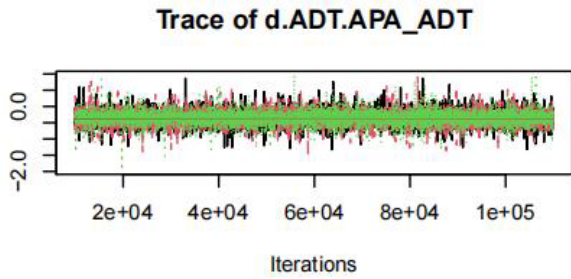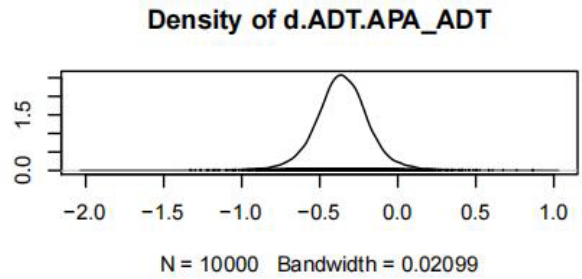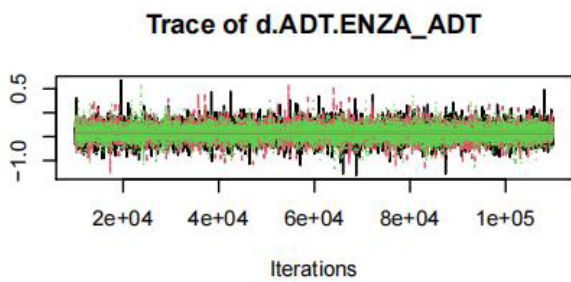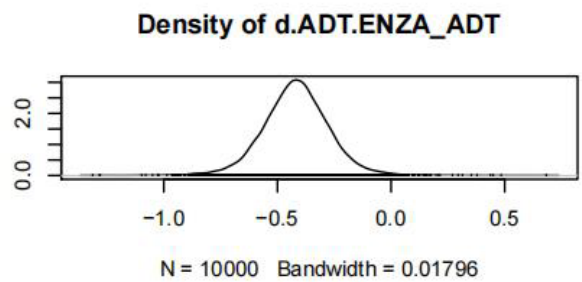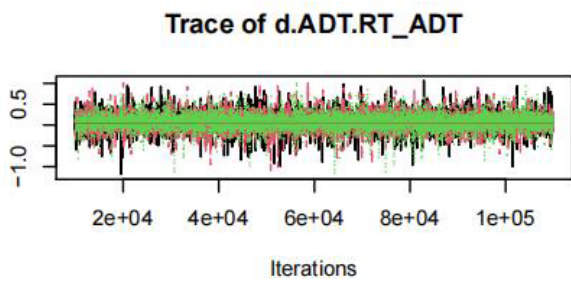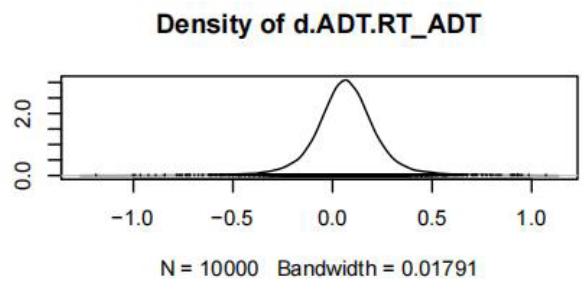

**Trace of d.DOC\_ADT.AAP\_DOC\_ADT**

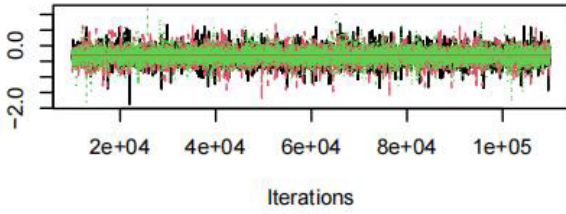

**Density of d.DOC\_ADT.AAP\_DOC\_ADT**

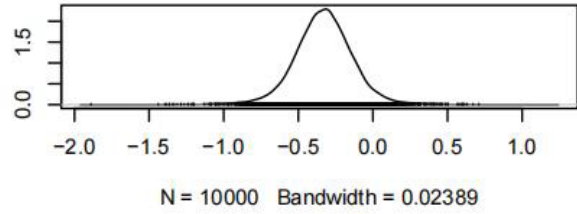

**Trace of d.DOC\_ADT.ADT**

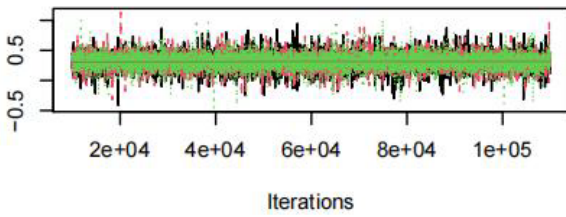

**Density of d.DOC\_ADT.ADT**

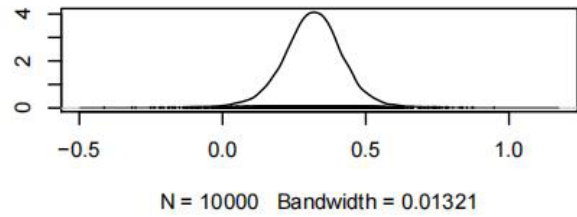

**Trace of d.DOC\_ADT.ENZA\_DOC\_ADT**

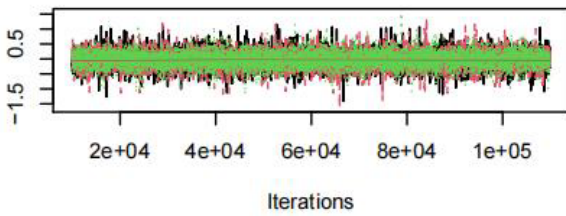

**Density of d.DOC\_ADT.ENZA\_DOC\_ADT**

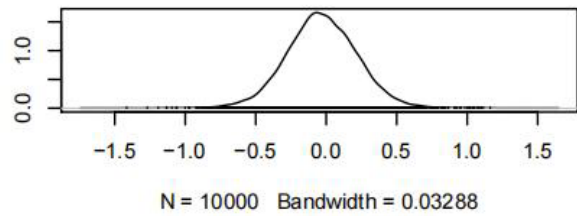

**Trace of sd.d**

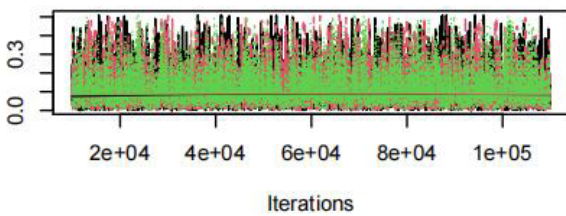

**Density of sd.d**

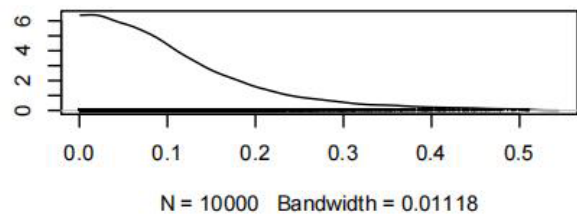

D: Trace and density plots for OS for low volume disease

**Trace of d.ADT.AAP\_ADT**

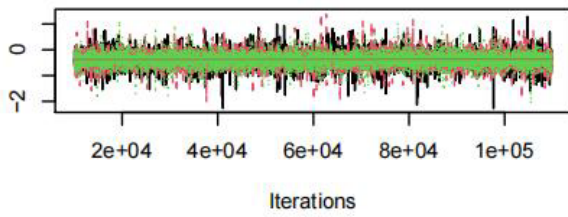

**Density of d.ADT.AAP\_ADT**

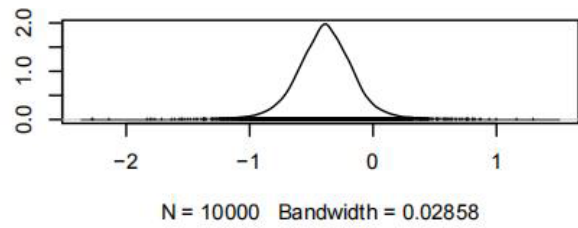

**Trace of d.ADT.APA\_ADT**

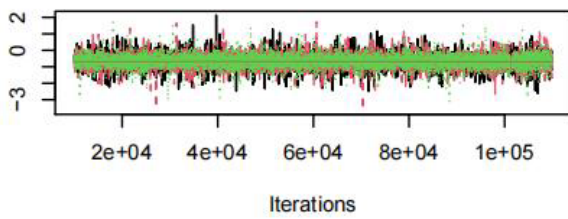

**Density of d.ADT.APA\_ADT**

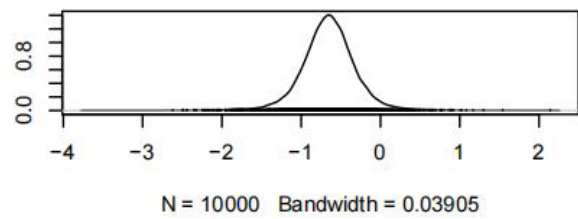

**Trace of d.ADT.ENZA\_ADT**

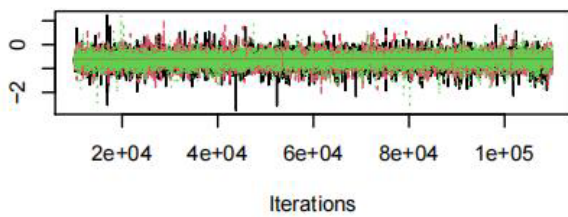

**Density of d.ADT.ENZA\_ADT**

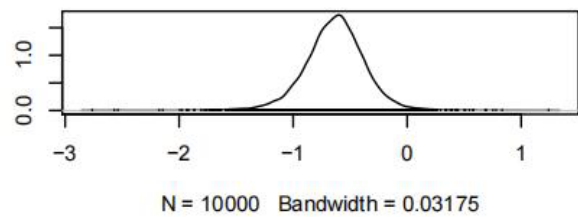

**Trace of d.ADT.RT\_ADT**

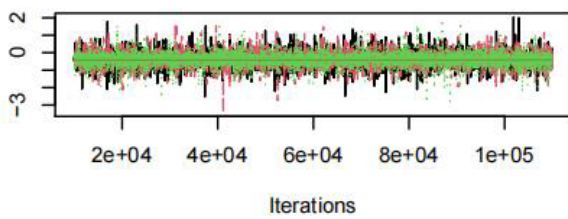

**Density of d.ADT.RT\_ADT**

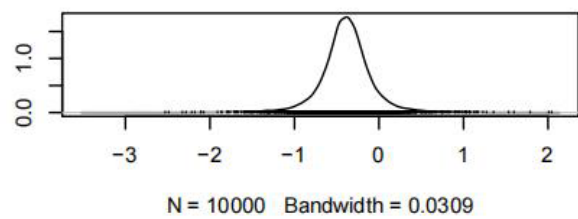



**Trace of d.DOC\_ADT.AAP\_DOC\_ADT**

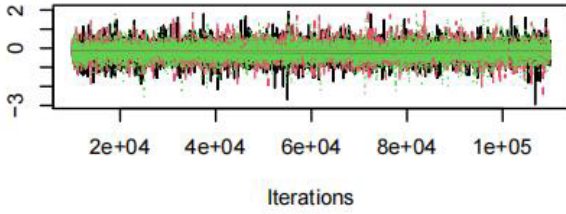

**Density of d.DOC\_ADT.AAP\_DOC\_ADT**

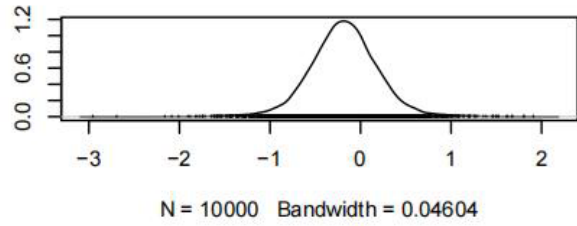

**Trace of d.DOC\_ADT.ADT**

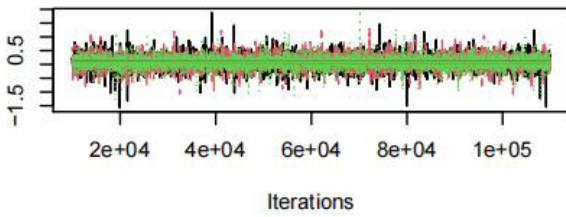

**Density of d.DOC\_ADT.ADT**

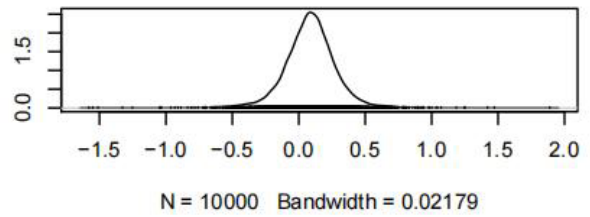

**Trace of d.DOC\_ADT.ENZA\_DOC\_ADT**

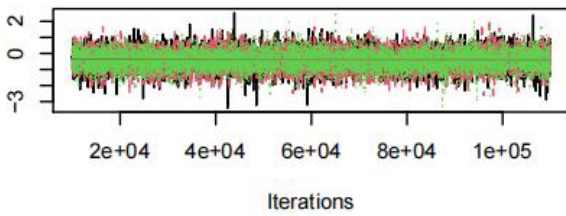

**Density of d.DOC\_ADT.ENZA\_DOC\_ADT**

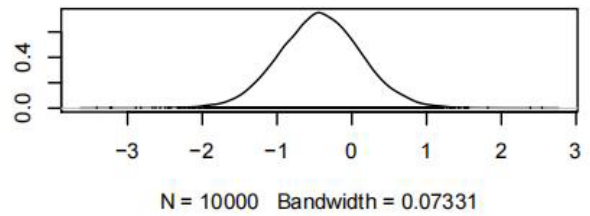

**Trace of sd.d**

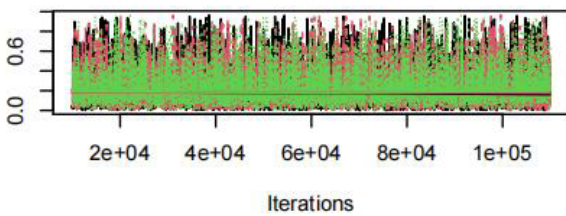

**Density of sd.d**

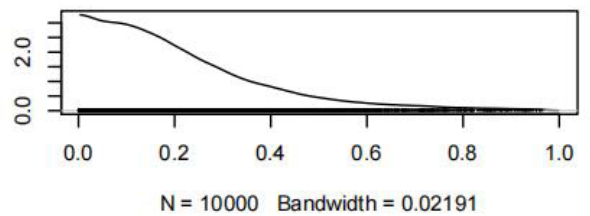

E: Trace and density plots for OS for visceral metastasis

**Trace of d.ADT.AAP\_ADT**

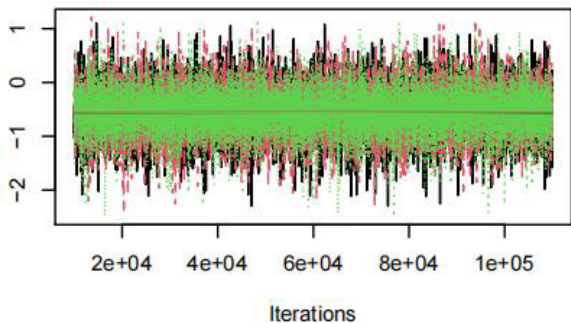

**Density of d.ADT.AAP\_ADT**

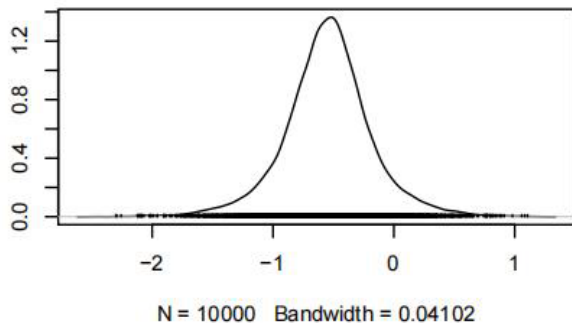

**Trace of d.ADT.APA\_ADT**

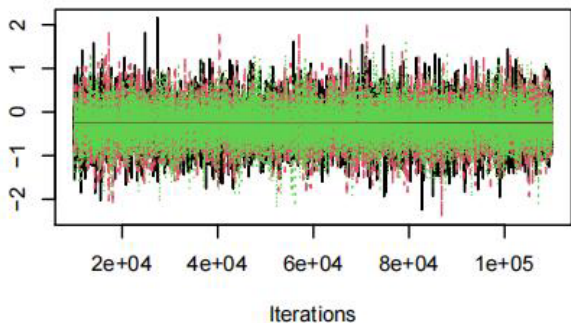

**Density of d.ADT.APA\_ADT**

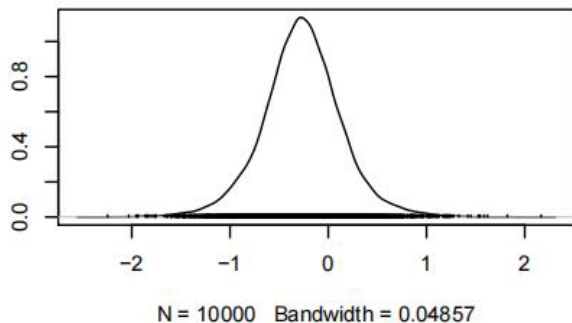

**Trace of d.ADT.DOC\_ADT**

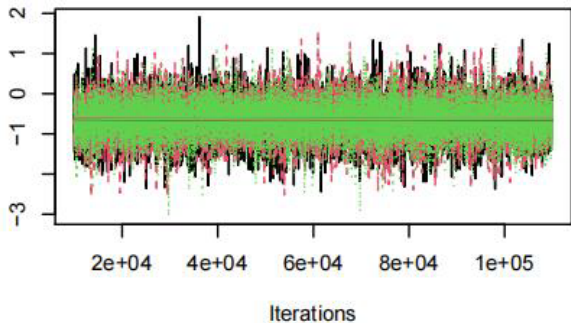

**Density of d.ADT.DOC\_ADT**

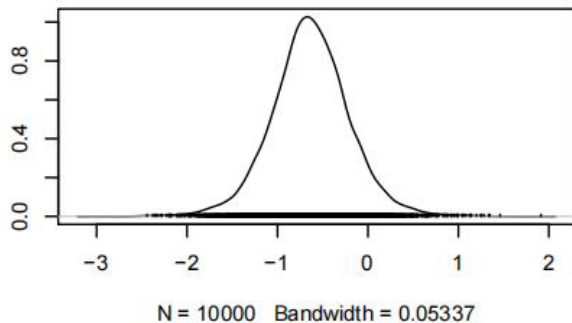

**Trace of d.ADT.ENZA\_ADT**

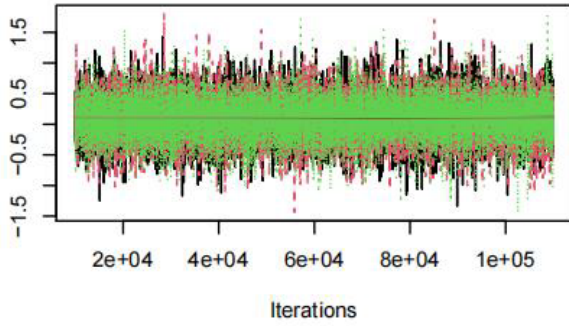

**Density of d.ADT.ENZA\_ADT**

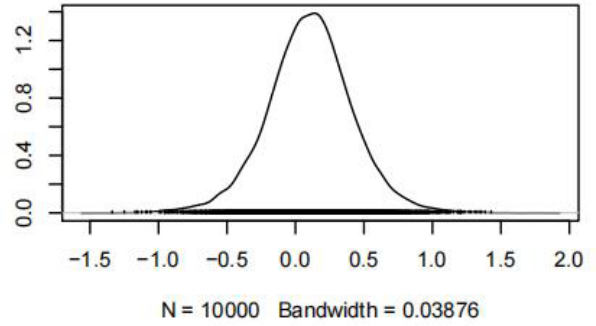

**Trace of d.DOC\_ADT.DARO\_DOC\_ADT**

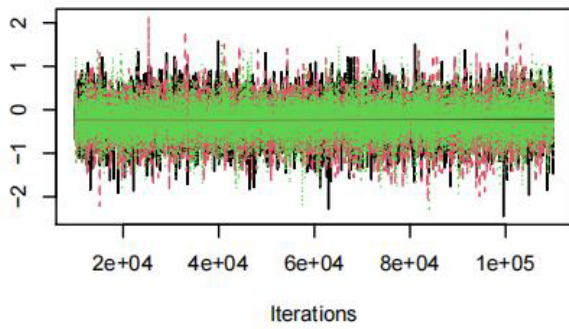

**Density of d.DOC\_ADT.DARO\_DOC\_ADT**

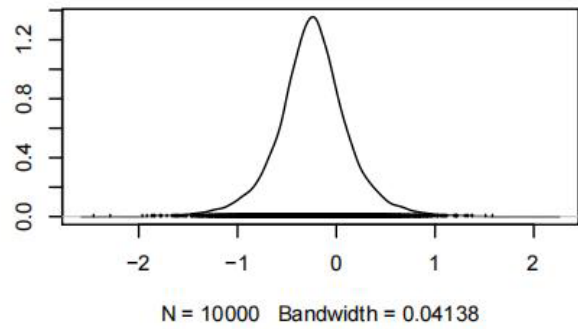

**Trace of sd.d**

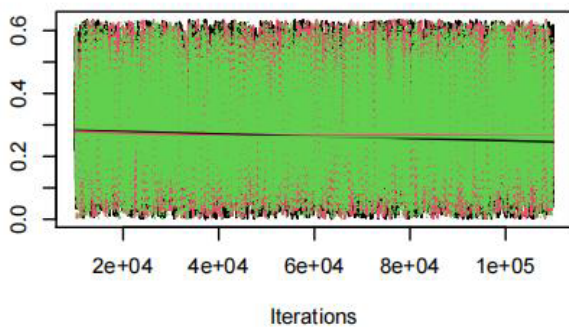

**Density of sd.d**

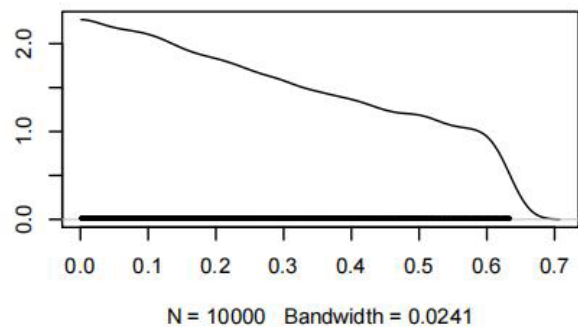

F: Trace and density plots for high grade AE

**Trace of d.ADT.AAP\_ADT**

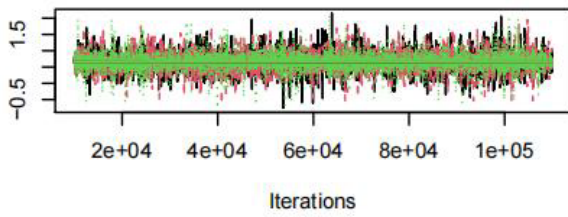

**Density of d.ADT.AAP\_ADT**

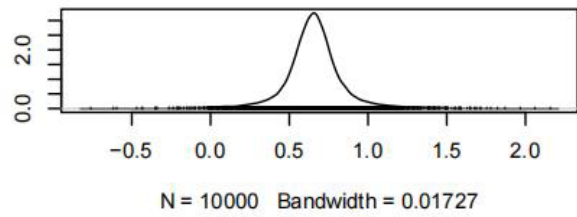

**Trace of d.ADT.APA\_ADT**

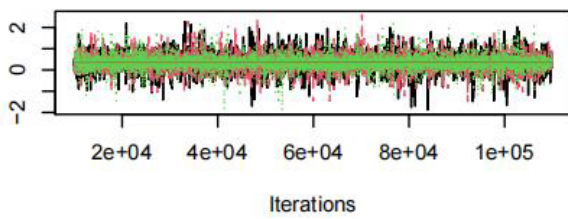

**Density of d.ADT.APA\_ADT**

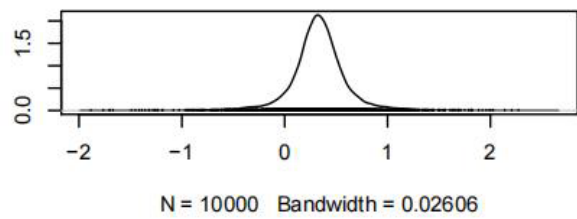

**Trace of d.ADT.DOC\_ADT**

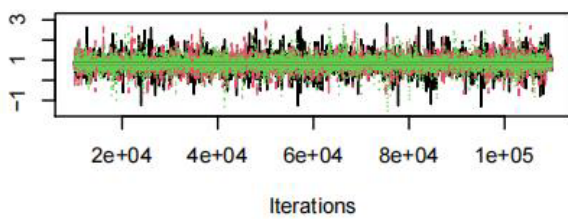

**Density of d.ADT.DOC\_ADT**

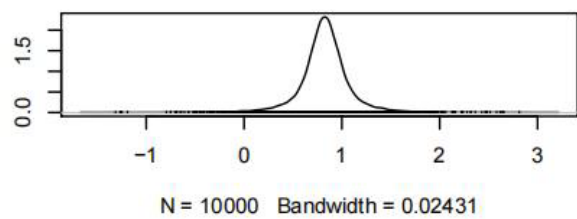

**Trace of d.ADT.ENZA\_ADT**

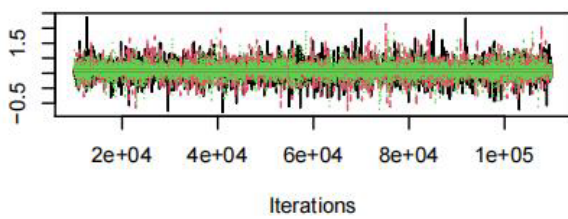

**Density of d.ADT.ENZA\_ADT**

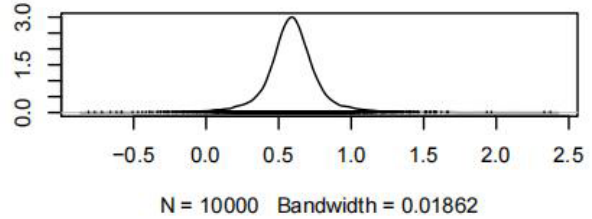



**Trace of d.ADT.RT\_ADT**

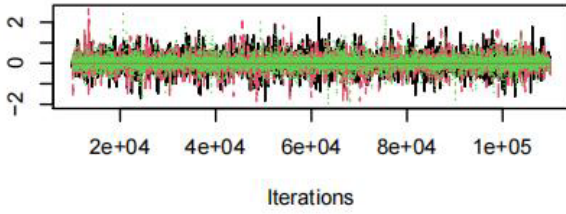

**Density of d.ADT.RT\_ADT**

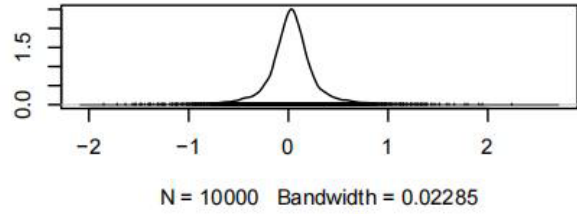

**Trace of d.DOC\_ADT.AAP\_DOC\_ADT**

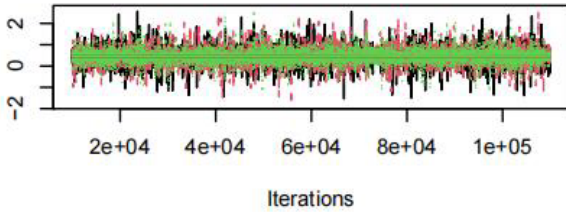

**Density of d.DOC\_ADT.AAP\_DOC\_ADT**

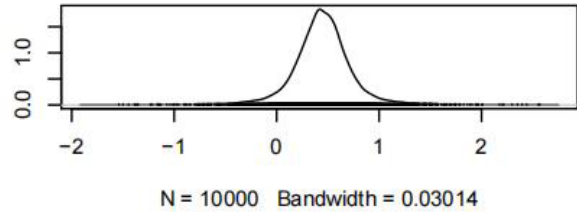

**Trace of d.DOC\_ADT.DARO\_DOC\_ADT**

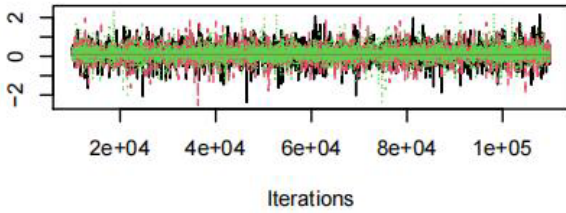

**Density of d.DOC\_ADT.DARO\_DOC\_ADT**

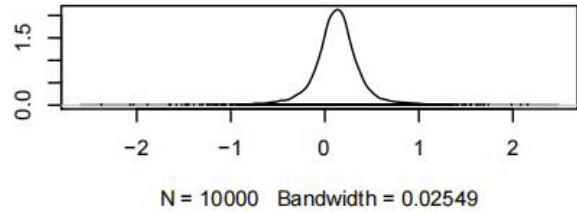

**Trace of sd.d**

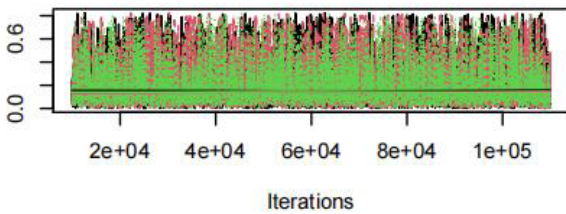

**Density of sd.d**

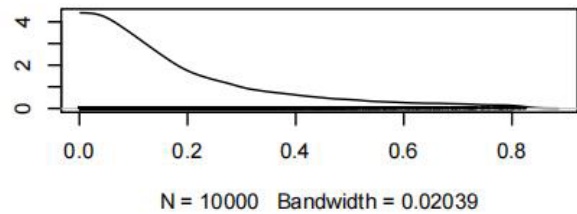

**Supplementary Material 11: Summary of grade 3-5 adverse events in reported trials and corresponding odds ratio**

| STUDY No.         | 3                   | 4                   | 5                   | 7                   | 9                   | 11                  | 12                  | 14                  | 15                  |
|-------------------|---------------------|---------------------|---------------------|---------------------|---------------------|---------------------|---------------------|---------------------|---------------------|
| Trial             | STAMPEDE-arm C      | LATITUDE            | TAMPEDE-arm G       | ENZAMET             | ARCHES              | TITAN               | STAMPEDE-RT         | PEACE-1             | ARASENS             |
| G3-5 AE (Exp.)    | 288/550<br>(52%)    | 411/597<br>(69%)    | 443/948<br>(47%)    | 321/563<br>(57.0%)  | 254/572<br>(44.4%)  | 279/524<br>(53.2%)  | 380/985<br>(39%)    | 217/347<br>(62.5%)  | 458/652<br>(70.2%)  |
| G3-5 AE (Control) | 399/1228<br>(32%)   | 309/602<br>(51%)    | 315/960<br>(33%)    | 241/558<br>(43.2%)  | 172/574<br>(30.0%)  | 237/527<br>(45.0%)  | 398/1050<br>(38%)   | 181/350<br>(51.7%)  | 439/650<br>(67.5%)  |
| OR                | 2.28<br>(1.86-2.81) | 2.10<br>(1.66-2.65) | 1.80<br>(1.49-2.16) | 1.74<br>(1.38-2.21) | 1.87<br>(1.46-2.38) | 1.39<br>(1.09-1.78) | 1.03<br>(0.86-1.23) | 1.56<br>(1.15-2.11) | 1.13<br>(0.90-1.44) |
|                   |                     | 1.86(1.61-2.14)     |                     | 1.79(1.51-2.11)     |                     |                     |                     |                     |                     |

AE: adverse event; Exp.: experimental group; OR: odds ratio.

Supplementary Material 12: Assessment of the certainty of evidence using the confidence in network meta-analysis (CINeMA)

1. Efficacy-OS for all population

1.1 network plot drawn by CINeMA

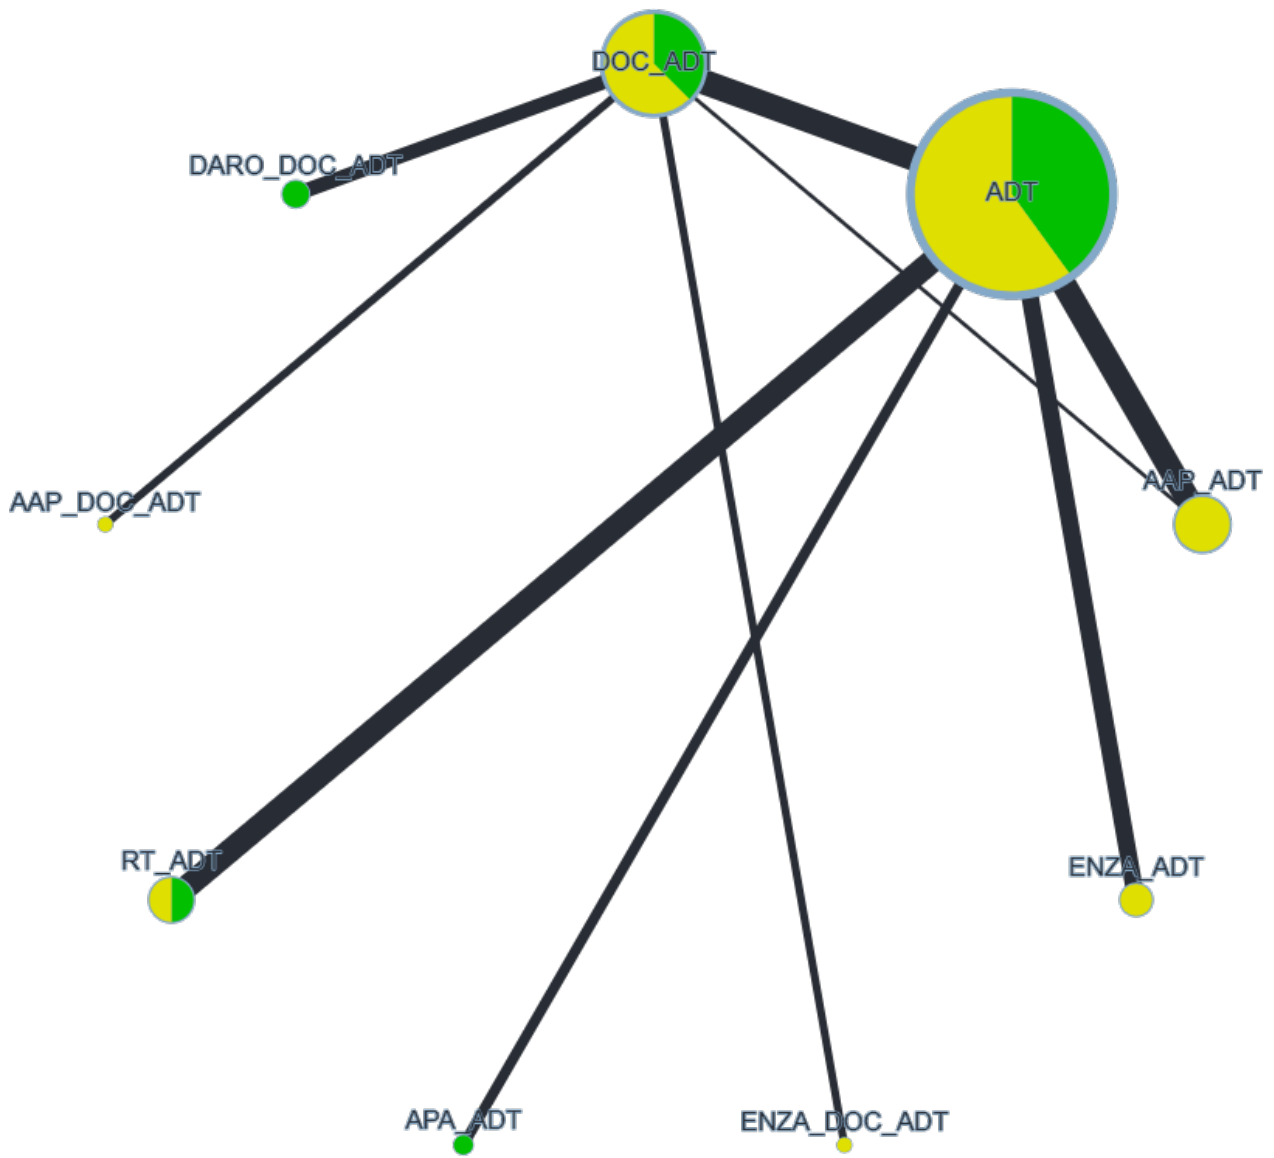

1.2 Risk of Bias Chart showing the contribution of low, moderate or high RoB comparisons to each network estimate

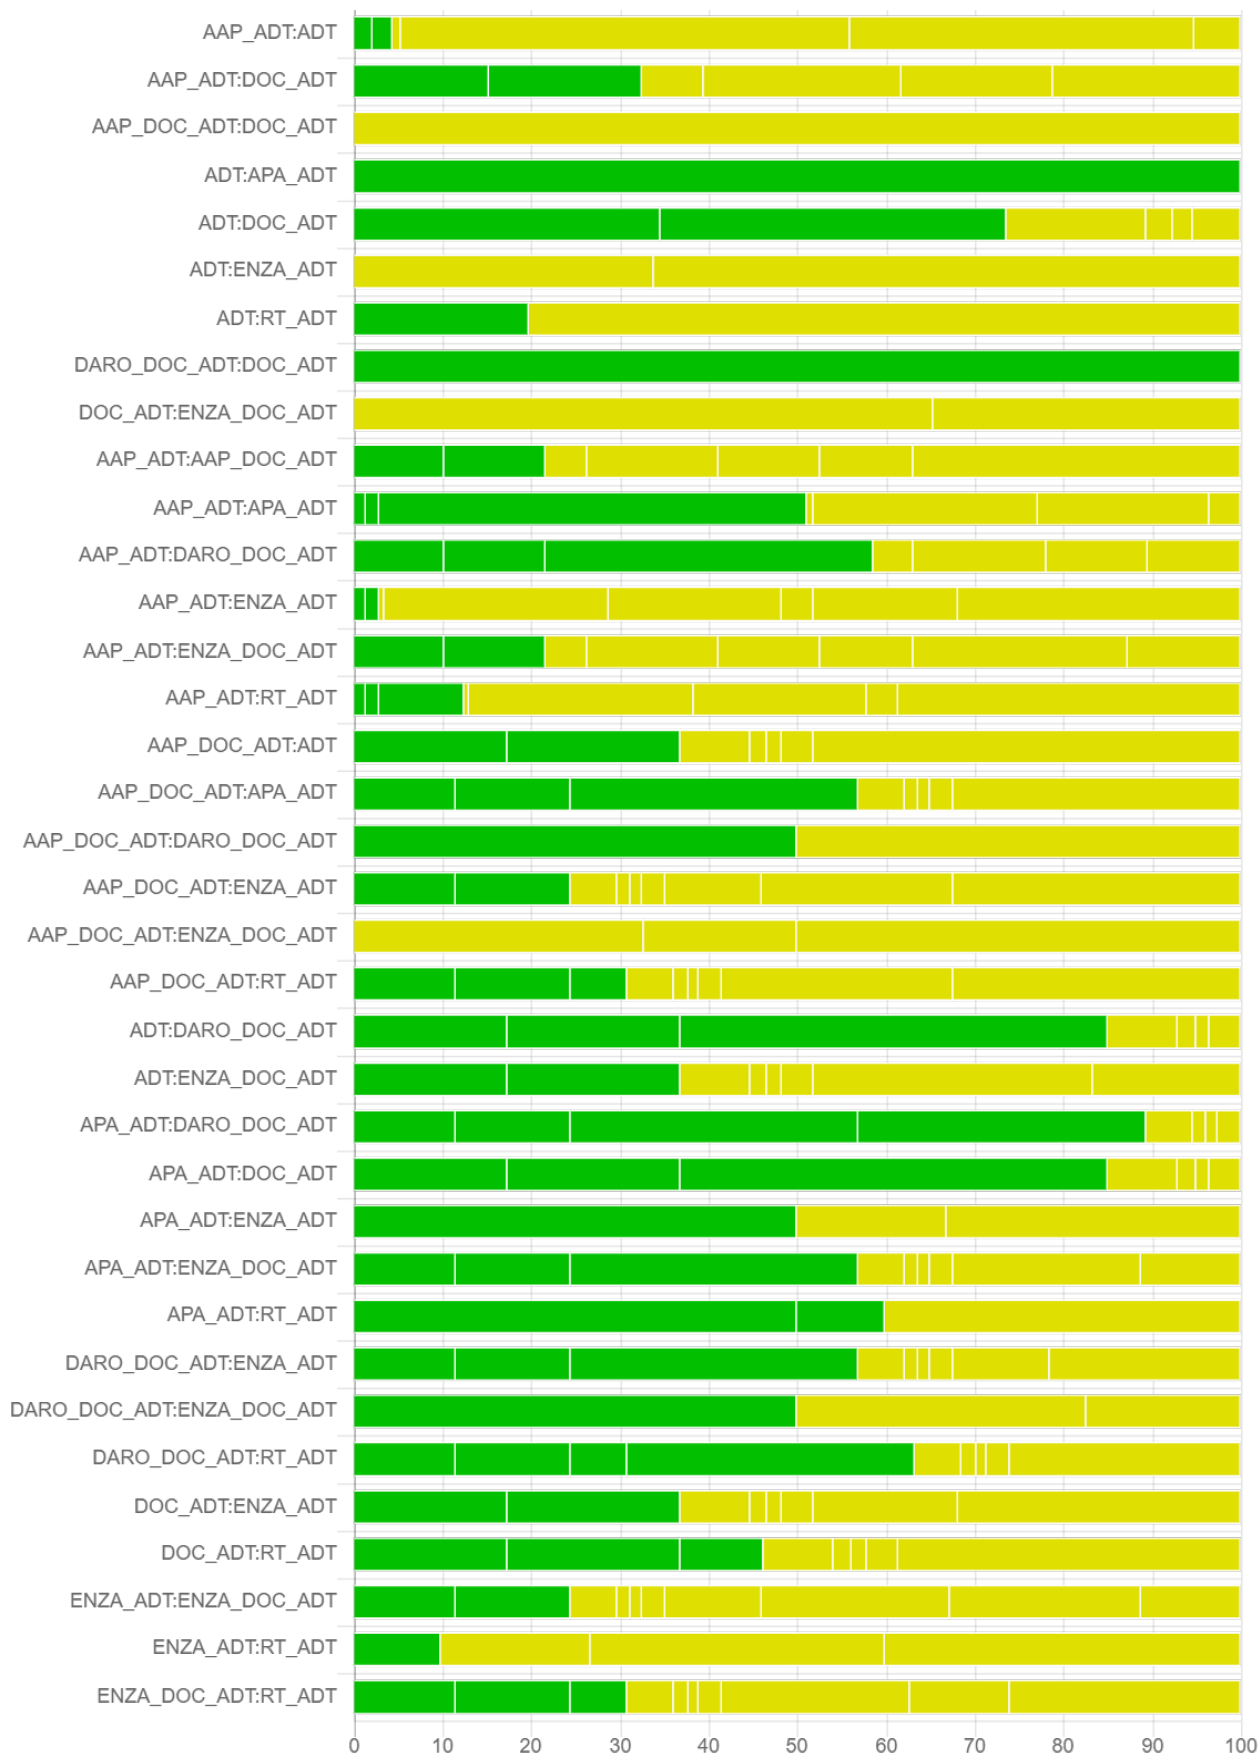

### 1.3 Evaluation of the Certainty of evidence Using CINEMA Framework, mixed evidence

| Comparison               | Number of studies | Within-study bias | Reporting bias | Indirectness | Imprecision    | Heterogeneity | Incoherence    | Confidence rating |
|--------------------------|-------------------|-------------------|----------------|--------------|----------------|---------------|----------------|-------------------|
| AAP_ADT:ADT              | 2                 | Some concerns     | Low risk       | No concerns  | No concerns    | No concerns   | Major concerns | Very low          |
| AAP_ADT:DOC_ADT          | 1                 | Some concerns     | Low risk       | No concerns  | Some concerns  | No concerns   | Major concerns | Very low          |
| AAP_DOC_ADT:DOC_ADT      | 1                 | Some concerns     | Low risk       | No concerns  | No concerns    | Some concerns | Some concerns  | Very low          |
| ADT:APA_ADT              | 1                 | No concerns       | Low risk       | No concerns  | No concerns    | No concerns   | Some concerns  | Moderate          |
| ADT:DOC_ADT              | 3                 | No concerns       | Low risk       | No concerns  | No concerns    | No concerns   | Some concerns  | Moderate          |
| ADT:ENZA_ADT             | 2                 | Some concerns     | Low risk       | No concerns  | No concerns    | No concerns   | Some concerns  | Low               |
| ADT:RT_ADT               | 2                 | Some concerns     | Low risk       | No concerns  | Some concerns  | No concerns   | Some concerns  | Low               |
| DARO_DOC_ADT:DOC_ADT     | 1                 | No concerns       | Low risk       | No concerns  | No concerns    | No concerns   | Some concerns  | Moderate          |
| DOC_ADT:ENZA_DOC_ADT     | 2                 | Some concerns     | Low risk       | No concerns  | Some concerns  | Some concerns | Some concerns  | Very low          |
| AAP_ADT:AAP_DOC_ADT      | 0                 | Some concerns     | Low risk       | No concerns  | Some concerns  | Some concerns | Some concerns  | Very low          |
| AAP_ADT:APA_ADT          | 0                 | No concerns       | Low risk       | No concerns  | Some concerns  | Some concerns | Some concerns  | Very low          |
| AAP_ADT:DARO_DOC_ADT     | 0                 | No concerns       | Low risk       | No concerns  | No concerns    | Some concerns | Some concerns  | Low               |
| AAP_ADT:ENZA_ADT         | 0                 | Some concerns     | Low risk       | No concerns  | Major concerns | No concerns   | Some concerns  | Very low          |
| AAP_ADT:ENZA_DOC_ADT     | 0                 | Some concerns     | Low risk       | No concerns  | Major concerns | No concerns   | Some concerns  | Very low          |
| AAP_ADT:RT_ADT           | 0                 | Some concerns     | Low risk       | No concerns  | No concerns    | No concerns   | Some concerns  | Low               |
| AAP_DOC_ADT:ADT          | 0                 | Some concerns     | Low risk       | No concerns  | No concerns    | No concerns   | Some concerns  | Low               |
| AAP_DOC_ADT:APA_ADT      | 0                 | No concerns       | Low risk       | No concerns  | Major concerns | No concerns   | Some concerns  | High              |
| AAP_DOC_ADT:DARO_DOC_ADT | 0                 | Some concerns     | Low risk       | No concerns  | Major concerns | No concerns   | Some concerns  | Very low          |
| AAP_DOC_ADT:ENZA_ADT     | 0                 | Some concerns     | Low risk       | No concerns  | Major concerns | No concerns   | Some concerns  | Very low          |
| AAP_DOC_ADT:ENZA_DOC_ADT | 0                 | Some concerns     | Low risk       | No concerns  | Major concerns | No concerns   | Some concerns  | Very low          |
| AAP_DOC_ADT:RT_ADT       | 0                 | Some concerns     | Low risk       | No concerns  | No concerns    | No concerns   | Some concerns  | Low               |
| ADT:DARO_DOC_ADT         | 0                 | No concerns       | Low risk       | No concerns  | No concerns    | No concerns   | Some concerns  | Moderate          |
| ADT:ENZA_DOC_ADT         | 0                 | Some concerns     | Low risk       | No concerns  | No concerns    | No concerns   | Some concerns  | Low               |
| APA_ADT:DARO_DOC_ADT     | 0                 | No concerns       | Low risk       | No concerns  | Some concerns  | Some concerns | Some concerns  | Very low          |
| APA_ADT:DOC_ADT          | 0                 | No concerns       | Low risk       | No concerns  | Some concerns  | No concerns   | Some concerns  | Low               |
| APA_ADT:ENZA_ADT         | 0                 | Some concerns     | Low risk       | No concerns  | Major concerns | No concerns   | Some concerns  | Very low          |

|                           |   |               |          |             |                |             |               |          |
|---------------------------|---|---------------|----------|-------------|----------------|-------------|---------------|----------|
| APA_ADT:ENZA_DOC_ADT      | 0 | No concerns   | Low risk | No concerns | Major concerns | No concerns | Some concerns | Very low |
| APA_ADT:RT_ADT            | 0 | No concerns   | Low risk | No concerns | No concerns    | No concerns | Some concerns | Moderate |
| DARO_DOC_ADT:ENZA_ADT     | 0 | No concerns   | Low risk | No concerns | Some concerns  | No concerns | Some concerns | Low      |
| DARO_DOC_ADT:ENZA_DOC_ADT | 0 | Some concerns | Low risk | No concerns | Some concerns  | No concerns | Some concerns | Very low |
| DARO_DOC_ADT:RT_ADT       | 0 | No concerns   | Low risk | No concerns | No concerns    | No concerns | Some concerns | Moderate |
| DOC_ADT:ENZA_ADT          | 0 | Some concerns | Low risk | No concerns | Some concerns  | No concerns | Some concerns | Very low |
| DOC_ADT:RT_ADT            | 0 | Some concerns | Low risk | No concerns | Some concerns  | No concerns | Some concerns | Very low |
| ENZA_ADT:ENZA_DOC_ADT     | 0 | Some concerns | Low risk | No concerns | Major concerns | No concerns | Some concerns | Very low |
| ENZA_ADT:RT_ADT           | 0 | Some concerns | Low risk | No concerns | No concerns    | No concerns | Some concerns | Low      |
| ENZA_DOC_ADT:RT_ADT       | 0 | Some concerns | Low risk | No concerns | Some concerns  | No concerns | Some concerns | Very low |

2. Efficacy- generalized PFS for all population

2.1 network plot drawn by CINeMA

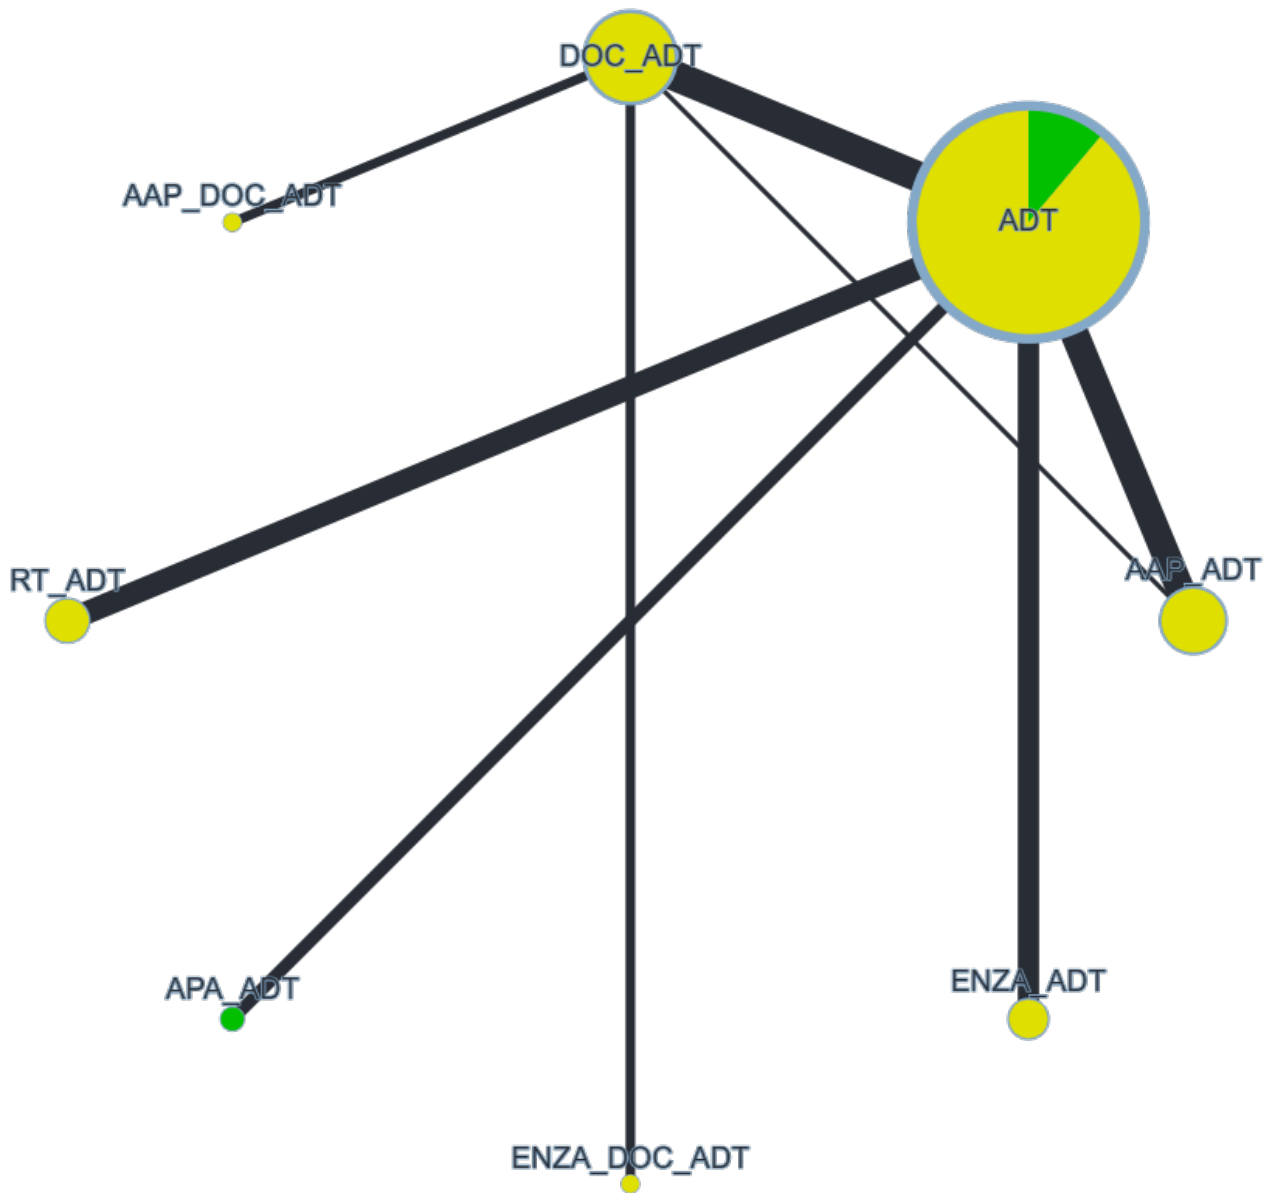

2.2 Risk of Bias Chart showing the contribution of low, moderate or high RoB comparisons to each network estimate

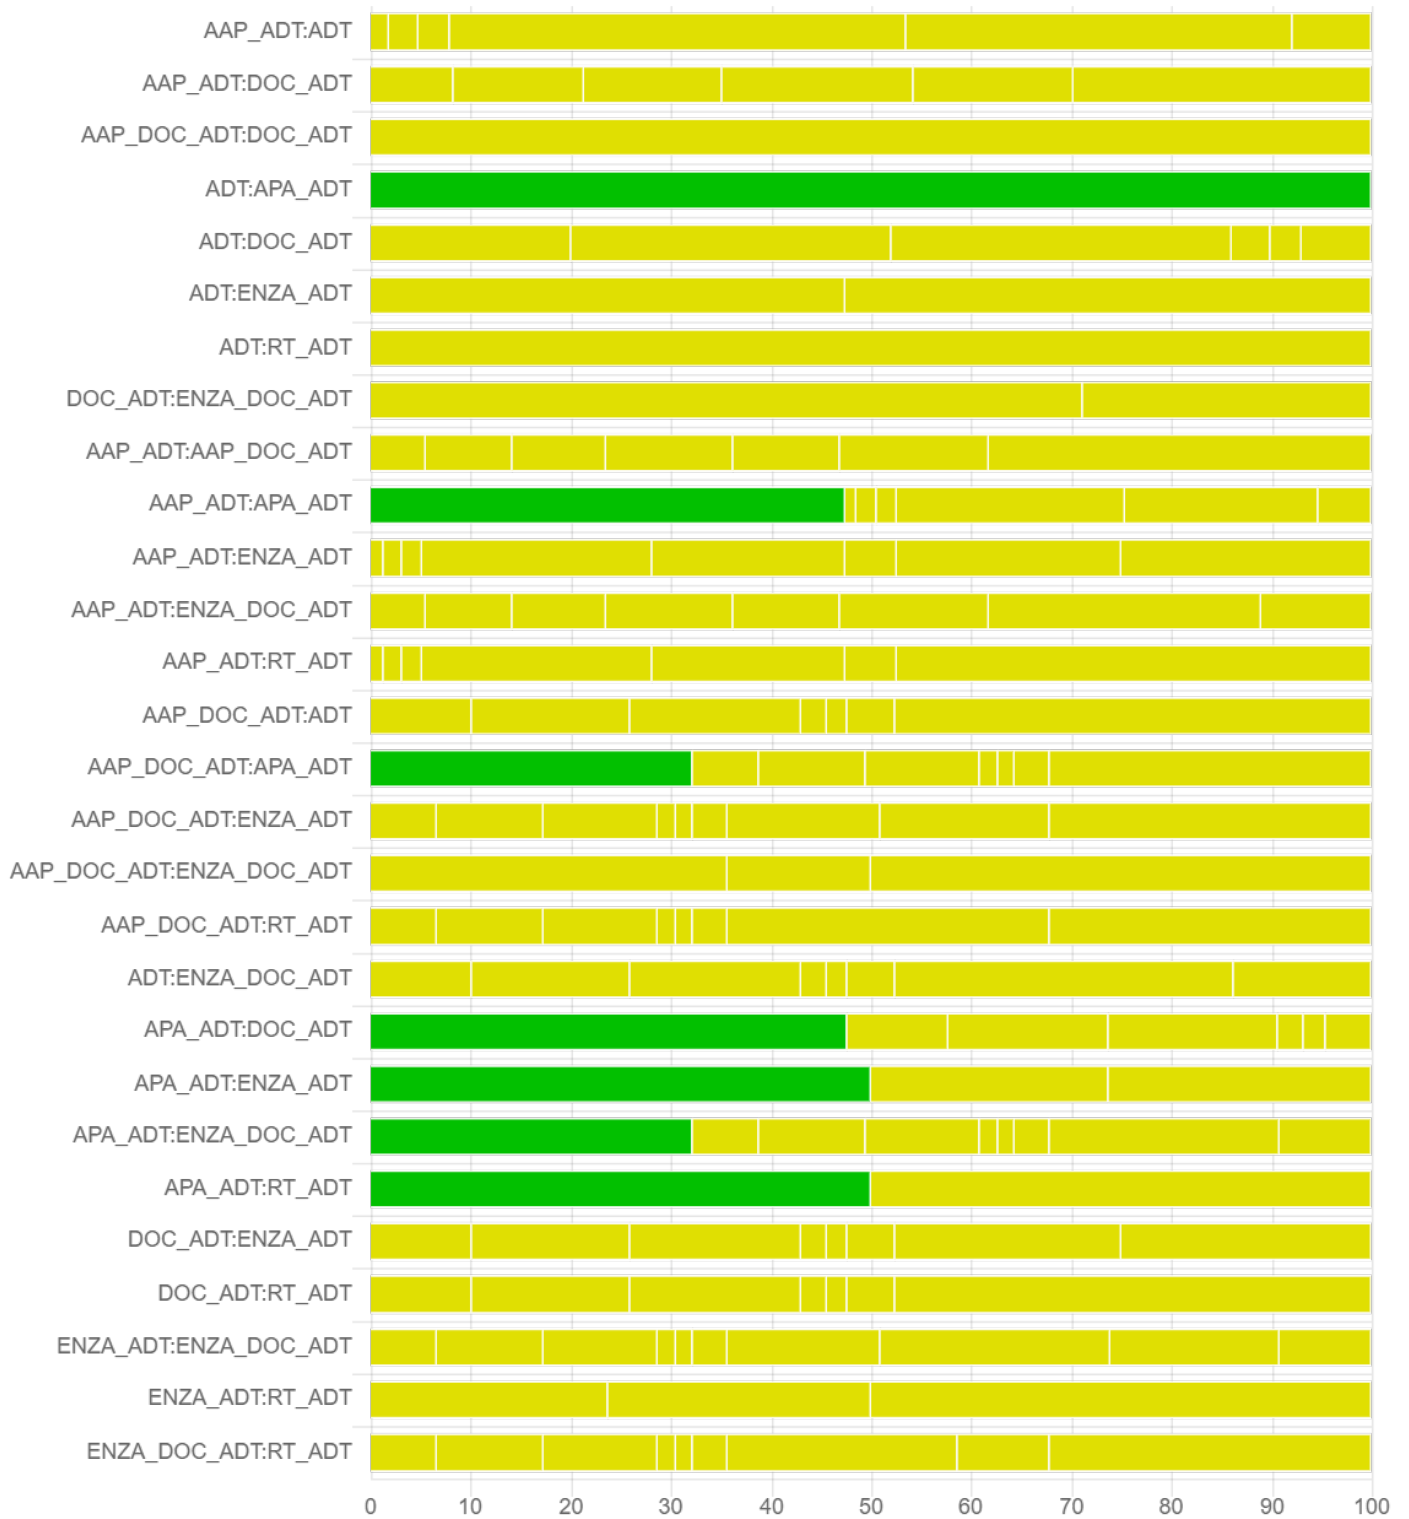



## 2.3 Evaluation of the Certainty of evidence Using CINEMA Framework, mixed evidence

| Comparison               | Number of studies | Within-study bias | Reporting bias | Indirectness | Imprecision    | Heterogeneity | Incoherence | Confidence rating |
|--------------------------|-------------------|-------------------|----------------|--------------|----------------|---------------|-------------|-------------------|
| AAP_ADT:ADT              | 2                 | Some concerns     | Low risk       | No concerns  | No concerns    | No concerns   | No concerns | Moderate          |
| AAP_ADT:DOC_ADT          | 1                 | Some concerns     | Low risk       | No concerns  | No concerns    | Some concerns | No concerns | Low               |
| AAP_DOC_ADT:DOC_ADT      | 1                 | Some concerns     | Low risk       | No concerns  | No concerns    | No concerns   | No concerns | Moderate          |
| ADT:APA_ADT              | 1                 | No concerns       | Low risk       | No concerns  | No concerns    | No concerns   | No concerns | High              |
| ADT:DOC_ADT              | 3                 | Some concerns     | Low risk       | No concerns  | No concerns    | No concerns   | No concerns | Moderate          |
| ADT:ENZA_ADT             | 2                 | Some concerns     | Low risk       | No concerns  | No concerns    | No concerns   | No concerns | Moderate          |
| ADT:RT_ADT               | 1                 | Some concerns     | Low risk       | No concerns  | Major concerns | No concerns   | No concerns | Very low          |
| DOC_ADT:ENZA_DOC_ADT     | 2                 | Some concerns     | Low risk       | No concerns  | No concerns    | No concerns   | No concerns | Moderate          |
| AAP_ADT:AAP_DOC_ADT      | 0                 | Some concerns     | Low risk       | No concerns  | No concerns    | Some concerns | No concerns | Low               |
| AAP_ADT:APA_ADT          | 0                 | Some concerns     | Low risk       | No concerns  | Major concerns | No concerns   | No concerns | Very low          |
| AAP_ADT:ENZA_ADT         | 0                 | Some concerns     | Low risk       | No concerns  | No concerns    | Some concerns | No concerns | Low               |
| AAP_ADT:ENZA_DOC_ADT     | 0                 | Some concerns     | Low risk       | No concerns  | No concerns    | Some concerns | No concerns | Low               |
| AAP_ADT:RT_ADT           | 0                 | Some concerns     | Low risk       | No concerns  | No concerns    | No concerns   | No concerns | Moderate          |
| AAP_DOC_ADT:ADT          | 0                 | Some concerns     | Low risk       | No concerns  | No concerns    | No concerns   | No concerns | Moderate          |
| AAP_DOC_ADT:APA_ADT      | 0                 | Some concerns     | Low risk       | No concerns  | Some concerns  | Some concerns | No concerns | Very low          |
| AAP_DOC_ADT:ENZA_ADT     | 0                 | Some concerns     | Low risk       | No concerns  | Major concerns | No concerns   | No concerns | Very low          |
| AAP_DOC_ADT:ENZA_DOC_ADT | 0                 | Some concerns     | Low risk       | No concerns  | Major concerns | No concerns   | No concerns | Very low          |
| AAP_DOC_ADT:RT_ADT       | 0                 | Some concerns     | Low risk       | No concerns  | No concerns    | No concerns   | No concerns | Moderate          |
| ADT:ENZA_DOC_ADT         | 0                 | Some concerns     | Low risk       | No concerns  | No concerns    | No concerns   | No concerns | Moderate          |
| APA_ADT:DOC_ADT          | 0                 | Some concerns     | Low risk       | No concerns  | Some concerns  | Some concerns | No concerns | Very low          |
| APA_ADT:ENZA_ADT         | 0                 | Some concerns     | Low risk       | No concerns  | Some concerns  | Some concerns | No concerns | Very low          |
| APA_ADT:ENZA_DOC_ADT     | 0                 | Some concerns     | Low risk       | No concerns  | Some concerns  | Some concerns | No concerns | Very low          |
| APA_ADT:RT_ADT           | 0                 | Some concerns     | Low risk       | No concerns  | No concerns    | No concerns   | No concerns | Moderate          |
| DOC_ADT:ENZA_ADT         | 0                 | Some concerns     | Low risk       | No concerns  | No concerns    | No concerns   | No concerns | Moderate          |
| DOC_ADT:RT_ADT           | 0                 | Some concerns     | Low risk       | No concerns  | No concerns    | Some concerns | No concerns | Low               |
| ENZA_ADT:ENZA_DOC_ADT    | 0                 | Some concerns     | Low risk       | No concerns  | Major concerns | No concerns   | No concerns | Very low          |
| ENZA_ADT:RT_ADT          | 0                 | Some concerns     | Low risk       | No concerns  | No concerns    | No concerns   | No concerns | Moderate          |
| ENZA_DOC_ADT:RT_ADT      | 0                 | Some concerns     | Low risk       | No concerns  | No concerns    | No concerns   | No concerns | Moderate          |

3. Efficacy-OS for HVD

3.1 network plot drawn by CINeMA

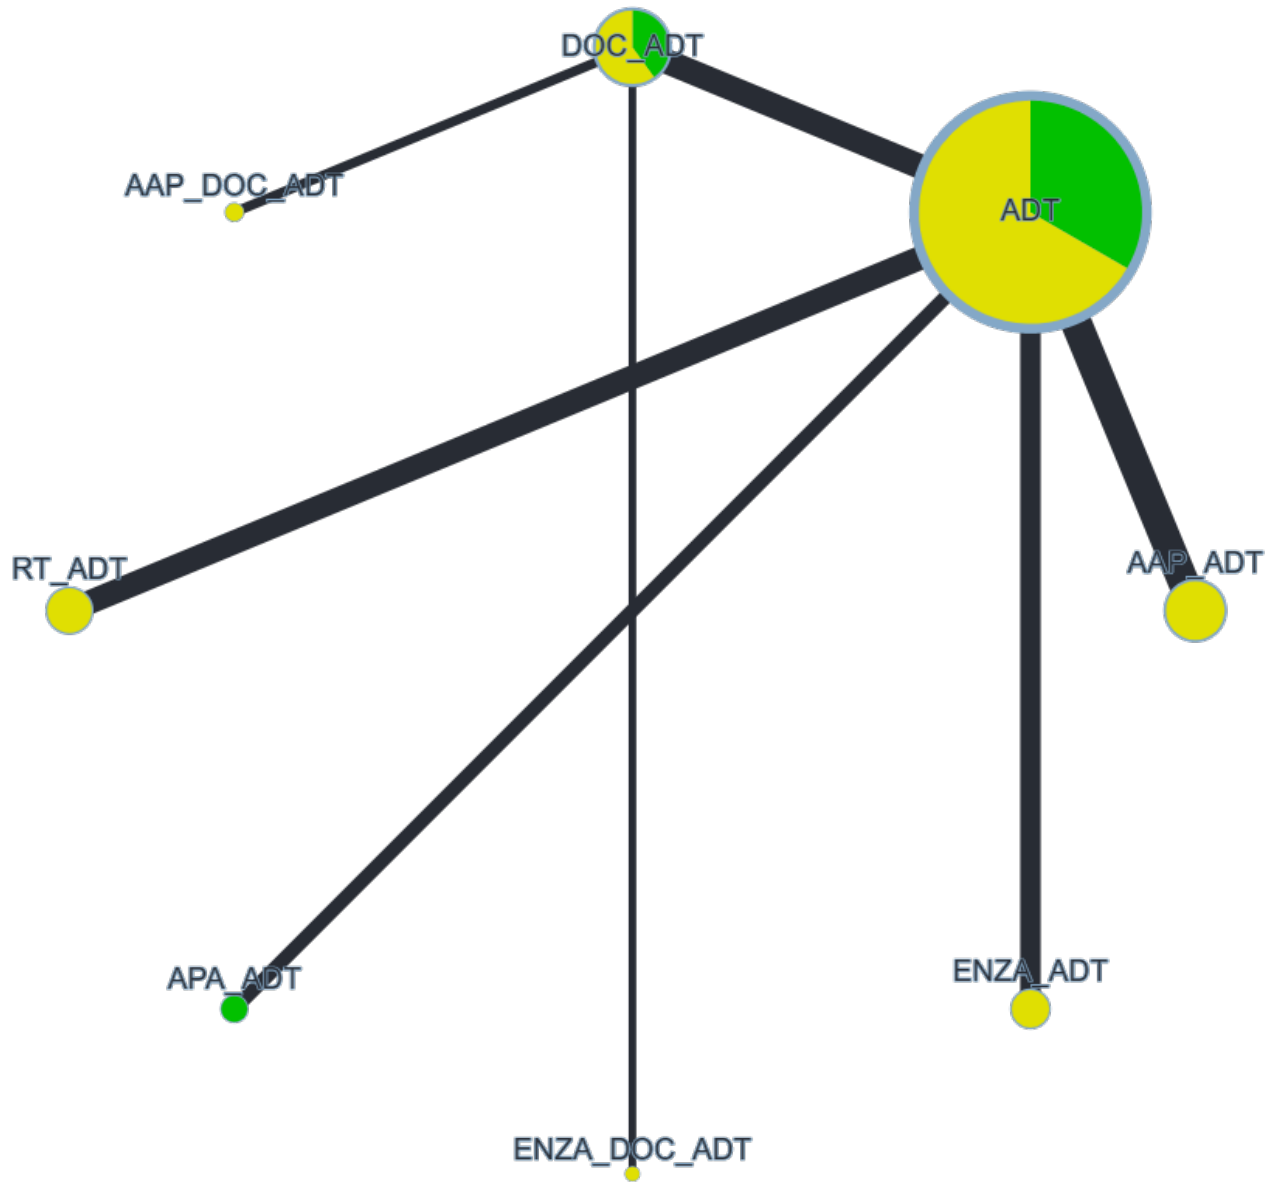

3.2 Risk of Bias Chart showing the contribution of low, moderate or high RoB comparisons to each network estimate

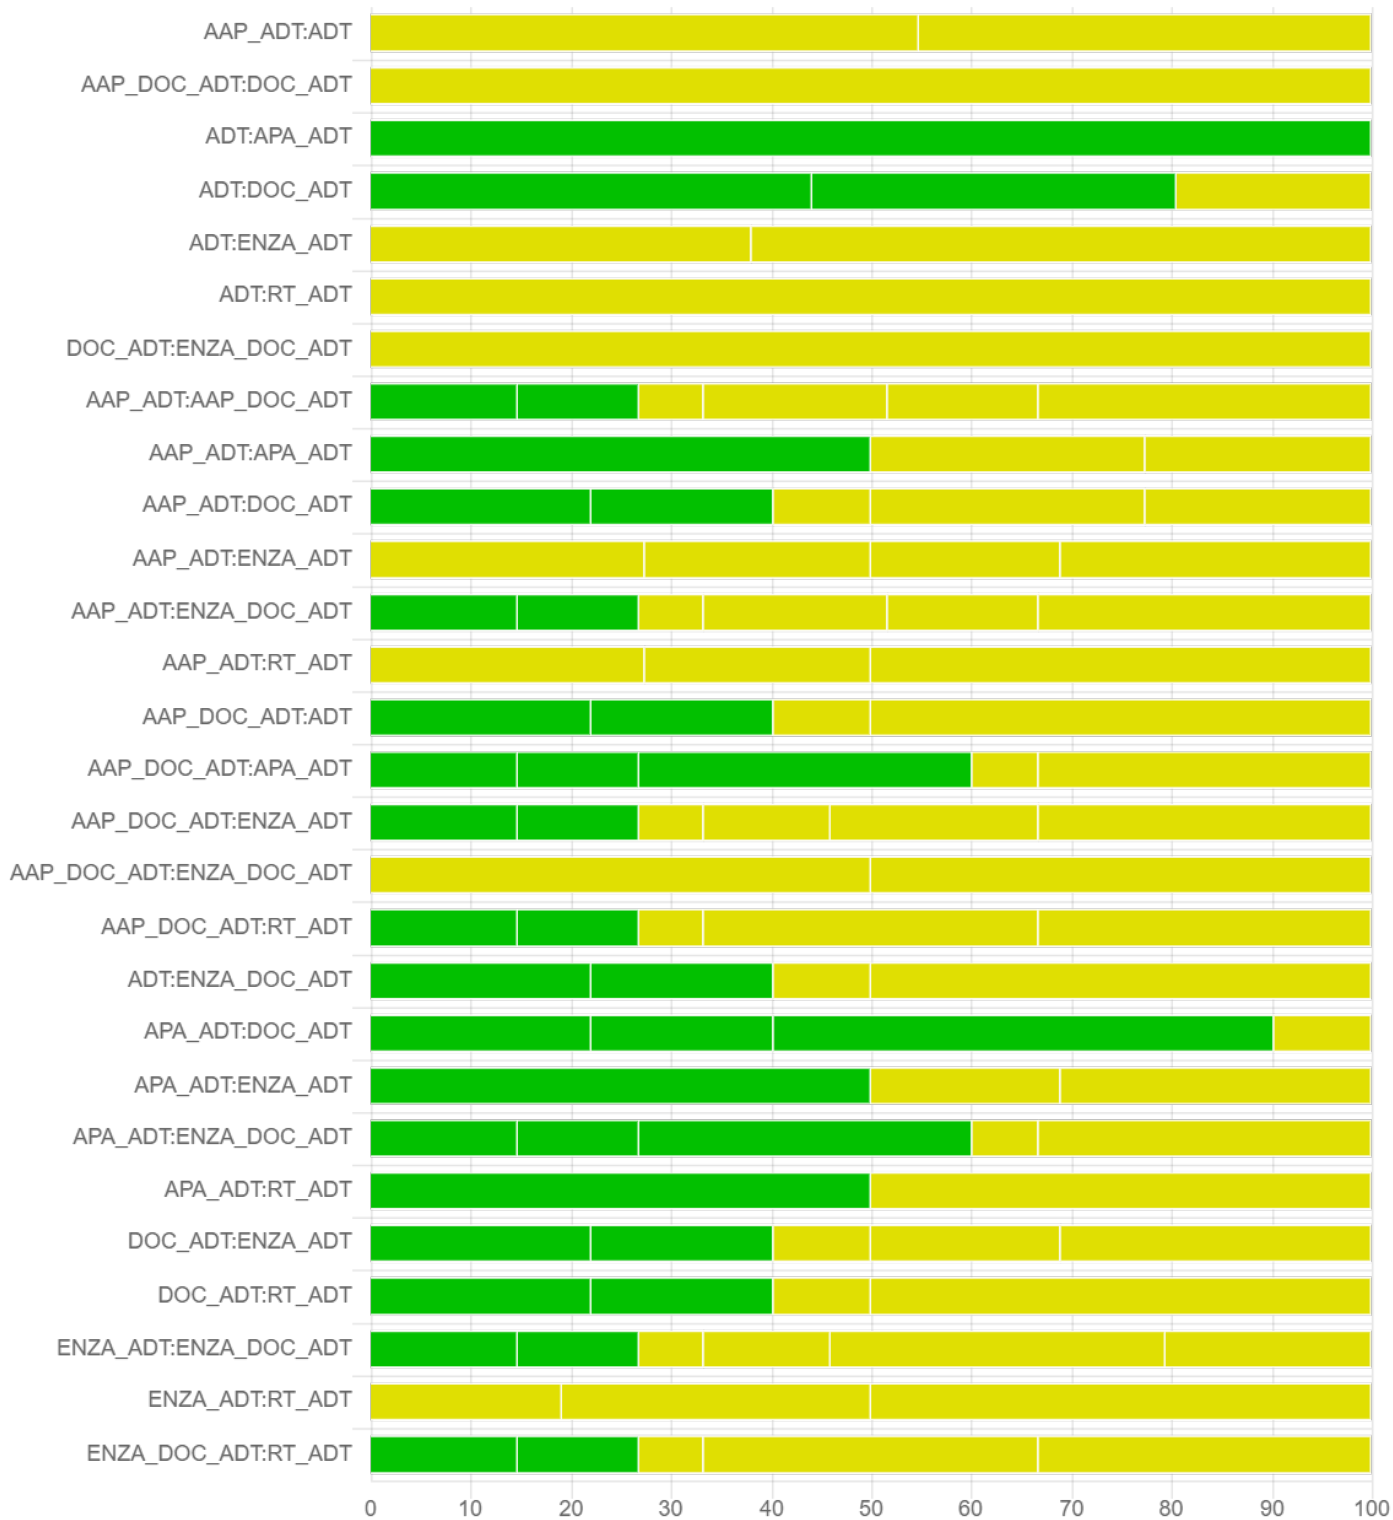

### 3.3 Evaluation of the Certainty of evidence Using CINEMA Framework, mixed evidence

| Comparison               | Number of studies | Within-study bias | Reporting bias | Indirectness | Imprecision    | Heterogeneity  | Incoherence    | Confidence rating |
|--------------------------|-------------------|-------------------|----------------|--------------|----------------|----------------|----------------|-------------------|
| AAP_ADT:ADT              | 2                 | Some concerns     | Low risk       | No concerns  | No concerns    | No concerns    | Major concerns | Very low          |
| AAP_DOC_ADT:DOC_ADT      | 1                 | Some concerns     | Low risk       | No concerns  | No concerns    | Some concerns  | Major concerns | Very low          |
| ADT:APA_ADT              | 1                 | No concerns       | Low risk       | No concerns  | No concerns    | Some concerns  | Major concerns | Very low          |
| ADT:DOC_ADT              | 3                 | No concerns       | Low risk       | No concerns  | No concerns    | No concerns    | Major concerns | Low               |
| ADT:ENZA_ADT             | 2                 | Some concerns     | Low risk       | No concerns  | No concerns    | Some concerns  | Major concerns | Very low          |
| ADT:RT_ADT               | 1                 | Some concerns     | Low risk       | No concerns  | Some concerns  | Some concerns  | Major concerns | Very low          |
| DOC_ADT:ENZA_DOC_ADT     | 1                 | Some concerns     | Low risk       | No concerns  | Major concerns | No concerns    | Major concerns | Very low          |
| AAP_ADT:AAP_DOC_ADT      | 0                 | Some concerns     | Low risk       | No concerns  | Some concerns  | Some concerns  | Major concerns | Very low          |
| AAP_ADT:APA_ADT          | 0                 | Some concerns     | Low risk       | No concerns  | Major concerns | No concerns    | Major concerns | Very low          |
| AAP_ADT:DOC_ADT          | 0                 | Some concerns     | Low risk       | No concerns  | Major concerns | No concerns    | Major concerns | Very low          |
| AAP_ADT:ENZA_ADT         | 0                 | Some concerns     | Low risk       | No concerns  | Some concerns  | Some concerns  | Major concerns | Very low          |
| AAP_ADT:ENZA_DOC_ADT     | 0                 | Some concerns     | Low risk       | No concerns  | Major concerns | No concerns    | Major concerns | Very low          |
| AAP_ADT:RT_ADT           | 0                 | Some concerns     | Low risk       | No concerns  | No concerns    | No concerns    | Major concerns | Very low          |
| AAP_DOC_ADT:ADT          | 0                 | Some concerns     | Low risk       | No concerns  | No concerns    | No concerns    | Major concerns | Very low          |
| AAP_DOC_ADT:APA_ADT      | 0                 | No concerns       | Low risk       | No concerns  | Some concerns  | Some concerns  | Major concerns | Very low          |
| AAP_DOC_ADT:ENZA_ADT     | 0                 | Some concerns     | Low risk       | No concerns  | No concerns    | Major concerns | Major concerns | Very low          |
| AAP_DOC_ADT:ENZA_DOC_ADT | 0                 | Some concerns     | Low risk       | No concerns  | Some concerns  | Some concerns  | Major concerns | Very low          |
| AAP_DOC_ADT:RT_ADT       | 0                 | Some concerns     | Low risk       | No concerns  | No concerns    | No concerns    | Major concerns | Very low          |
| ADT:ENZA_DOC_ADT         | 0                 | Some concerns     | Low risk       | No concerns  | Some concerns  | Some concerns  | Major concerns | Very low          |
| APA_ADT:DOC_ADT          | 0                 | No concerns       | Low risk       | No concerns  | Major concerns | No concerns    | Major concerns | Very low          |
| APA_ADT:ENZA_ADT         | 0                 | Some concerns     | Low risk       | No concerns  | Major concerns | No concerns    | Major concerns | Very low          |
| APA_ADT:ENZA_DOC_ADT     | 0                 | No concerns       | Low risk       | No concerns  | Major concerns | No concerns    | Major concerns | Very low          |
| APA_ADT:RT_ADT           | 0                 | Some concerns     | Low risk       | No concerns  | No concerns    | Some concerns  | Major concerns | Very low          |
| DOC_ADT:ENZA_ADT         | 0                 | Some concerns     | Low risk       | No concerns  | Major concerns | No concerns    | Major concerns | Very low          |
| DOC_ADT:RT_ADT           | 0                 | Some concerns     | Low risk       | No concerns  | No concerns    | No concerns    | Major concerns | Very low          |
| ENZA_ADT:ENZA_DOC_ADT    | 0                 | Some concerns     | Low risk       | No concerns  | Major concerns | No concerns    | Major concerns | Very low          |
| ENZA_ADT:RT_ADT          | 0                 | Some concerns     | Low risk       | No concerns  | No concerns    | Some concerns  | Major concerns | Very low          |
| ENZA_DOC_ADT:RT_ADT      | 0                 | Some concerns     | Low risk       | No concerns  | Some concerns  | Some concerns  | Major concerns | Very low          |

#### 4. Efficacy-OS for LVD

##### 4.1 network plot drawn by CINeMA

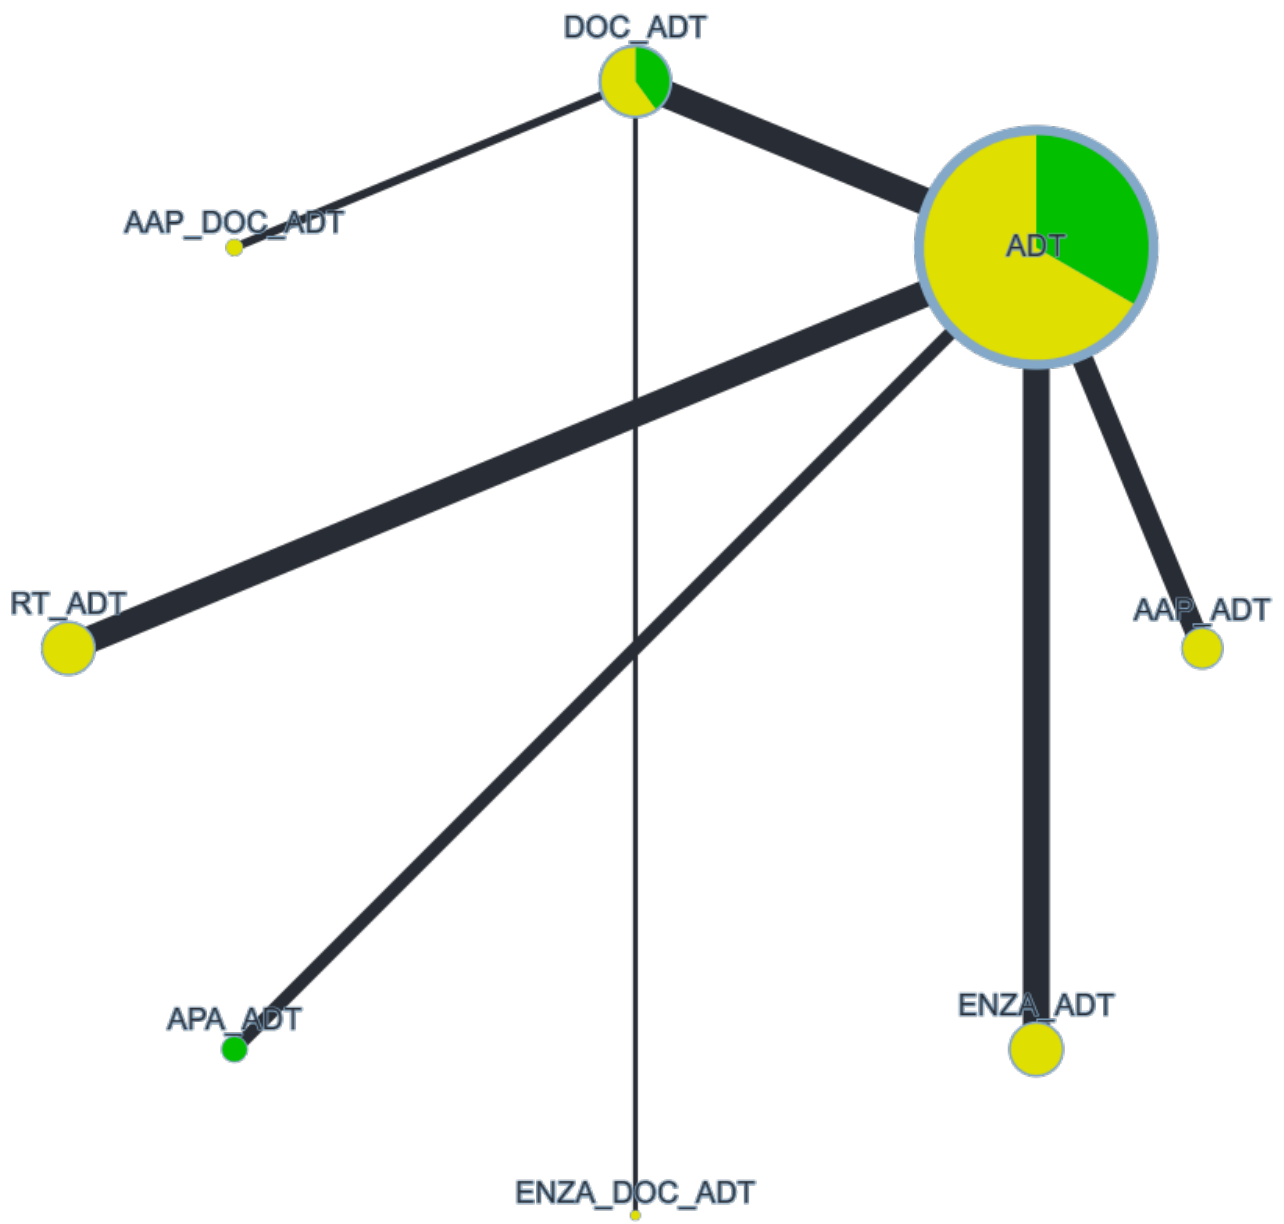

4.2 Risk of Bias Chart showing the contribution of low, moderate or high RoB comparisons to each network estimate

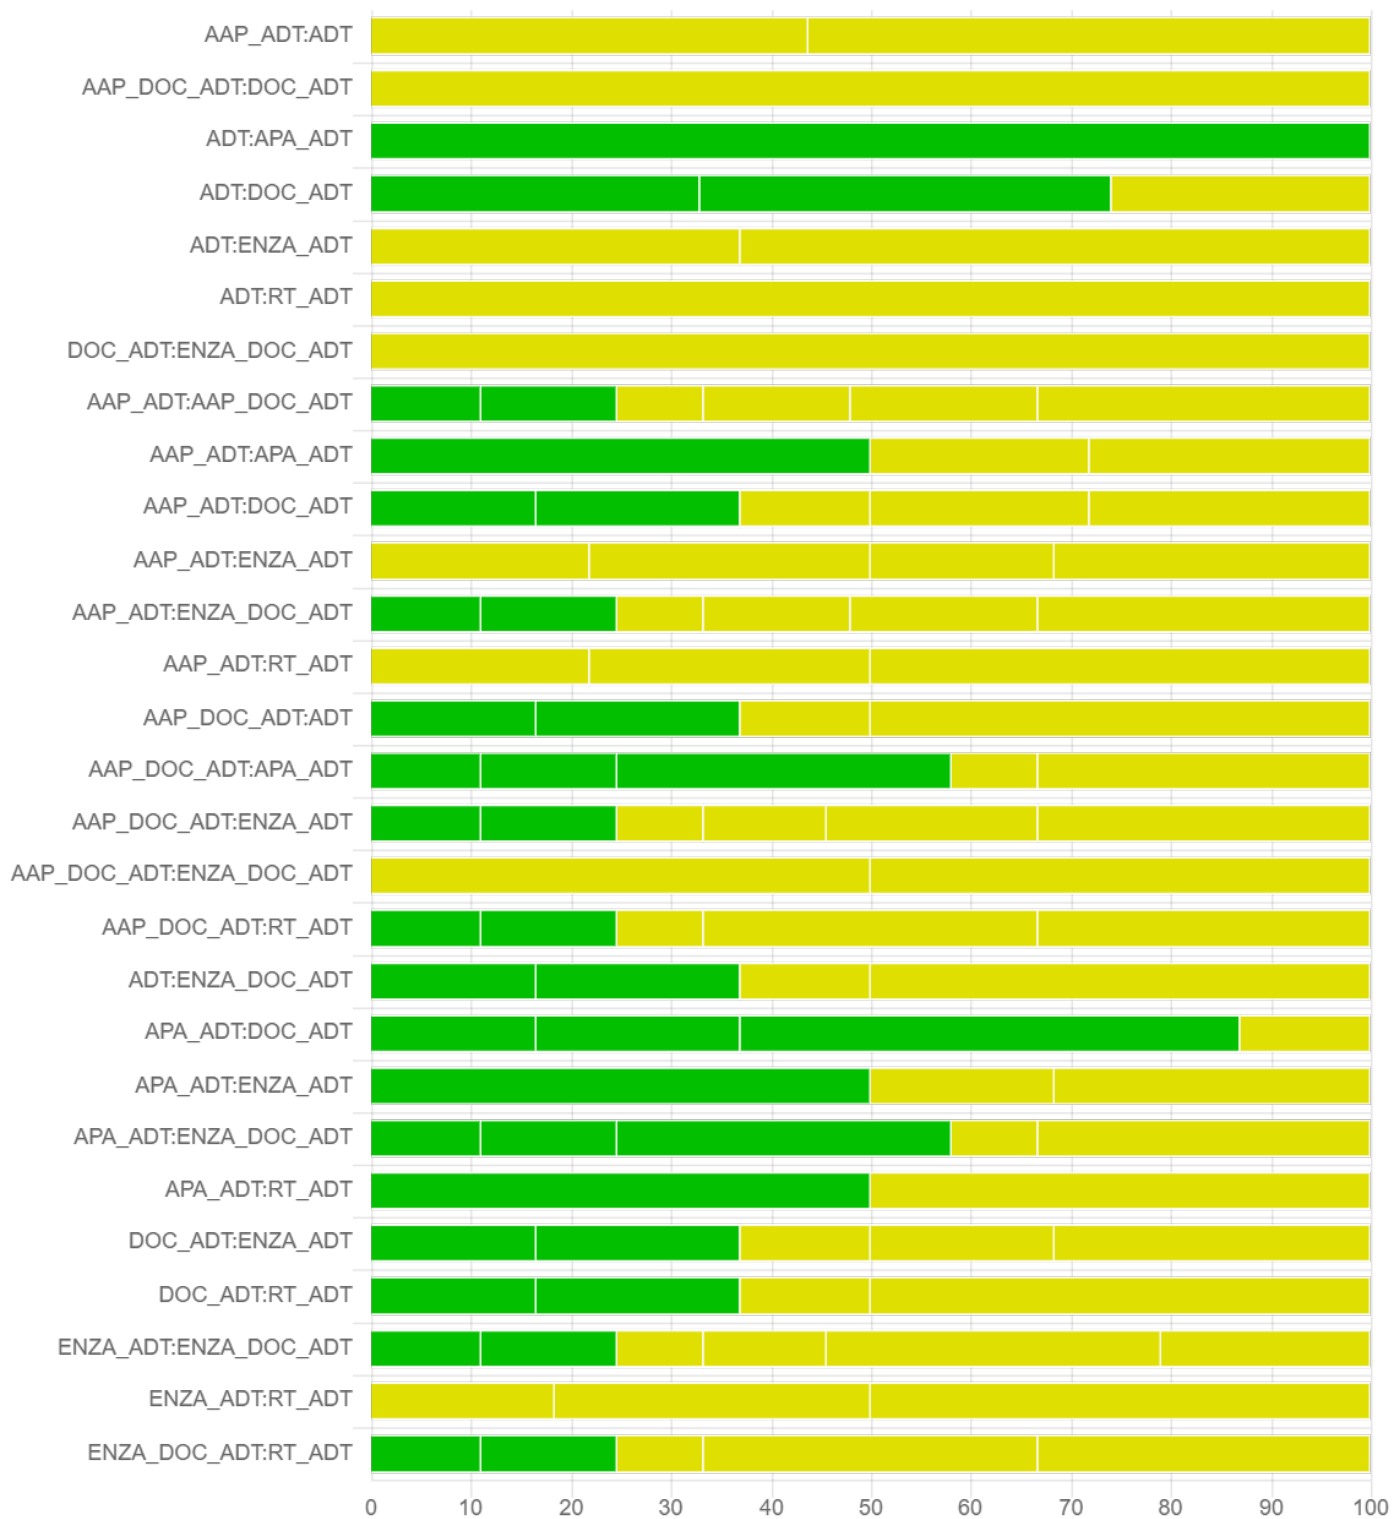

### 4.3 Evaluation of the Certainty of evidence Using CINEMA Framework, mixed evidence

| Comparison               | Number of studies | Within-study bias | Reporting bias | Indirectness | Imprecision    | Heterogeneity | Incoherence    | Confidence rating |
|--------------------------|-------------------|-------------------|----------------|--------------|----------------|---------------|----------------|-------------------|
| AAP_ADT:ADT              | 2                 | Some concerns     | Low risk       | No concerns  | No concerns    | Some concerns | Major concerns | Very low          |
| AAP_DOC_ADT:DOC_ADT      | 1                 | Some concerns     | Low risk       | No concerns  | Major concerns | No concerns   | Major concerns | Very low          |
| ADT:APA_ADT              | 1                 | No concerns       | Low risk       | No concerns  | Some concerns  | Some concerns | Major concerns | Very low          |
| ADT:DOC_ADT              | 3                 | No concerns       | Low risk       | No concerns  | Some concerns  | Some concerns | Major concerns | Very low          |
| ADT:ENZA_ADT             | 2                 | Some concerns     | Low risk       | No concerns  | No concerns    | No concerns   | Major concerns | Very low          |
| ADT:RT_ADT               | 1                 | Some concerns     | Low risk       | No concerns  | No concerns    | Some concerns | Major concerns | Very low          |
| DOC_ADT:ENZA_DOC_ADT     | 1                 | Some concerns     | Low risk       | No concerns  | Major concerns | No concerns   | Major concerns | Very low          |
| AAP_ADT:AAP_DOC_ADT      | 0                 | Some concerns     | Low risk       | No concerns  | Major concerns | No concerns   | Major concerns | Very low          |
| AAP_ADT:APA_ADT          | 0                 | Some concerns     | Low risk       | No concerns  | Major concerns | No concerns   | Major concerns | Very low          |
| AAP_ADT:DOC_ADT          | 0                 | Some concerns     | Low risk       | No concerns  | Some concerns  | Some concerns | Major concerns | Very low          |
| AAP_ADT:ENZA_ADT         | 0                 | Some concerns     | Low risk       | No concerns  | Major concerns | No concerns   | Major concerns | Very low          |
| AAP_ADT:ENZA_DOC_ADT     | 0                 | Some concerns     | Low risk       | No concerns  | Major concerns | No concerns   | Major concerns | Very low          |
| AAP_ADT:RT_ADT           | 0                 | Some concerns     | Low risk       | No concerns  | Major concerns | No concerns   | Major concerns | Very low          |
| AAP_DOC_ADT:ADT          | 0                 | Some concerns     | Low risk       | No concerns  | Major concerns | No concerns   | Major concerns | Very low          |
| AAP_DOC_ADT:APA_ADT      | 0                 | No concerns       | Low risk       | No concerns  | Major concerns | No concerns   | Major concerns | Very low          |
| AAP_DOC_ADT:ENZA_ADT     | 0                 | Some concerns     | Low risk       | No concerns  | Major concerns | No concerns   | Major concerns | Very low          |
| AAP_DOC_ADT:ENZA_DOC_ADT | 0                 | Some concerns     | Low risk       | No concerns  | Major concerns | No concerns   | Major concerns | Very low          |
| AAP_DOC_ADT:RT_ADT       | 0                 | Some concerns     | Low risk       | No concerns  | Major concerns | No concerns   | Major concerns | Very low          |
| ADT:ENZA_DOC_ADT         | 0                 | Some concerns     | Low risk       | No concerns  | Major concerns | No concerns   | Major concerns | Very low          |
| APA_ADT:DOC_ADT          | 0                 | No concerns       | Low risk       | No concerns  | Major concerns | No concerns   | Major concerns | Very low          |
| APA_ADT:ENZA_ADT         | 0                 | Some concerns     | Low risk       | No concerns  | Major concerns | No concerns   | Major concerns | Very low          |
| APA_ADT:ENZA_DOC_ADT     | 0                 | No concerns       | Low risk       | No concerns  | Major concerns | No concerns   | Major concerns | Very low          |
| APA_ADT:RT_ADT           | 0                 | Some concerns     | Low risk       | No concerns  | Major concerns | No concerns   | Major concerns | Very low          |
| DOC_ADT:ENZA_ADT         | 0                 | Some concerns     | Low risk       | No concerns  | No concerns    | Some concerns | Major concerns | Very low          |
| DOC_ADT:RT_ADT           | 0                 | Some concerns     | Low risk       | No concerns  | Some concerns  | Some concerns | Major concerns | Very low          |
| ENZA_ADT:ENZA_DOC_ADT    | 0                 | Some concerns     | Low risk       | No concerns  | Major concerns | No concerns   | Major concerns | Very low          |
| ENZA_ADT:RT_ADT          | 0                 | Some concerns     | Low risk       | No concerns  | Some concerns  | Some concerns | Major concerns | Very low          |
| ENZA_DOC_ADT:RT_ADT      | 0                 | Some concerns     | Low risk       | No concerns  | Major concerns | No concerns   | Major concerns | Very low          |

5. Efficacy-OS for visceral metastasis

5.1 network plot drawn by CINeMA

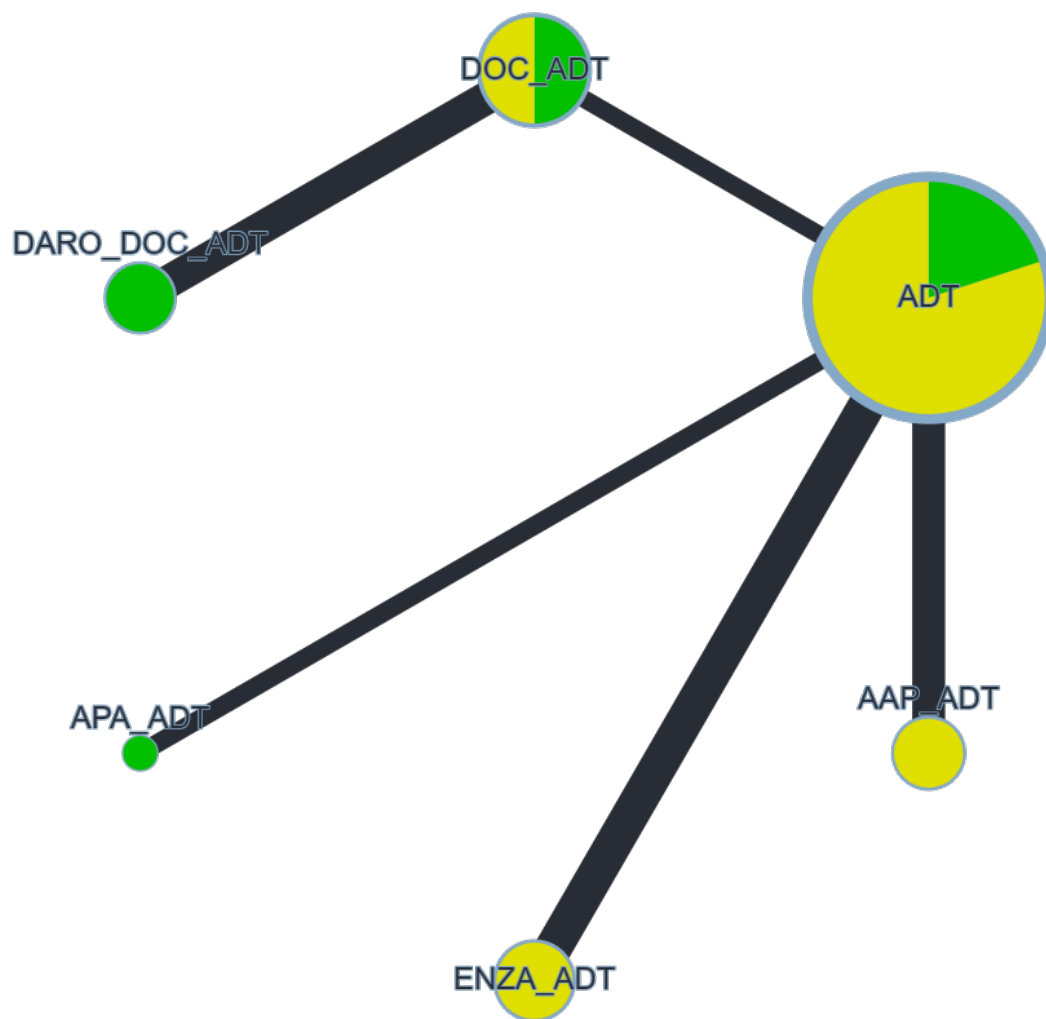



5.2 Risk of Bias Chart showing the contribution of low, moderate or high RoB comparisons to each network estimate

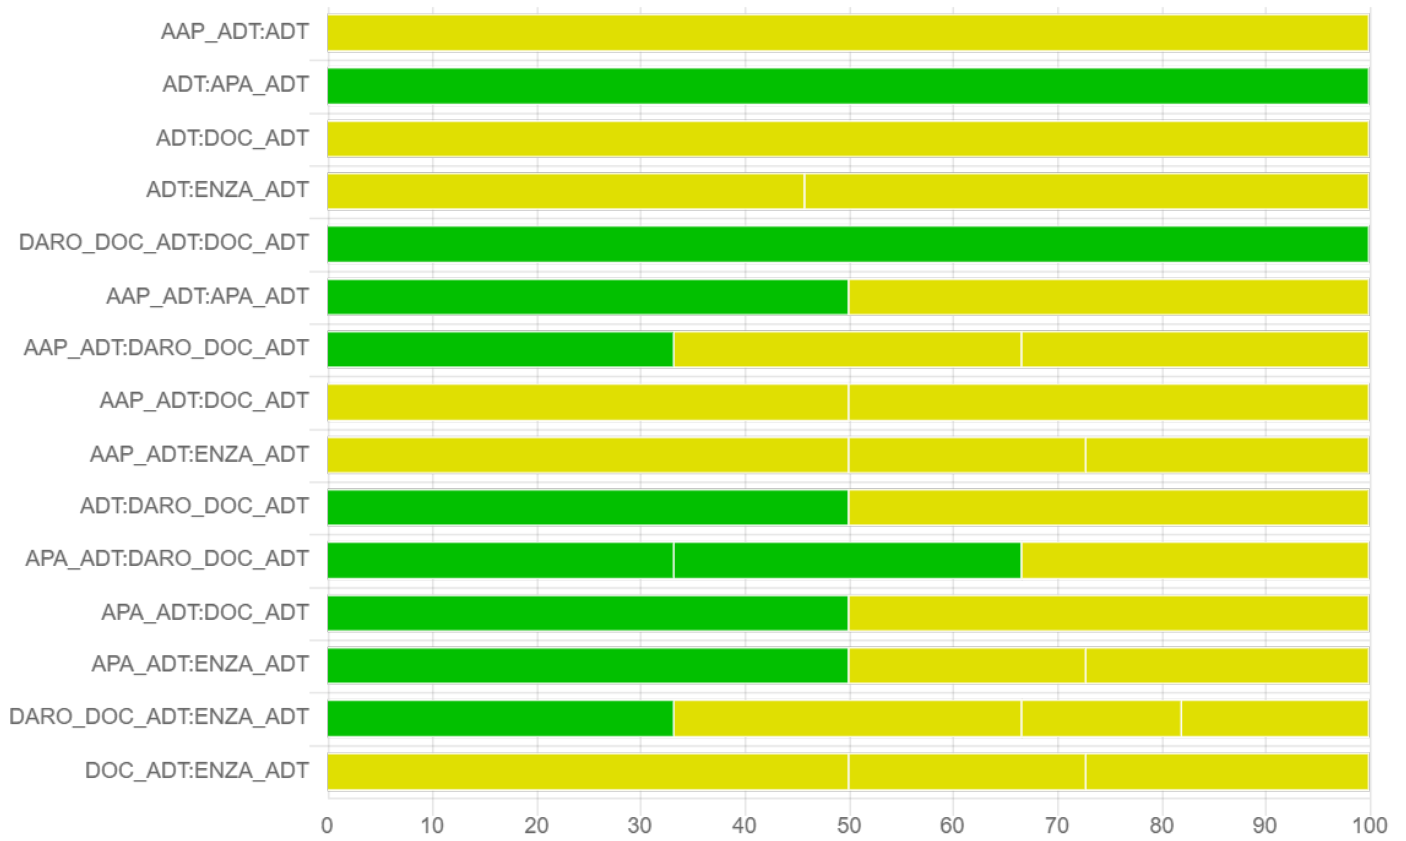

### 5.3 Evaluation of the Certainty of evidence Using CINEMA Framework, mixed evidence

| Comparison            | Number of studies | Within-study bias | Reporting bias | Indirectness | Imprecision    | Heterogeneity  | Incoherence    | Confidence rating |
|-----------------------|-------------------|-------------------|----------------|--------------|----------------|----------------|----------------|-------------------|
| AAP_ADT:ADT           | 1                 | Some concerns     | Low risk       | No concerns  | No concerns    | Major concerns | Major concerns | Very low          |
| ADT:APA_ADT           | 1                 | No concerns       | Low risk       | No concerns  | Major concerns | No concerns    | Major concerns | Very low          |
| ADT:DOC_ADT           | 1                 | Some concerns     | Low risk       | No concerns  | Some concerns  | Some concerns  | Major concerns | Very low          |
| ADT:ENZA_ADT          | 2                 | Some concerns     | Low risk       | No concerns  | Major concerns | No concerns    | Major concerns | Very low          |
| DARO_DOC_ADT:DOC_ADT  | 1                 | No concerns       | Low risk       | No concerns  | Major concerns | No concerns    | Major concerns | Very low          |
| AAP_ADT:APA_ADT       | 0                 | Some concerns     | Low risk       | No concerns  | Major concerns | No concerns    | Major concerns | Very low          |
| AAP_ADT:DARO_DOC_ADT  | 0                 | Some concerns     | Low risk       | No concerns  | Major concerns | No concerns    | Major concerns | Very low          |
| AAP_ADT:DOC_ADT       | 0                 | Some concerns     | Low risk       | No concerns  | Major concerns | No concerns    | Major concerns | Very low          |
| AAP_ADT:ENZA_ADT      | 0                 | Some concerns     | Low risk       | No concerns  | No concerns    | Major concerns | Major concerns | Very low          |
| ADT:DARO_DOC_ADT      | 0                 | Some concerns     | Low risk       | No concerns  | Some concerns  | Some concerns  | Major concerns | Very low          |
| APA_ADT:DARO_DOC_ADT  | 0                 | No concerns       | Low risk       | No concerns  | Major concerns | No concerns    | Major concerns | Very low          |
| APA_ADT:DOC_ADT       | 0                 | Some concerns     | Low risk       | No concerns  | Major concerns | No concerns    | Major concerns | Very low          |
| APA_ADT:ENZA_ADT      | 0                 | Some concerns     | Low risk       | No concerns  | Some concerns  | Some concerns  | Major concerns | Very low          |
| DARO_DOC_ADT:ENZA_ADT | 0                 | Some concerns     | Low risk       | No concerns  | No concerns    | Major concerns | Major concerns | Very low          |
| DOC_ADT:ENZA_ADT      | 0                 | Some concerns     | Low risk       | No concerns  | Some concerns  | Some concerns  | Major concerns | Very low          |

6.Safety-Grade 3-5 adverse events

6.1 network plot drawn by CINeMA

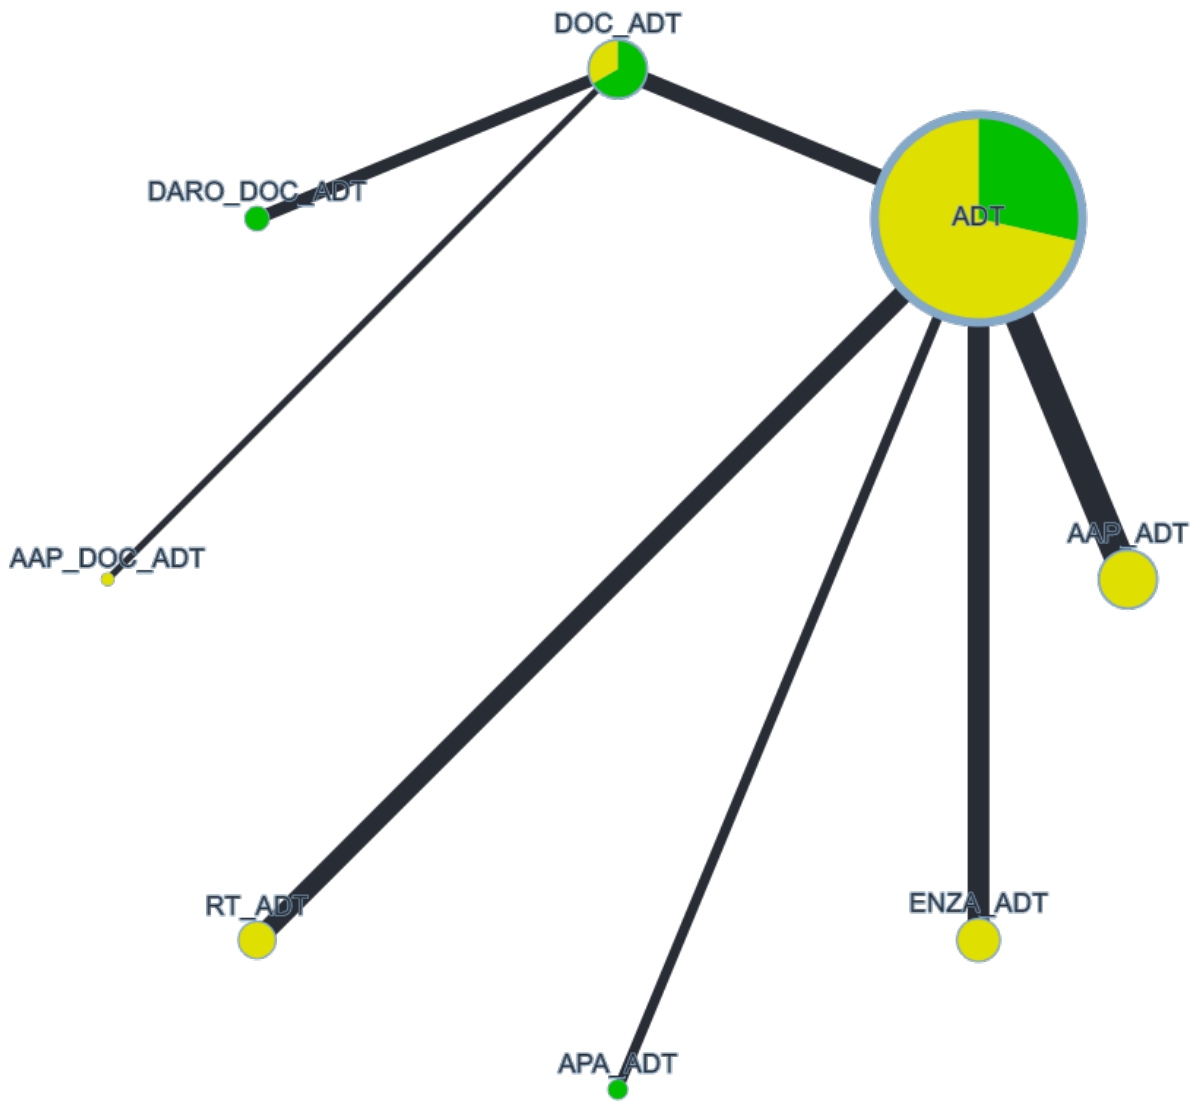

6.2 Risk of Bias Chart showing the contribution of low, moderate or high RoB comparisons to each network estimate

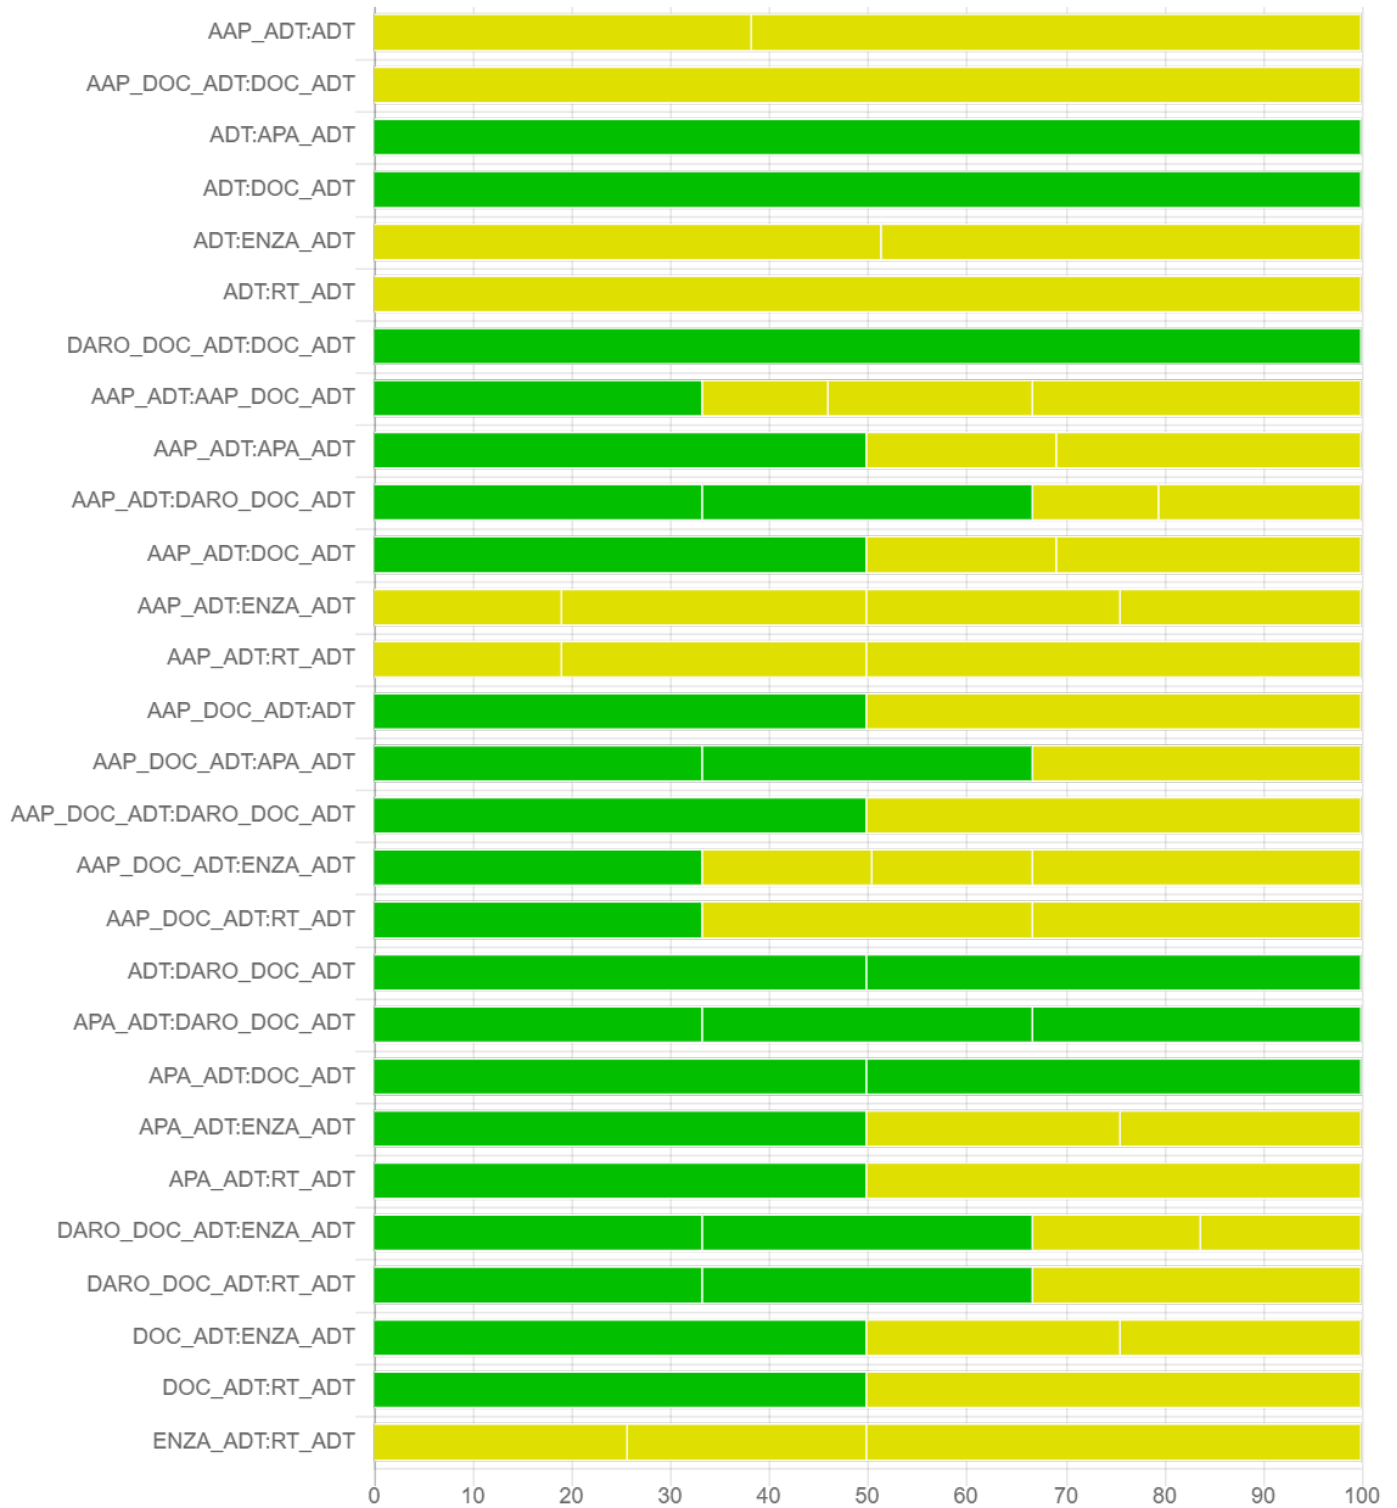

### 6.3 Evaluation of the Certainty of evidence Using CINEMA Framework, mixed evidence

| Comparison               | Number of studies | Within-study bias | Reporting bias | Indirectness | Imprecision   | Heterogeneity  | Incoherence    | Confidence rating |
|--------------------------|-------------------|-------------------|----------------|--------------|---------------|----------------|----------------|-------------------|
| AAP_ADT:ADT              | 2                 | Some concerns     | Low risk       | No concerns  | No concerns   | Major concerns | Major concerns | Very low          |
| AAP_DOC_ADT:DOC_ADT      | 1                 | Some concerns     | Low risk       | No concerns  | No concerns   | Major concerns | Major concerns | Very low          |
| ADT:APA_ADT              | 1                 | No concerns       | Low risk       | No concerns  | No concerns   | Major concerns | Major concerns | Very low          |
| ADT:DOC_ADT              | 1                 | No concerns       | Low risk       | No concerns  | No concerns   | Major concerns | Major concerns | Very low          |
| ADT:ENZA_ADT             | 2                 | Some concerns     | Low risk       | No concerns  | No concerns   | Major concerns | Major concerns | Very low          |
| ADT:RT_ADT               | 1                 | Some concerns     | Low risk       | No concerns  | No concerns   | Major concerns | Major concerns | Very low          |
| DARO_DOC_ADT:DOC_ADT     | 1                 | No concerns       | Low risk       | No concerns  | Some concerns | Some concerns  | Major concerns | Very low          |
| AAP_ADT:AAP_DOC_ADT      | 0                 | Some concerns     | Low risk       | No concerns  | No concerns   | Major concerns | Major concerns | Very low          |
| AAP_ADT:APA_ADT          | 0                 | Some concerns     | Low risk       | No concerns  | No concerns   | Major concerns | Major concerns | Very low          |
| AAP_ADT:DARO_DOC_ADT     | 0                 | No concerns       | Low risk       | No concerns  | Some concerns | Some concerns  | Major concerns | Very low          |
| AAP_ADT:DOC_ADT          | 0                 | Some concerns     | Low risk       | No concerns  | Some concerns | Some concerns  | Major concerns | Very low          |
| AAP_ADT:ENZA_ADT         | 0                 | Some concerns     | Low risk       | No concerns  | Some concerns | Some concerns  | Major concerns | Very low          |
| AAP_ADT:RT_ADT           | 0                 | Some concerns     | Low risk       | No concerns  | No concerns   | Major concerns | Major concerns | Very low          |
| AAP_DOC_ADT:ADT          | 0                 | Some concerns     | Low risk       | No concerns  | No concerns   | Major concerns | Major concerns | Very low          |
| AAP_DOC_ADT:APA_ADT      | 0                 | No concerns       | Low risk       | No concerns  | No concerns   | Major concerns | Major concerns | Very low          |
| AAP_DOC_ADT:DARO_DOC_ADT | 0                 | Some concerns     | Low risk       | No concerns  | Some concerns | Some concerns  | Major concerns | Very low          |
| AAP_DOC_ADT:ENZA_ADT     | 0                 | Some concerns     | Low risk       | No concerns  | No concerns   | Major concerns | Major concerns | Very low          |
| AAP_DOC_ADT:RT_ADT       | 0                 | Some concerns     | Low risk       | No concerns  | No concerns   | Major concerns | Major concerns | Very low          |
| ADT:DARO_DOC_ADT         | 0                 | No concerns       | Low risk       | No concerns  | No concerns   | Major concerns | Major concerns | Very low          |
| APA_ADT:DARO_DOC_ADT     | 0                 | No concerns       | Low risk       | No concerns  | No concerns   | Major concerns | Major concerns | Very low          |
| APA_ADT:DOC_ADT          | 0                 | No concerns       | Low risk       | No concerns  | No concerns   | Major concerns | Major concerns | Very low          |
| APA_ADT:ENZA_ADT         | 0                 | Some concerns     | Low risk       | No concerns  | Some concerns | Some concerns  | Major concerns | Very low          |
| APA_ADT:RT_ADT           | 0                 | Some concerns     | Low risk       | No concerns  | No concerns   | Major concerns | Major concerns | Very low          |
| DARO_DOC_ADT:ENZA_ADT    | 0                 | No concerns       | Low risk       | No concerns  | No concerns   | Major concerns | Major concerns | Very low          |
| DARO_DOC_ADT:RT_ADT      | 0                 | No concerns       | Low risk       | No concerns  | No concerns   | Major concerns | Major concerns | Very low          |
| DOC_ADT:ENZA_ADT         | 0                 | Some concerns     | Low risk       | No concerns  | Some concerns | Some concerns  | Major concerns | Very low          |
| DOC_ADT:RT_ADT           | 0                 | Some concerns     | Low risk       | No concerns  | No concerns   | Major concerns | Major concerns | Very low          |
| ENZA_ADT:RT_ADT          | 0                 | Some concerns     | Low risk       | No concerns  | No concerns   | Major concerns | Major concerns | Very low          |

The end.
